# Supplementary material for: Recent intimate partner violence against women and health: a systematic review and meta-analysis of cohort studies
Source: PubMed Central journal article supplement — BMJ Open. 2018 Jul 28;8(7):e019995. doi: 10.1136/bmjopen-2017-019995 (PMC6067339; doi:10.1136/bmjopen-2017-019995), 2018-07-28
Supplement: bmjopen-2017-019995.draft_revisions.pdf [file bmjopen-2017-019995.draft_revisions.pdf]

# BMJ Open

BMJ Open is committed to open peer review. As part of this commitment we make the peer review history of every article we publish publicly available.

When an article is published we post the peer reviewers' comments and the authors' responses online. We also post the versions of the paper that were used during peer review. These are the versions that the peer review comments apply to.

The versions of the paper that follow are the versions that were submitted during the peer review process. They are not the versions of record or the final published versions. They should not be cited or distributed as the published version of this manuscript.

BMJ Open is an open access journal and the full, final, typeset and author-corrected version of record of the manuscript is available on our site with no access controls, subscription charges or pay-per-view fees (<http://bmjopen.bmj.com>).

If you have any questions on BMJ Open's open peer review process please email [info.bmjopen@bmj.com](mailto:info.bmjopen@bmj.com)

# BMJ Open

## Recent intimate partner violence against women and health: a systematic review and meta-analysis of cohort studies

|                                 |                                                                                                                                                                                                                                                                                                                                                                                                                     |
|---------------------------------|---------------------------------------------------------------------------------------------------------------------------------------------------------------------------------------------------------------------------------------------------------------------------------------------------------------------------------------------------------------------------------------------------------------------|
| Journal:                        | <i>BMJ Open</i>                                                                                                                                                                                                                                                                                                                                                                                                     |
| Manuscript ID                   | bmjopen-2017-019995                                                                                                                                                                                                                                                                                                                                                                                                 |
| Article Type:                   | Research                                                                                                                                                                                                                                                                                                                                                                                                            |
| Date Submitted by the Author:   | 09-Oct-2017                                                                                                                                                                                                                                                                                                                                                                                                         |
| Complete List of Authors:       | Bacchus, Loraine; London School of Hygiene and Tropical Medicine, Global Health and Development<br>Ranganathan, Meghna; London School of Hygiene and Tropical Medicine, Global Health and Development<br>Watts, Charlotte; London School of Hygiene & Tropical Medicine, Global Health and Development<br>Devries, Karen; London School of Hygiene & Tropical Medicine, Department of Global Health and Development |
| <b>Primary Subject Heading</b>: | Public health                                                                                                                                                                                                                                                                                                                                                                                                       |
| Secondary Subject Heading:      | Epidemiology                                                                                                                                                                                                                                                                                                                                                                                                        |
| Keywords:                       | Depression & mood disorders < PSYCHIATRY, Substance misuse < PSYCHIATRY, Suicide & self-harm < PSYCHIATRY, PUBLIC HEALTH                                                                                                                                                                                                                                                                                            |
|                                 |                                                                                                                                                                                                                                                                                                                                                                                                                     |

SCHOLARONE™  
Manuscripts

1  
2  
3 **Recent intimate partner violence against women and health: a systematic review and**  
4  
5 **meta-analysis of cohort studies**  
6  
7

8  
9 Loraine J. Bacchus<sup>1</sup>, Meghna Ranganathan<sup>1</sup>, Charlotte Watts<sup>1</sup>, Karen Devries<sup>1</sup>

10  
11 <sup>1</sup>London School of Hygiene & Tropical Medicine

12  
13 Faculty of Public Health & Policy

14  
15 Department of Global Health and Development

16  
17 London, UK  
18  
19  
20  
21  
22

23 **Corresponding author**

24  
25 Dr Loraine J. Bacchus

26  
27 London School of Hygiene & Tropical Medicine

28  
29 15-17 Tavistock Place

30  
31 London WC1H 9SH

32  
33 E: [Loraine.Bacchus@lshtm.ac.uk](mailto:Loraine.Bacchus@lshtm.ac.uk)

34  
35 T: +44 (0)20 7958 8244  
36  
37  
38  
39

40  
41 Keywords: Domestic violence, depression, substance related disorders, alcohol related  
42  
43 disorders

44  
45 Word count: 6,944  
46  
47  
48  
49  
50  
51  
52  
53  
54  
55  
56  
57  
58  
59  
60

## Abstract

**Objectives:** We reviewed cohort studies to determine the magnitude and temporal direction of the association between recent intimate partner violence (IPV) and health.

**Design:** Systematic review and meta-analysis.

**Methods:** Medline, EMBASE and PsycINFO were searched from the first record to November 2016. Recent IPV was defined as occurring up to and including the last 12 months; all health outcomes were eligible for inclusion. Results were combined using random effects meta-analysis.

**Results:** 33 separate cohort studies were retrieved. Eight studies showed evidence of a positive association between recent IPV and depressive symptoms, of which seven were statistically significant, with a pooled OR from five estimates of 1.76 (95% CI 1.26-2.44,  $I^2 = 37.5%$   $p=0.172$ ). Five studies demonstrated a positive, statistically significant relationship between depressive symptoms and subsequent IPV; pooled ORs from two studies was 1.72 (95% CI 1.28-2.31,  $I^2 = 0.0%$ ,  $p=0.752$ ). Recent IPV was also associated with increased symptoms of postpartum depression in four studies (OR=1.84, 95% CI 1.08-3.15) although there was substantial heterogeneity. There was some evidence of a bi-directional relationship between recent IPV and hard drug use, and marijuana use although studies were limited. There was no evidence of an association between recent IPV and alcohol use or sexually transmitted infections (STIs) although there were few studies and inconsistent measurement of alcohol and STIs.

## Conclusions

Exposure to violence has significant impacts. Further longitudinal studies are needed to understand the temporal relationship between recent IPV and different health issues, whilst controlling for potential confounding factors and considering the differential effects of recent versus past exposure to IPV. Improved measurement will enable an understanding of the

1  
2  
3 immediate and longer-term health needs of women exposed to IPV. Health care providers and  
4  
5 IPV organisations should be aware of the bi-directional relationship between recent IPV and  
6  
7 depressive symptoms.  
8  
9

### 10 11 12 **Strengths**

- 14     ▪ This is the first systematic review of cohort studies to measure the magnitude of the  
15         association and temporal direction between recent exposure to IPV and health  
16         outcomes.  
17  
18
- 20     ▪ As the review considers a broad range of outcomes, we identified gaps in the evidence  
21         base including a need for cohort studies on recent IPV and non-communicable  
22         diseases such as cardiovascular disease hypertension and obesity, as well as  
23         posttraumatic stress disorder and anxiety disorder.  
24  
25  
26  
27  
28

### 29 30 **Limitations**

- 31     ▪ Due to the large number of abstracts retrieved and the limited timeframe for the  
32         review, we were not able to employ double screening of abstracts. However, two  
33         researchers conducted the review of full text papers  
34  
35  
36  
37
- 38     ▪ As some studies measured the outcome variable (either IPV or the health condition)  
39         continuously, it was not possible to combine all measures of effect, which limited the  
40         number of studies in the meta-analyses.  
41  
42  
43
- 44     ▪ It was not possible to quantitatively assess publication bias as too few studies were in  
45         the meta-analyses of each health condition.  
46  
47  
48  
49  
50  
51  
52  
53  
54  
55  
56  
57  
58  
59  
60

## Background

Worldwide, almost a third (30%) of all women who have been in a relationship have experienced physical and/or sexual violence by their intimate partner [1, 2]. Women's lifetime exposure to intimate partner violence (IPV) is associated with myriad health outcomes. Systematic reviews of longitudinal data, find that women who have been physically and/or sexually abused by their partner at some point in their life are twice as likely to have an abortion, twice as likely to suffer from depression, and in some regions are 1.5 times more likely to acquire HIV compared to women who have not experienced IPV [2]. Not surprisingly, given its high prevalence and health effects, lifetime exposure to IPV is estimated to result in a high burden of disease. IPV is the second most common risk factor for disability-adjusted life years (DALY) globally in women aged 20 to 24 years [3].

In our previous systematic reviews, we began to explore the relationships between 'ever' exposure to IPV and specific health outcomes over time, which revealed evidence of a bidirectional association. Devries et al. found evidence suggestive of an association between IPV and incident depressive symptoms (OR=1.97, 95% CI 1.56-2.48) as well as an association in the reverse direction between depressive symptoms and incident IPV (OR=1.93, 95% CI 1.51-2.48) [4]. In another systematic review the authors found increased odds of alcohol use following IPV (OR=1.25, 95% CI 1.02-1.52) and increased odds of IPV following alcohol use (OR=1.27, 95% CI 1.07-1.52). [5].

Although available evidence finds important associations between IPV and a range of mental and physical health outcomes, the nature of the associations are not always clear. It is possible that exposure to IPV results in subsequent mental and physical health outcomes; that

1  
2  
3 different mental and physical health conditions increase risk of subsequent IPV; or that a bi-  
4  
5 directional relationship is present.  
6  
7

8  
9 Both IPV and some associated health outcomes, such as depression, anxiety and substance  
10 abuse, are chronic, episodic conditions, which can occur with varying frequency over longer  
11 time periods. Studies that measure lifetime exposure to IPV therefore hide the complexity of  
12 the relationship between IPV and mental and physical health outcomes. This is because  
13 estimates of 'ever' exposure to IPV are heterogeneous, and may include anything from past  
14 year, before the past year and more distant experiences of IPV. Recent violence may lead to  
15 more severe health outcomes, but this may be influenced by duration and severity, for  
16 example, recent violence with no prior history versus recent violence experienced as part of  
17 ongoing historical abuse.  
18  
19  
20  
21  
22  
23  
24  
25  
26  
27  
28

29  
30  
31  
32 In the current systematic review, we build on this by closely examining the issue of  
33 temporality with regard to recent exposure to IPV and a broader range of health outcomes. In  
34 this paper we aim to: (i) review what health outcomes have been examined in cohort studies  
35 of recent IPV ('recent' defined here as IPV experienced up to and including the last 12  
36 months); (ii) quantify the magnitude of the association between IPV and different health  
37 outcomes and (iii) examine the temporal direction of IPV and health outcomes.  
38  
39  
40  
41  
42  
43  
44  
45  
46

## 47 **Methods**

### 48 *Literature searches*

49  
50 We searched Medline, EMBASE and PsycINFO from the first record up to January 27, 2016  
51 (with an updated search conducted in November 2016). Terms for IPV were adapted from a  
52 previous systematic review on the prevalence of IPV and health outcomes which was  
53  
54  
55  
56  
57  
58  
59  
60

1  
2  
3 conducted for the 2010 Global Burden of Disease of IPV (Devries et al. 2013). Controlled  
4  
5 vocabulary terms and text words related to longitudinal studies were used for each database.  
6  
7 In order to ensure a wide yield of studies, terms for specific health outcomes were not  
8  
9 included. An example search strategy appears in Appendix 1.  
10  
11

### 12 13 14 ***Inclusion criteria***

15  
16 English language longitudinal studies reporting on female participants aged 15 and over were  
17  
18 considered. Studies were deemed longitudinal if either the exposure or the outcome was  
19  
20 measured on at least two occasions. All author definitions of recent IPV victimisation that  
21  
22 occurred up to and including 12 months prior, and all author definitions of health outcomes  
23  
24 that were measured on at least two occasions were eligible for inclusion. A 12-month cut-off  
25  
26 period was chosen for IPV as this is the most commonly used period for prevalence  
27  
28 estimates, it is consistent with internationally recognised IPV measures, [6, 7] and has been  
29  
30 used in a number of intervention studies for IPV. [8-10]. We included studies where IPV was  
31  
32 conceptualised as the independent variable, or where IPV was the dependent variable, in  
33  
34 order to capture any evidence of bi-directional causality. Cohort studies reporting on  
35  
36 analyses of exposures and outcomes assessed in the same time point were not included. The  
37  
38 study selection process is summarised in the flowchart in Figure 1.  
39  
40  
41  
42  
43  
44

### 45 ***Screening and data extraction***

46  
47 Records were initially screened by one reviewer (LJB) and studies not meeting the inclusion  
48  
49 criteria were removed. Full-text articles were formally appraised for inclusion by two  
50  
51 reviewers (LJB and MR). Data were extracted and entered into an Excel spreadsheet by one  
52  
53 reviewer (LJB). Information about the study population, exposure and outcome definitions,  
54  
55 length of follow-up, effect estimates and measures of uncertainty were recorded.  
56  
57  
58  
59  
60



### *Quality appraisal*

The quality of each effect estimate was appraised. Consideration was given to whether definitions of IPV and health outcomes were based on valid, reliable measures. We considered whether studies controlled for potential confounders for two reasons. Firstly, because IPV and the health outcomes of interest commonly occur episodically over a period of time, and episodes of either that are incident over the study period may be a continuation of previous IPV or health outcomes. Therefore, we examined whether studies adjusted for time one levels (i.e. at the beginning of the study period) of the outcome variable. Secondly, because both IPV and the health outcomes of interest are associated with demographic characteristics and other risk factors that may explain the association between them. Due to the complexity of the potential causal pathways between IPV and the health outcomes, we did not specify a minimum set of confounders that should be adjusted for. Additionally, it has been noted that it is not always appropriate to adjust for baseline levels of an outcome variable in longitudinal studies. When exposures are associated with baseline health status, bias can arise if change in health status preceded baseline assessment or if the dependent variable measurement is unreliable or unstable [11]. However, we recorded whether key variables were adjusted for and examined the results in the light of these adjustments. Information was also extracted in relation to length of follow-up and attrition rates.

### *Data Analysis*

Analyses were conducted by LJB and KD using Stata 14.0. Study characteristics and quality are summarised descriptively. Studies reported a range of effect estimates (e.g. odds ratios, relative risks and correlation coefficients). Where studies did not report odds ratios (ORs), these were calculated from raw data where possible. Studies measured IPV or health outcomes in heterogeneous ways, therefore the results are summarised descriptively for each

1  
2  
3 health outcome. Where possible, random effects meta-analysis was used to calculate the  
4  
5 pooled ORs representing associations between IPV occurring up to and including the last 12  
6  
7 months and various health outcomes. Higgin's  $I^2$  statistic, which describes the percentage of  
8  
9 variability in point estimates that is due to heterogeneity rather than sampling error [12], was  
10  
11 calculated. Some studies reported multiple estimates using overlapping definitions of IPV on  
12  
13 the same sample of participants. In order to avoid double counting participants in these  
14  
15 studies, which can lead to falsely precise pooled estimates, preference was given to one  
16  
17 estimate using the following algorithm: (i) those derived from multivariate analysis (ii) where  
18  
19 the definition of IPV closely matched that of the other studies in the meta-analysis (iii) where  
20  
21 the reference group was unexposed to any violence and (iv) where the estimate was most  
22  
23 precise (i.e. the smallest confidence interval). Studies that provided multiple estimates but on  
24  
25 different sub-samples of participants were included in the meta-analysis.  
26  
27  
28  
29  
30  
31

### 32 ***Ethics Statement***

33  
34 All data used in this review were already in the public domain and ethical approval was not  
35  
36 required.  
37  
38  
39  
40  
41  
42  
43  
44  
45  
46  
47  
48  
49  
50  
51  
52  
53  
54  
55  
56  
57  
58  
59  
60

Figure 2: Flow of studies through the review

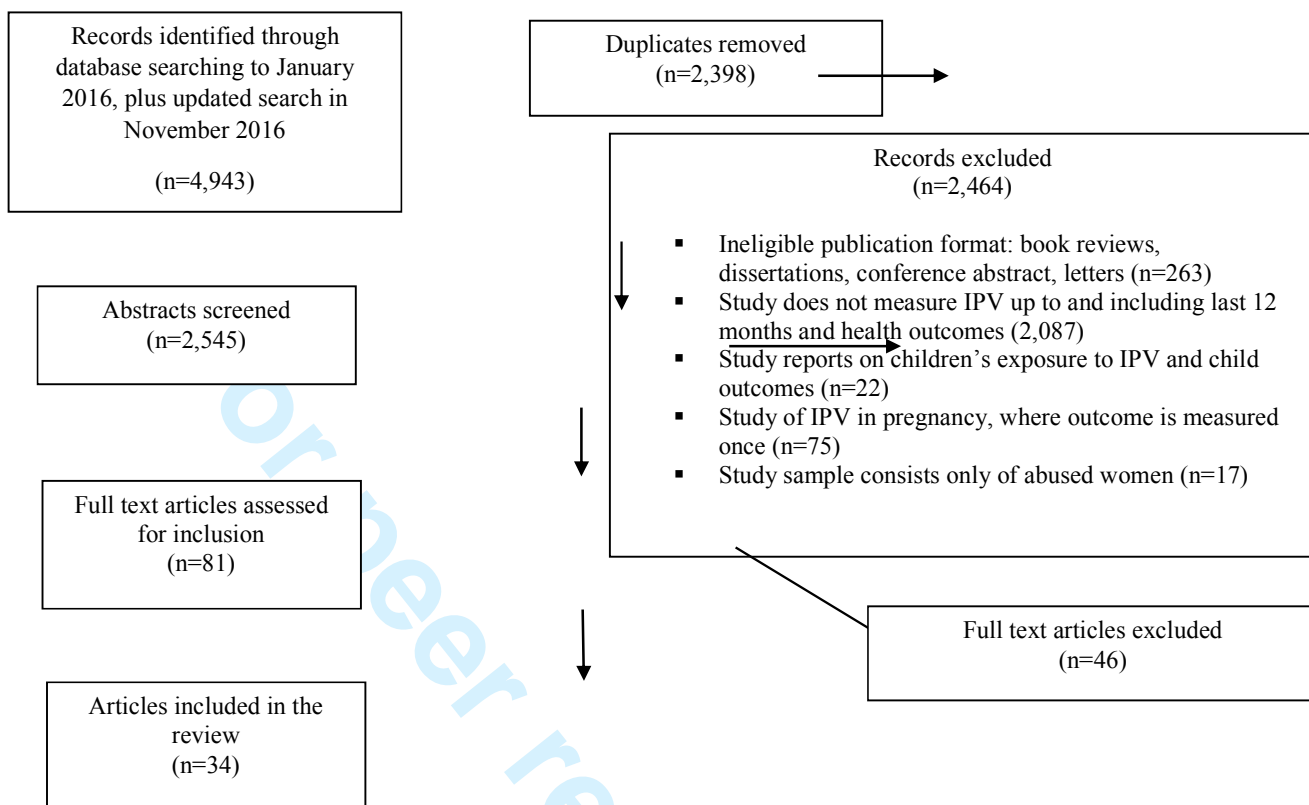

## Results

### *Study characteristics*

Thirty-three separate cohort studies described in 34 articles published between 2002 and 2016 with 47,352 participants met the inclusion criteria and contained 172 effect estimates of association between IPV and health outcomes. Seventeen articles were from the USA [13-29], three from Australia [30-32], two from New Zealand [33, 34], three from South Africa [35-37], two from India [38, 39], one from Puerto Rico [40], one from Spain [41], one from Korea [42], one from Nicaragua [43], one from Kenya [44], one from Japan [45], and one from the UK [46]. Amongst the 33 cohort studies, 11 were household surveys [13, 19, 27, 28, 31, 34, 38, 42, 43, 46, 47], 12 sampled participants from clinical settings [14, 20, 21, 23, 25, 26, 30, 32, 39, 41, 44, 45], seven from schools [16, 17, 22, 24, 29, 35, 48] and three from the local community [15, 37, 40]. Three studies were based on sub-populations of women including those who were receiving methadone maintenance treatment [20, 21], women attending a clinic with depressive symptoms at baseline [30], HIV-positive female sex workers [44] and pregnant women . Six studies focussed on adolescents [16-18, 22, 24, 29] and one included women and young girls [35, 36]. Six studies were of pregnant women [32, 37, 39, 41, 45, 46].

Table 1 presents the different health outcomes measured in the studies, the number of studies that measure each health condition, the overall number of estimates that contribute to each health condition, and the number of estimates that contribute to the meta-analysis.

**Table 1: Health outcomes measured in the 33 studies and number of estimates**

| Health outcome                                 | Number of studies and estimates, refs                            | Number of estimates in the meta-analysis |
|------------------------------------------------|------------------------------------------------------------------|------------------------------------------|
| Depression                                     | 13 studies [13, 17, 19, 22-26, 30, 31, 36, 38, 42]; 13 estimates | 7                                        |
| Postpartum depression                          | 6 studies [32, 37, 39, 41, 45, 46]; 9 estimates                  | 5                                        |
| Suicide attempts                               | 2 studies [22, 38]; 2 estimates                                  | NA                                       |
| Perceived stress                               | 2 studies [27, 43]; 3 estimates                                  | NA                                       |
| General anxiety                                | 1 study [25]; 1 estimate                                         | NA                                       |
| Self-perceived health status                   | 1 study [41]; 1 estimate                                         | NA                                       |
| Hard drug use                                  | 4 studies [14, 21, 28, 40]; 6 estimates                          | 5                                        |
| Marijuana use                                  | 4 studies [14, 16, 21, 28]; 7 estimates                          | 5                                        |
| Other combinations of illicit drug/alcohol use | 4 studies [14, 16, 22, 23]; 5 estimates                          | NA                                       |
| Alcohol use                                    | 10 studies [14-16, 19, 21, 27, 29, 34, 47]; 18 estimates         | 9                                        |
| HIV infection                                  | 2 studies [20, 35]; 3 estimates                                  | NA                                       |
| Sexually transmitted infections (STI)          | 3 studies [20, 38, 44]; 2 estimates                              | NA                                       |
| Sexual risk behaviours                         | 3 studies [18, 20, 44]; 8 estimates                              | NA                                       |
| Abnormal vaginal discharge                     | 1 study [38]; 3 estimates                                        | NA                                       |
| Dysuria                                        | 1 study [38]; 3 estimates                                        | NA                                       |
| Lower abdominal pain                           | 1 study [38]; 3 estimates                                        | NA                                       |
| Dyspareunia                                    | 1 study [38]; 3 estimates                                        | NA                                       |

NA- Not applicable as study estimates were continuous and could not be included in a meta-analysis

Table 2 summarises quality issues in relation to the 34 papers reporting on 33 separate cohort studies included in the review. All, but three of the 33 cohort studies used recognised, validated IPV instruments or used items that were taken from validated instruments [39, 42, 46]. All, but six studies assessed for IPV that occurred in the last 12 months; one measured IPV in the last three months [38], two in the last six months [20, 21, 23], one in the last four months [29], and two measured IPV that occurred during pregnancy [39, 46]. Most of the studies assessed for physical and/or sexual violence from a partner, with some also including threats, emotional or verbal abuse. The attrition rate was reported or calculated in 18 studies and ranged from 9.0% [27] to 37.4% [30]. The length of follow-up ranged from one month [45] to 20 years and the number of waves ranged from two to 10 years [47]. The smallest sample size was 73 adolescents [29] and the largest was 9,683 adult women [31]. Table 3 (Appendix 2) presents all study estimates grouped by health outcome.

Table 2: Quality assessment of 34 papers reporting on 33 studies included in the review

| Author                    | Country      | Sample                         | Number of estimates in the study | Health outcomes measured in study                                                                         | IPV measure and timeframe                                                                  | Number of waves and length of follow-up | Attrition at last wave % |
|---------------------------|--------------|--------------------------------|----------------------------------|-----------------------------------------------------------------------------------------------------------|--------------------------------------------------------------------------------------------|-----------------------------------------|--------------------------|
| Algeria et al. [40]       | Puerto Rico  | 452 adult women                | 1                                | Hard drug use                                                                                             | Physical and/or psychological, CTS, last 12 months                                         | 3 waves; 3 years                        | -                        |
| Boden et al. [47]         | New Zealand  | 630 adult women                | 3                                | Alcohol use                                                                                               | Physical and/or sexual, CTS, last 12 months                                                | 4 waves; 10 years                       | -                        |
| Chowdhary et al. [38]     | India        | 1,750 adult women              | 21                               | Depression; suicide attempts; STI; abnormal vaginal discharge; dysuria; lower abdominal pain; dyspareunia | Physical, CTS-like, last 3 months                                                          | 3 waves; 1 year                         | -                        |
| Chuang et al. [13]        | USA          | 1,420 adult women              | 1                                | Depression                                                                                                | Physical and/or sexual, CTS-like, last 12 months                                           | 2 waves; 2 years                        | 29.1%                    |
| Davidson et al. [30]      | Australia    | 494 adult women                | 1                                | Depression                                                                                                | Physical and/or sexual, CAS, last 12 months                                                | 2 waves; 2 years                        | 37.4%                    |
| El-Bassel et al. [20]     | USA          | 405 adult women at a methadone | 6                                | HIV infection; STI; sexual risk behaviour                                                                 | Physical and/or sexual, CTS, last 6 months                                                 | 3 waves; 1 year                         | 24.0%                    |
| El-Bassel et al. [21]     | USA          | 317 adult women                | 10                               | Alcohol use; hard drug use; marijuana use                                                                 | Physical and/or sexual, CTS, last 6 months                                                 | 3 waves; 1 year                         | 24.0%                    |
| Escriba-Aguir et al. [41] | Spain        | 888 pregnant women             | 2                                | Postpartum depression; self-perceived health status                                                       | Psychological abuse, AAS, last 12 months                                                   | 4 waves, 1 year                         | 33.5%                    |
| Flach et al. [46]         | UK           | 5,681 pregnant women           | 1                                | Postpartum depression                                                                                     | "Has a partner physically hurt and/or been emotionally cruel since the start of pregnancy" | 5 waves; 3.5 years                      | -                        |
| Foshee et al. [24]        | USA          | 1,291 adolescents              | 1                                | Depression                                                                                                | Sexual dating violence, CTS, last 12 months                                                | 4-5 waves; 4-5 years                    | -                        |
| Gao et al. [34]           | New Zealand  | 636 adult women                | 4                                | Alcohol use                                                                                               | Physical and/or verbal, CTS, last 12 months                                                | 2 waves; 2 years                        | 16.9%                    |
| Gilbert et al. [14]       | USA          | 185 adult women                | 60                               | Alcohol use; hard drug use; marijuana use; any illicit drug use                                           | Physical, injurious, sexual, CTS, last 12 months                                           | 3 waves; 1 year                         | 23.2%                    |
| Jewkes et al. [35]        | South Africa | 1,099 women and girls          | 2                                | HIV infection                                                                                             | Physical and/or sexual, WHO Survey, last 12 months                                         | 3 waves; 2 years                        | 12.5%                    |
| Keiley et al. [15]        | USA          | 195 couples                    | 2                                | Alcohol use                                                                                               | Physical, verbal, CTS, last 12 months                                                      | 2 waves; 2.5 years                      | -                        |
| Kim & Lee [42]            | Korea        | 3,153 adult women              | 2                                | Depression                                                                                                | "Physical violence and/or threat of physical violence", last 12 months                     | 4 waves; 4 years                        | 34.2%                    |

| Author                 | Country      | Sample              | Number of estimates in the study | Health outcomes measured in study                | IPV measure and timeframe                                                                     | Number of waves and length of follow-up | Attrition at last wave % |
|------------------------|--------------|---------------------|----------------------------------|--------------------------------------------------|-----------------------------------------------------------------------------------------------|-----------------------------------------|--------------------------|
| Kita et al. [45]       | Japan        | 562 pregnant women  | 1                                | Postpartum depression                            | “Physical” and/or “non-physical”, ISA, last 12 months                                         | 2 waves; 1 month                        | 26.7%                    |
| Leher et al. [17]      | USA          | 1,659 adolescents   | 1                                | Depression                                       | Physical, CTS-like, last 12 months                                                            | 3 waves; 7 years                        | -                        |
| Levendosky et al. [26] | USA          | 150 adults          | 1                                | Depression                                       | Physical and/or sexual, SVAWS, last 12 months                                                 | 5 waves; 4 years                        | -                        |
| Marsh Buzy et al. [29] | USA          | 73 adolescents      | 1                                | Alcohol use                                      | Physical and/or sexual, CTS, last 4 months                                                    | 2 waves; 4 months                       | 31.1%                    |
| Newcomb et al. [23]    | USA          | 113 adult women     | 2                                | Depression                                       | Psychological and/or physical, CTS, last 6 months                                             | 3 waves; 1 year                         | 24.0%                    |
| Nduna et al. [36]      | South Africa | 995 women and girls | 1                                | Depression                                       | Physical and/or sexual, WHO survey, last 12 months                                            | 2 waves; 1 year                         | 22.6%                    |
| Nowotny & Graves [16]  | USA          | 2,959 adolescents   | 12                               | Alcohol use; marijuana use; any illicit drug use | Minor violence, major violence, sexual violence, injurious violence, CTS-like, last 12 months | 2 waves; 6 years                        | -                        |
| Patel et al. [39]      | India        | 235 pregnant women  | 1                                | Postpartum depression                            | “Physical and/or emotional during pregnancy”                                                  | 3 waves; 6 months                       | 13.0%                    |
| Roberts et al. [22]    | USA          | 2,206 adolescents   | 3                                | Depression                                       | Physical, CTS, last 12 months                                                                 | 2 waves; 1 year                         | -                        |
| Salazar et al. [43]    | Nicaragua    | 398 adult women     | 1                                | Perceived emotional distress                     | Emotional, physical, sexual, WHO survey, last 12 months                                       | 2 waves; 3 years                        | 16.7%                    |
| Suglia et al. [25]     | USA          | 1,834 adult women   | 2                                | Depression; general anxiety                      | Physical and/or sexual, CTS, last 12 months                                                   | 3 waves; 3 years                        | -                        |
| Taft et al. [31]       | Australia    | 9,683 adult women   | 1                                | Depression                                       | Physical and/or sexual, CTS, last 12 months                                                   | 2 waves; 4 years                        | -                        |
| Teitelman et al. [48]  | USA          | 2,629 adolescents   | 1                                | HIV risk                                         | Verbal and/or physical, CTS, last 12 months                                                   | 2 waves; 7 years                        | -                        |
| Testa et al. [27]      | USA          | 494 adult women     | 4                                | Alcohol use; perceived stress                    | Physical aggression, verbal aggression, CTS, last 12 months                                   | 2 waves; 2 years                        | 9.0%                     |
| Testa et al. [28]      | USA          | 724 adult women     | 6                                | Alcohol use; hard drug use; marijuana use        | Minor violence, severe violence, CTS, last 12 months                                          | 2 waves; 1 year                         | -                        |
| Tsai et al. [37]       | South Africa | 958 pregnant women  | 2                                | Postpartum depression                            | Physical, CTS, last 12 months                                                                 | 4 waves; 3 years                        | 22.6%                    |

| Author                | Country   | Sample                              | Number of estimates in the study | Health outcomes measured in study | IPV measure and timeframe                      | Number of waves and length of follow-up                                         | Attrition at last wave % |
|-----------------------|-----------|-------------------------------------|----------------------------------|-----------------------------------|------------------------------------------------|---------------------------------------------------------------------------------|--------------------------|
| Wilson et al. [44]    | Kenya     | 389 HIV-positive female sex workers | 7                                | STI; sexual risk behaviour        | Physical and/or sexual, WHO, last 12 months    | Unclear - "67.9% had one annual visit and 35.5% had two annual visits"; 2 years | -                        |
| Woolhouse et al. [32] | Australia | 1,102 pregnant women                | 3                                | Postpartum depression             | Physical and/or emotional, CAS, last 12 months | 6 waves; 4 years                                                                | 18.1%                    |
| Zlotnick et al. [19]  | USA       | 2,905 adult women                   | 2                                | Depression                        | Physical, CTS-like, last 12 months             | 2 waves; 5 years                                                                | -                        |

AAS, Abuse Assessment Screen; ADS, Alcohol Dependence Scale; BDI, Beck Depression Inventory; CAS, Composite Abuse Scale; CES-D, Center for Epidemiological Studies-Depression; CIDI-SF, Composite International Diagnostic Interview-Short Form; CTS, Conflict Tactics Scale; ISA, Index of Spouse Abuse; MAST, Michigan Alcoholism Screening Test; SRQ, Self-Report Questionnaire; SVAWS, Severity of Violence Against Women Scale



### *IPV and depressive symptoms*

Thirteen studies examined the relationship between recent IPV and depressive symptoms of which one examined the association in both directions. Of these, nine studies provided nine estimates of association between IPV and subsequent depressive symptoms [13, 19, 22, 23, 25, 30, 31, 38, 42]. Eight of these estimates showed a positive direction of association between experience of IPV and subsequent depressive symptoms, with seven reaching statistical significance.

Five studies provided five estimates of association between depression and subsequent IPV, all of which showed a positive and statistically significant relationship [17, 24, 26, 36, 42].

We were able to include seven estimates reporting binary IPV measures and binary depressive symptoms or disorder measure in the meta-analysis (Figure 3). For IPV and later depressive symptoms or disorder, the pooled OR from five estimates was 1.76 (95% CI 1.26-2.44,  $I^2 = 37.5%$   $p=0.172$ ). Two estimates, were included in the meta-analysis of the relationship between depressive symptoms and later IPV, resulting in a pooled OR of 1.72 (95% CI 1.28-2.31,  $I^2 = 0.0%$ ,  $p=0.752$ ). One study, not included in the meta-analyses examined the bi-directional relationship between IPV and depression [42]. A Korean study of married women found that IPV at Wave 1 was positively associated with the depression level at Wave 1 (Beta=0.030, SE=0.03,  $p<0.001$ ), but negatively associated with the growth rate of depression over the study period (Beta=-0.03, SE=0.01,  $p=0.004$ ). IPV experienced at Wave 4 was associated with a larger growth rate of depression in the model (Beta=3.34, SE=0.61,  $p<0.001$ ) and the experience of IPV at Wave 1 (Beta=0.68, SE=0.11,  $p<0.001$ ).

**Depression measurement:** Of the nine estimates that measured IPV and subsequent depressive symptoms, one measured depressive symptoms occurring in the past 12 months,

1  
2  
3 one in the last two weeks, five in the last week, one “current” and one did not specify a time  
4  
5 period. Of the five estimates that measured depressive symptoms and subsequent IPV, three  
6  
7 measured depressive symptoms in the past week, one in the past six months and one did not  
8  
9 specify a time period.  
10

11  
12  
13  
14 Of the 18 studies, eight used the Center for Epidemiologic Studies Depression Scale (CES-D)  
15  
16 [13, 17, 19, 22, 23, 31, 36, 42], one study used the WHO ICD-10 [38], one used the  
17  
18 Composite International Diagnostic Interview-Short Form (CIDI-SF) [25], one used the  
19  
20 Patient Health Questionnaire (PHQ) [30], one used the Beck Depression Inventory (BDI)  
21  
22 [26], and one used a scale from Kandel and Davies [24].  
23  
24

25  
26  
27 **Common risk factors/confounding:** Of the nine estimates that measured IPV and later  
28  
29 depressive symptoms and disorder, eight controlled for time one levels of depression.  
30  
31 Chowdhary & Patel [38] excluded women with baseline depressive disorder in their analysis,  
32  
33 but this may have resulted in the exclusion of cases of IPV that preceded depressive  
34  
35 symptoms at baseline and the remaining cases may not have been representative of women  
36  
37 experiencing IPV. All, but one of the five estimates that measured depressive symptoms and  
38  
39 later IPV, controlled for time one levels of IPV [26]. Of the 18 studies, 11 controlled for  
40  
41 socio-demographic factors. Other confounders were not comprehensively controlled for. Two  
42  
43 studies controlled for childhood physical and/or sexual abuse [17, 30] and two for alcohol use  
44  
45 [24, 36], of which one also controlled for childhood adversity [36]. There were no discernible  
46  
47 differences in effect estimates regardless of which confounders were adjusted for and studies  
48  
49 found similar directions and varying magnitudes of association.  
50  
51  
52  
53  
54

55  
56 *IPV and postpartum depressive symptoms*  
57  
58  
59  
60

1  
2  
3 Six studies provided eight estimates of association between IPV and subsequent postpartum  
4 depressive symptoms [32, 37, 39, 41, 45, 46]. Six of these estimates showed a positive  
5 direction of association between IPV and subsequent postpartum depressive symptoms, with  
6 five reaching statistical significance. Six estimates were included in the meta-analysis of the  
7 relationship between IPV and subsequent postpartum depression, resulting in a pooled OR of  
8 1.84 (95% CI 1.08-3.15). This was heterogeneous ( $I^2 = 78.3\%$ ,  $p=0.001$ ). One study, which  
9 examined the bi-directional relationship, found that depression symptom severity was  
10 associated with a greater risk of subsequent IPV [37].  
11  
12  
13  
14  
15  
16  
17  
18  
19  
20  
21  
22

23 **Postpartum depression measurement:** Of the eight estimates that measured IPV and  
24 subsequent depressive symptoms, one measured depressive symptoms occurring in the past  
25 12 months and seven in the last week. One estimate measured postpartum depression in the  
26 last week and subsequent IPV. Of the six studies, five used the Edinburgh Postnatal  
27 Depression Scale (EPDS) [32, 37, 39, 41, 46] and one used the Hospital Anxiety and  
28 Depression Scale (HADS) [45].  
29  
30  
31  
32  
33  
34  
35

36 **Common risk factors/confounding:** Four of the six studies of IPV and postpartum  
37 depression controlled for time one levels of depressive symptoms and four controlled for  
38 socio-demographic factors. One study controlled for HIV serostatus [37].  
39  
40  
41  
42  
43  
44  
45  
46  
47  
48  
49  
50  
51  
52  
53  
54  
55  
56  
57  
58  
59  
60

Figure 3: Forest plot estimates of the association between IPV and depression

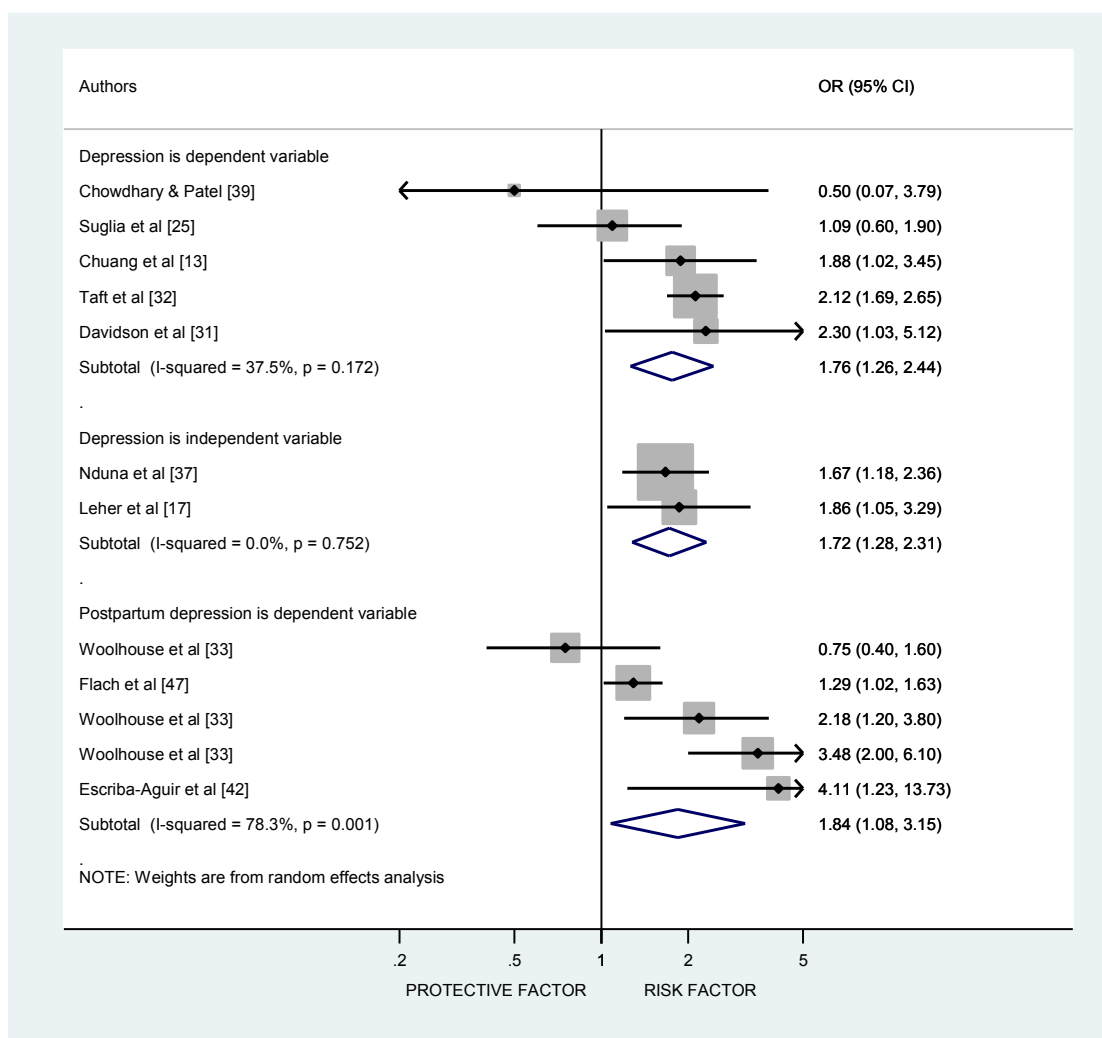

Note: Woolhouse estimates are based on different sub-samples and are mutually exclusive

**IPV and alcohol use**

Ten studies examined the relationship between recent IPV and alcohol use. Of these, eight studies provided 15 estimates of association between IPV and subsequent alcohol use [14-16, 19, 21, 27, 34, 47]. All, but one of these 15 estimates showed a positive direction of association between IPV and subsequent alcohol use, with five reaching statistical significance. Two studies provided three estimates showing a positive direction of association between alcohol use and later IPV [28, 29], of which one was statistically significant. For

1  
2  
3 IPV and later alcohol use, the pooled OR from six estimates was 1.19 (95% CI 0.91-1.55,  $I^2 =$   
4  
5 0.0%,  $p=0.523$ ). Three estimates were included in the meta-analysis of the relationship  
6  
7 between alcohol use and later IPV, resulting in a pooled OR of 1.11 (95% CI 0.91-1.35,  $I^2 =$   
8  
9 0.0%,  $p=0.672$ ).  
10

11  
12  
13 **Alcohol use measurement:** Of the 15 estimates that measured IPV and subsequent alcohol  
14  
15 use, 12 measured alcohol use in the last 12 months, two in the last six months, and one in the  
16  
17 last 30 days. Of the three estimates that measured alcohol use and subsequent IPV, two  
18  
19 measured alcohol use in the last 12 months and one in the last four months. Alcohol  
20  
21 consumption was measured in a variety of ways. Of the 10 studies, one assessed alcohol  
22  
23 abuse or dependence using the Composite International Diagnostic Interview-Short Form  
24  
25 (CIDI-SF) [47], four measured binge drinking which was based on the number of alcoholic  
26  
27 drinks consumed on one occasion [14, 16, 21, 34], three measured heavy drinking which was  
28  
29 assessed using a combined quantity-frequency measure [27-29], one used the Alcohol  
30  
31 Dependence Scale and the Michigan Alcohol Screening Test [15] and one used the National  
32  
33 Survey of Alcohol and Drug Abuse [19].  
34  
35  
36  
37  
38  
39

40  
41 **Common risk factors/confounding:** Of the 15 estimates that measured IPV and later alcohol  
42  
43 use, only four adjusted for time one levels of alcohol use. All three estimates that examined  
44  
45 the association between alcohol use and later IPV adjusted for time one levels of IPV. Of the  
46  
47 10 studies, 7 controlled for socio-demographic factors. Two studies adjusted for a history of  
48  
49 trauma. El-Bassel [21] controlled for childhood sexual abuse, post-traumatic stress disorder,  
50  
51 multiple concurrent partners and frequency of condom use. Gilbert [14] also controlled for  
52  
53 childhood sexual abuse as well as psychological distress, coping strategies, the partner's  
54  
55 illicit drug use and binge drinking and sexual relationship power. Regardless of the  
56  
57  
58  
59  
60

1  
2  
3 confounders controlled for, all but one study found a positive direction of association and  
4  
5 reported varying magnitudes of association.  
6  
7

### 8 9 ***IPV and hard drug use (crack, cocaine, heroin)***

10 Four studies examined the relationship between recent IPV and hard drug use, of which one  
11  
12 reported an association in both directions. Two studies provided two estimates of IPV and  
13  
14 later hard drug use, both of which showed a positive direction of association although only  
15  
16 one was statistically significant [21, 40]. The pooled OR from these studies was 2.05 (95% CI  
17  
18 1.19-3.52,  $I^2 = 0.0\%$ ,  $p=0.948$ ). Three studies provided four estimates of hard drug use and  
19  
20 later IPV, which showed a positive direction of association and three of these were  
21  
22 statistically significant [14, 21, 28]. Three of these estimates were included in the meta-  
23  
24 analysis, resulting in a pooled OR of 2.20 (95% CI 1.52-3.17,  $I^2 = 0.0\%$ ,  $p=0.455$ ).  
25  
26  
27  
28  
29  
30  
31

32 **Hard drug use measurement:** Of the two estimates that measured IPV and subsequent hard  
33  
34 drug use, one study measured drug use in the last 12 months and the other in the last 6  
35  
36 months. Of the four estimates that measured hard drug use and subsequent IPV, two assessed  
37  
38 use in the last 12 months and two in the last six months. Of the four studies, two used the  
39  
40 Drug Use and Risk Behaviour Questionnaire [14, 21] and two asked about use of specific  
41  
42 hard drugs including crack, cocaine and heroin [28, 40]. Of the latter, one of the studies used  
43  
44 two methods for assessing hard drug use at each wave including self-report information only  
45  
46 and combined self-report and toxicological information [40].  
47  
48  
49  
50  
51

52 **Common risk factors/confounding:** Of the two estimates that measured IPV and subsequent  
53  
54 hard drug use, one controlled for time one levels of hard drug use. Of the four estimates that  
55  
56 measured hard drug use and subsequent IPV, three controlled for time levels of IPV. All four  
57  
58  
59  
60

1  
2  
3 studies controlled for socio-demographic factors. El-Bassel [21] controlled for childhood  
4 sexual abuse, post-traumatic stress disorder, multiple concurrent partners and frequency of  
5 condom use. Gilbert [14] controlled for childhood sexual abuse, psychological distress,  
6 coping strategies, the partner's illicit drug use and binge drinking and sexual relationship  
7 power.  
8  
9  
10  
11  
12

### 13 *IPV and marijuana use*

14  
15  
16 Four studies examined the relationship between recent IPV and marijuana use, of which two  
17 studies reported an association in both directions. Three studies provided three estimates of  
18 IPV and subsequent marijuana use, all showing a positive direction of association, although  
19 none were statistically significant [14, 16, 21]. Two of these studies were included in the  
20 meta-analysis resulting in a pooled OR of 1.52 (95% CI 1.04-2.24,  $I^2 = 5.4%$ ,  $p=0.304$ ).  
21  
22

23 Three studies provided four estimates of marijuana use and subsequent IPV [14, 21, 28] of  
24 which one showed a positive and statistically significant relationship. Three of these  
25 estimates were included in the meta-analysis, resulting in a pooled OR of 1.96 (95% CI 0.8-  
26 4.83). This was heterogeneous ( $I^2 = 85.4%$ ,  $p=0.001$ ).  
27  
28  
29

30  
31  
32 **Marijuana use measurement:** Of the four studies, two measured marijuana use in the last  
33 12 months and two in the last six months. All studies used self-report information to assess  
34 for marijuana use.  
35  
36  
37  
38  
39

40  
41  
42 **Common risk factors/confounding:** Of the three estimates that measured IPV and  
43 subsequent marijuana use, two controlled for time levels of marijuana use. Of the four  
44 estimates that measured marijuana use and subsequent IPV, three controlled for time levels of  
45 IPV. All the studies controlled for socio-demographic factors. El-Bassel [21] controlled for  
46  
47  
48  
49  
50  
51  
52  
53  
54  
55  
56  
57  
58  
59  
60

1  
2  
3 childhood sexual abuse, post-traumatic stress disorder, multiple concurrent partners and  
4 frequency of condom use. Gilbert [14] controlled for childhood sexual abuse, psychological  
5 distress, coping strategies, the partner's illicit drug use and binge drinking and sexual  
6 relationship power.  
7  
8  
9  
10

### 11 12 13 ***IPV and STIs (excluding HIV)***

14  
15 Three studies provided three estimates of the association between recent IPV and later STIs,  
16 of which one showed a positive and statistically significant relationship [20, 38, 44]. The  
17 meta-analysis of two of these studies resulted in a pooled OR of 1.10 (95% CI 0.56-2.18,  $I^2 =$   
18 35.5%,  $p=0.214$ ).  
19  
20  
21  
22  
23  
24  
25  
26

27 **STI measurement:** One study assessed for STIs (chlamydia, gonorrhoea or trichomoniasis)  
28 within the last three months using biological measures [38], another relied on self-report to  
29 assess for STIs at the last wave [20] and the third study assessed women quarterly for  
30 gonorrhoeae, chlamydia or trichomoniasis [44].  
31  
32  
33  
34  
35  
36  
37

38 **Common risk factors/confounding:** All studies controlled for socio-demographic factors.  
39 El-Bassel's study [21] of women attending a methadone maintenance clinic adjusted for time  
40 one HIV risk factors (i.e. frequency of condom use, frequency of requesting condom use,  
41 having unprotected anal sex, exchanging sex for drugs, being HIV positive and having had a  
42 sexually transmitted infection), as well as drug and alcohol use. Chowdhary & Patel [38]  
43 removed women with an STI at time one from the analysis. However, this would likely have  
44 introduced bias in the resulting cases, as it would have excluded women with IPV that  
45 preceded the acquisition of an STI at baseline. Wilson's [44] study of HIV positive sex  
46 workers did not control for time one sexual risk behaviours, although it did control for a  
47  
48  
49  
50  
51  
52  
53  
54  
55  
56  
57  
58  
59  
60



lifetime history of sexual violence since the age of 15 by someone other than the index partner. Figure 4 presents the forest plots for alcohol use, hard drug use, marijuana use and STIs.

**Figure 4: Forest plot estimates of the association between IPV and alcohol use, hard drug use, marijuana use and sexually transmitted infections**

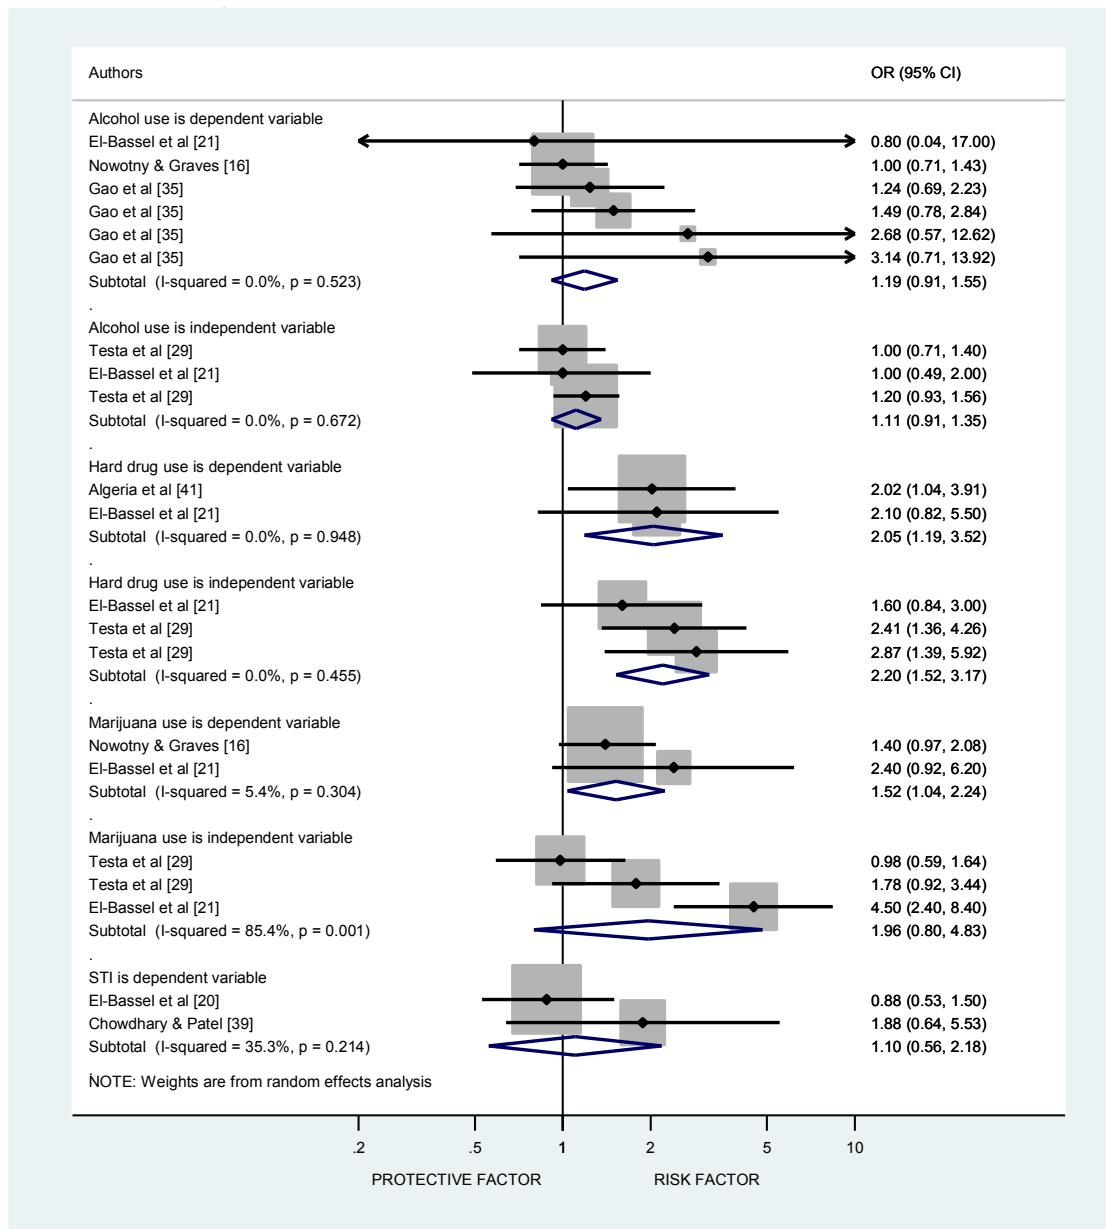

Note: Estimates from Gao and Testa are based on different sub-samples and are mutually exclusive

## Discussion

### *Summary of main findings*

Our review identified cohort studies that examined the relationship between recent IPV (i.e. IPV occurring up to and including the last 12 months) and depression, postpartum depression, alcohol use, hard drug use, marijuana use and STIs. Although a few other health or health related outcomes were identified (i.e. sexual risk behaviours, HIV infection, general anxiety and gynaecological problems) these could not be included in a meta-analysis because there was very little evidence (only one or two estimates). We found evidence consistent with a bi-directional relationship between recent IPV and depressive symptoms. Recent IPV was also associated with increased symptoms of postpartum depression. There was some evidence of a bi-directional relationship between recent IPV and hard drug use, and IPV and subsequent marijuana use although there were a limited number of studies. There was no evidence of an association between recent IPV and alcohol or sexually transmitted infections (STIs) although the evidence was weak with few studies and inconsistent measurement of alcohol and STIs.

Although the search strategy did not limit the types of health outcomes identified, the review found no cohort studies for recent IPV exposure and non-communicable diseases such as cardiovascular disease, hypertension and obesity. Nor did we find longitudinal evidence for recent experience of IPV and posttraumatic stress disorder or anxiety disorder. There is limited evidence from cross-sectional data that lifetime IPV increases the risk of cardiovascular disease [49]. Cohort studies measuring past history of IPV have reported an association with increased body mass index [50], increased risk for cardiovascular disease [51] and hypertension [52]. Physiological mechanisms may explain the association between IPV and some adverse health outcomes through complex neural, neuroendocrine and immune

1  
2  
3 responses to acute and chronic stress. For example, sustained and acute elevated stress levels  
4  
5 have been linked to cardiovascular disease, hypertension, gastrointestinal disorders and  
6  
7 chronic pain. When exposed to prolonged or acute stress, areas of the brain (e.g.  
8  
9 hippocampus, amyglada and prefrontal cortex) undergo structural changes that can impact on  
10  
11 mental and cognitive functioning, which can lead to mental disorders [53].  
12  
13

14  
15  
16 We found evidence consistent with a bi-directional relationship between recent experience of  
17  
18 IPV and depressive symptoms. The magnitude of the association in either direction is similar  
19  
20 to that reported in our previous review of 'ever' IPV and depressive symptoms[4] although  
21  
22 there were fewer estimates in our meta-analysis of recent IPV and depressive symptoms.  
23  
24

25  
26  
27 All the studies on postpartum depressive symptoms conceptualised IPV as the dependent  
28  
29 variable and there was evidence that recent experience of IPV or IPV during pregnancy  
30  
31 increased symptoms of postpartum depression although there was substantial heterogeneity.  
32  
33 The magnitude of the association was lower (OR=1.84, 95% CI 1.08-3.15) compared to  
34  
35 Howard et al. [54] who reported a three-fold increase in the levels of depressive symptoms in  
36  
37 the postnatal period after having experienced IPV during pregnancy (OR=3.1, 95% CI 2.7-  
38  
39 3.6). However, the authors state that study heterogeneity and lack of data on baseline  
40  
41 symptoms prevented conclusions on temporality.  
42  
43  
44

45  
46  
47 There was no evidence of an association between recent IPV and alcohol use in either  
48  
49 direction. This might be because there were fewer estimates in the meta-analysis of recent  
50  
51 IPV and measurement of problematic alcohol use was conceptualised in a number of different  
52  
53 ways which may have diluted the effect, for example, binge drinking, heavy episodic  
54  
55 drinking and high risk alcohol use. None of the estimates in the meta-analysis measured  
56  
57  
58  
59  
60

1  
2  
3 alcohol use disorder. Furthermore, few estimates in the meta-analysis controlled for time one  
4  
5 levels of IPV or alcohol use, and none included the perpetrator's alcohol use which may be  
6  
7 related to IPV and/or the woman's drinking behaviour. This finding is in contrast to our  
8  
9 previous review of 'ever' IPV and alcohol which did find evidence consistent with a bi-  
10  
11 directional relationship.[5] The review found evidence consistent with a bi-directional  
12  
13 relationship between recent IPV and hard drug use. However, this finding should be treated  
14  
15 with caution as there were very few studies overall, and one of the studies was based on a  
16  
17 sample of women attending a methadone maintenance clinic. For marijuana use, there were  
18  
19 few studies, but the evidence suggests that IPV predicts subsequent marijuana use. Pooled  
20  
21 estimates did not support that marijuana use predicts subsequent IPV, although estimates  
22  
23 were heterogeneous. The evidence for recent IPV and STI infection was in conflicting  
24  
25 directions and there were only two estimates.  
26  
27  
28  
29  
30  
31

### 32 **Limitations of the review**

33  
34 To our knowledge, this is the first systematic review of cohort studies to measure the  
35  
36 magnitude of the association between recent exposure to IPV and health outcomes. Although  
37  
38 we conducted an extensive search of the global literature, the review has a number of  
39  
40 limitations. Due to the large number of abstracts retrieved and the limited timeframe for the  
41  
42 review, we were not able to employ double screening of abstracts. However, two researchers  
43  
44 conducted the review of full text papers. One researcher was responsible for extracting data  
45  
46 from included papers and we did not contact authors for additional information. As some  
47  
48 studies measured the outcome variable (either IPV or the health condition) continuously, it  
49  
50 was not possible to combine all measures of effect, which limited the number of studies in the  
51  
52 meta-analyses. However, we comment on the direction of the association of studies that were  
53  
54 not included in the meta-analysis in the results section for each health condition. It was not  
55  
56  
57  
58  
59  
60

1  
2  
3 possible to quantitatively assess publication bias as too few studies were in the meta-analyses  
4  
5 of each health condition.  
6  
7

### 8 9 **Sources of bias and limitations of included studies**

10 One of the main limitations of the included studies relates to the lack of consistency in  
11  
12 controlling for key potential confounders. With regard to studies on depression, hard drug use  
13  
14 and marijuana use, most controlled for time one levels of the health condition or IPV (where  
15  
16 IPV was the dependent variable). Far fewer of the estimates on IPV and later alcohol use and  
17  
18 IPV and STI controlled for time one levels of the health outcome.  
19  
20  
21

22  
23  
24  
25 With regard to the studies on depressive symptoms, only two controlled for early childhood  
26  
27 trauma (i.e. childhood sexual and/or physical abuse) and two controlled for alcohol use, even  
28  
29 though both are known to increase the risk for depression [55] [56]. This makes it difficult to  
30  
31 rule them out as potential contributors to the causation of the outcomes. Nevertheless, we  
32  
33 found that studies showed a positive direction of association, regardless of which variables  
34  
35 were adjusted for, and there was no clear pattern of differing magnitude of association that  
36  
37 indicated the relationship between IPV and depressive symptoms were not likely to be  
38  
39 entirely accounted for by shared risk factors.  
40  
41  
42  
43  
44

45 Little is known about the potential causal mechanisms between depression and subsequent  
46  
47 IPV. However, women who are depressed may experience symptoms (e.g. lethargy and  
48  
49 withdrawal) that impact their capacity for engaging in self-care behaviours including help-  
50  
51 seeking and contact with health care providers and subsequently extricating herself from the  
52  
53 relationship. It is also plausible that earlier, perhaps unmeasured experiences of violence,  
54  
55 such as childhood sexual abuse and trauma are causing depression and later IPV, or that  
56  
57  
58  
59  
60

1  
2  
3 depression is mediating the relationship between childhood sexual abuse and later IPV. A  
4  
5 path analysis with cross-sectional data supports this hypothesis [56], but few longitudinal  
6  
7 studies have explored these relationships.  
8  
9

10  
11 Only two studies on alcohol use controlled for childhood sexual abuse and one controlled for  
12  
13 the partner's level of alcohol use, both of which are potential causes of women's alcohol use.  
14  
15 It has been suggested that women who drink heavily are more likely to have a partner who  
16  
17 drinks heavily, which can increase their risk of IPV because heavy alcohol use by men is  
18  
19 associated with IPV perpetration [57]. This can occur because people tend to choose a partner  
20  
21 with similar drinking patterns to themselves or through the influence of their partner's  
22  
23 drinking patterns and expectations [58]. Research also suggests that the partner's or the  
24  
25 woman's drinking may fuel conflict in the relationship. A nationally representative study  
26  
27 from the US found that couples with similar drinking patterns (e.g. both abstinent or both  
28  
29 binge drinkers) were less likely to experience IPV in their relationship compared to those  
30  
31 with discordant drinking habits [59]. This implies that relationship conflict may result in IPV,  
32  
33 as opposed to alcohol use alone because high alcohol use would be more predictive than  
34  
35 discordant use. Alcohol use was measured in a variety of ways with most assessing binge  
36  
37 drinking or heavy drinking and only two studies measuring alcohol dependence. Although  
38  
39 heavy alcohol consumption increases the risk for disease, injury and premature death [60, 61]  
40  
41 the adverse consequences may vary considerably between people who sporadically drink  
42  
43 heavily and those who develop an alcohol use disorder. Although the evidence points to a bi-  
44  
45 directional relationship between IPV and hard drug use and IPV and marijuana use there were  
46  
47 too few estimates. Women may self-medicate with alcohol, tobacco or drugs in an attempt to  
48  
49 cope with the trauma and stress of living in an abusive relationship, which in themselves are  
50  
51 important risk factors for poor health. However, alcohol or drug use by the abuser or the  
52  
53  
54  
55  
56  
57  
58  
59  
60

1  
2  
3 woman has also been identified as a trigger to violent episodes or a factor that contributes to  
4  
5 more severe violence [62]. The evidence for the association between recent IPV and STIs is  
6  
7 uncertain.  
8  
9

10  
11 The majority of the studies were from high income countries, most notably the USA and only  
12  
13 six studies were from middle income countries where it is known that the prevalence of past  
14  
15 year IPV is higher. Six of the studies were of adolescents, again mostly in high income  
16  
17 countries, where these were likely to be dating relationships with no cohabitation. One study  
18  
19 included young girls and women. Experiences of IPV in adult and adolescent relationships  
20  
21 may be qualitatively different, in that there is a lower likelihood of experiencing systematic  
22  
23 and chronic violence in dating relationships [63]. About a third of the studies were drawn  
24  
25 from clinical settings, schools or were taken from sub-populations and therefore subject to  
26  
27 bias (e.g. HIV positive sex workers, women with depressive symptoms and women on  
28  
29 methadone maintenance). More population-based cohort studies are needed in order to  
30  
31 generalise the findings. Most studies measured physical violence and some modelled  
32  
33 exposure to physical and sexual and other forms of violence separately. However, other  
34  
35 forms of violence (e.g. emotional abuse, threats) may also be associated with some of the health  
36  
37 outcomes. Most studies constructed the reference categories for IPV as binary opposites,  
38  
39 meaning that some participants in the reference group may have been exposed to other forms  
40  
41 of IPV that were not measured or modelled. This can bias the effect estimates towards the  
42  
43 null and underestimate the magnitude of the association between recent IPV and health  
44  
45 outcomes. Some studies included only women who were in a relationship for all waves of  
46  
47 data collection. However, research shows that the prevalence of IPV is higher among women  
48  
49 who are no longer with abuser compared to those currently in a relationship [64] and  
50  
51 excluding these women may dilute the association between IPV and health outcomes.  
52  
53  
54  
55  
56  
57  
58  
59  
60

## Implications

The evidence on the association between exposure to IPV and mental and physical health outcomes has important implications for the delivery of interventions and services. IPV against women has received increasing attention by public health experts globally [2]. The results of this review indicates that health care providers and specialist IPV organisations should be aware of the bidirectional relationship between recent IPV and depression. Little is known about what pattern of exposure to IPV is more strongly associated with different health outcomes. In order to establish these connections, longitudinal studies of IPV and health are needed that distinguish recent violence with no prior history, from recent violence that is part of ongoing abuse, and historical violence that no longer occurs. Other factors that are known to mediate the relationship such as the duration and severity of IPV, childhood physical and sexual abuse, poverty related stress and risk behaviours such as alcohol and substance abuse should be carefully considered in analyses.



## Appendix 1

### Search Strategy from Medline

1. domestic violence/ or spouse abuse/
2. Battered Women/
3. (spous\* abuse or battered wom\*n or intimate partner violence or intimate partner abuse or dating violence or domestic abuse).mp. [mp=title, abstract, original title, name of substance word, subject heading word, keyword heading word, protocol supplementary concept word, rare disease supplementary concept word, unique identifier]
4. (intimate adj4 partner adj4 violence).tw.
5. (intimate adj4 partner adj4 abuse).tw.
6. ((partner or relationship or wom\$n or domestic or spous\*) adj4 (abus\* or violen\* victimi\* or batter\*)).mp. [mp=title, abstract, original title, name of substance word, subject heading word, keyword heading word, protocol supplementary concept word, rare disease supplementary concept word, unique identifier]
7. Rape/
8. sexual violence.tw.
9. sexual abuse.tw.
10. rape.tw.
11. cohort studies/ or follow-up studies/ or longitudinal studies/ or "national longitudinal study of adolescent health"/ or prospective studies/
12. longitudinal stud\*.tw.
13. cohort stud\*.tw.
14. panel stud\*.tw.
15. follow up stud\*.tw.
16. prospective stud\*.tw.
17. longitudinal analysis.tw.
18. (longitudinal adj3 analysis).tw.
19. cohort analysis.tw.
20. (cohort adj3 analysis).tw.
21. panel analysis.tw.
22. (panel adj3 analysis).tw.
23. time series.tw.
24. (longitudinal adj3 stud\*).tw.
25. (cohort adj3 stud\*).tw.
26. (panel adj3 stud\*).tw.
27. (follow up adj3 stud\*).tw.
28. (prospective adj3 stud\*).tw.
29. letter.pt.

1  
2  
3 30. editorial.pt.  
4

5 31. comment.pt.

6 32. 1 or 2 or 3 or 4 or 5 or 6 or 7 or 8 or 9 or 10  
7

8 33. 11 or 12 or 13 or 14 or 15 or 16 or 17 or 18 or 19 or 20 or 21 or 22 or 23 or 24 or 25 or 26  
9 or 27 or 28

10 34. 29 or 30 or 31  
11

12 35. 33 not 34  
13

14 **36. 32 and 35 (2,536)**  
15  
16  
17  
18  
19  
20  
21  
22  
23  
24  
25  
26  
27  
28  
29  
30  
31  
32  
33  
34  
35  
36  
37  
38  
39  
40  
41  
42  
43  
44  
45  
46  
47  
48  
49  
50  
51  
52  
53  
54  
55  
56  
57  
58  
59  
60

For peer review only

## Appendix 2

Table 3. Summary of studies of IPV experienced up to and including last 12 months and health outcomes in women

| Study, Participants, Country                     | Length of Follow-up, Number of Waves | Dependent Variable – IPV or health outcome | IPV Measure and Timeframe                                              | Health Outcome Measure and Timeframe                  | Effect Estimate                | Adjusted for Time 1 Health Outcome or IPV <sup>d</sup>           |
|--------------------------------------------------|--------------------------------------|--------------------------------------------|------------------------------------------------------------------------|-------------------------------------------------------|--------------------------------|------------------------------------------------------------------|
| <b>Depressive Symptoms</b>                       |                                      |                                            |                                                                        |                                                       |                                |                                                                  |
| Chuang et al. [13]; 1,420 adult women; USA       | 2 years; 2 waves                     | Depression                                 | Physical and/or sexual, CTS-like, last 12 months                       | Depression, CES-D, past week                          | aOR=1.88 (1.02-3.45)           | Yes                                                              |
| Chowdhary & Patel [38]; 1,750 adult women; India | 1 year; 3 waves                      | Depression                                 | Physical, CT-like, last 3 months                                       | Depressive disorder, ICD-10, currently suffering      | aOR=0.5 (0.07-3.79)            | No, but analysis removes women with baseline depressive disorder |
| Davidson et al. [30]; 494 adult women; Australia | 2 years; 2 waves                     | Depression                                 | Physical and/or sexual, CAS, last 12 months                            | Major Depressive Disorder, PHQ-9, past 2 weeks        | aOR=2.3 (1.03-5.12), p=0.04    | Yes                                                              |
| Kim & Lee [42]; 3,153 adult women; Korea         | 4 years; 4 waves                     | Depression                                 | “Physical violence and/or threat of physical violence”, last 12 months | Depression, CES-D, past week                          | Beta=-0.03, SE=0.01, p=0.004   | Yes                                                              |
| Newcomb et al. [23] 113 adult women; USA         | 1 year; 3 waves                      | Depression                                 | Psychological and/or physical, CTS, last 6 months                      | Depression, CES-D, period not specified               | Path coefficient=0.17, p=<0.05 | Yes                                                              |
| Suglia et al. [25]; 1,834 adult women; USA       | 3 years; 3 waves                     | Depression                                 | Physical and/or sexual, CTS-like, last 12 months                       | Depression, CIDI-SF, past 12 months                   | aOR=1.09 (0.6-1.9)             | Yes                                                              |
| Roberts et al. [22]; 2,206 adolescents; USA      | 1 year; 2 waves                      | Depression                                 | Physical, CTS, last 12 months                                          | Depression, CES-D, past week                          | Beta=0.18 (0.1-0.26) p<0.05    | Yes                                                              |
| Taft et al. [31]; 9,683 adult women; Australia   | 4 years; 2 waves                     | Depression                                 | Physical and/or sexual, CTS, last 12 months                            | Depression, CES-D, past week                          | aOR=2.12 (1.69-2.65)           | Yes                                                              |
| Zlotnick et al. [19] 3,104 adult women; USA      | 5 years; 2 waves                     | Depression                                 | Physical, CTS-like, last 12 months                                     | Depression, CES-D, past week                          | Beta=6.69, p=0.003             | Yes                                                              |
| Foshee et al. 2004 [24]; 1,291 adolescents; USA  | 4-5 years; 4-5 waves                 | IPV                                        | Sexual dating violence, CTS like, last 12 months                       | Depression symptoms “Kandel and Davis”, last 6 months | HR=1.35 (1.05-1.74)            | Yes                                                              |
| Kim & Lee [23]; 3,153 adult women; Korea         | 4 years; 4 waves                     | IPV                                        | “Physical violence and/or threat of physical violence”, last 12 months | Depression, CES-D, past week                          | Beta=3.34, SE=0.61, p<0.001    | Yes                                                              |
| Leher et al. 2006 [17]; 1,659 adolescents; USA   | 7 years; 3 waves                     | IPV                                        | Physical, CTS-like, last 12 months                                     | CES-D, past week                                      | aOR=1.86 (1.05-3.29)           | Yes                                                              |
| Levendosky et al. [26] 150 adult women; USA      | 4 years; 5 waves                     | IPV                                        | Physical and/or sexual, last 12 months, SVAWS                          | BDI, time period not specified                        | R=0.23, p<0.05                 | No                                                               |

| Study, Participants, Country                                        | Length of Follow-up, Number of Waves | Dependent Variable – IPV or health outcome | IPV Measure and Timeframe                                                     | Health Outcome Measure and Timeframe                                   | Effect Estimate                                                                                                                                                               | Adjusted for Time 1 Health Outcome or IPV <sup>d</sup> |
|---------------------------------------------------------------------|--------------------------------------|--------------------------------------------|-------------------------------------------------------------------------------|------------------------------------------------------------------------|-------------------------------------------------------------------------------------------------------------------------------------------------------------------------------|--------------------------------------------------------|
| Nduna et al. 2010 [36]; 995 women and girls; South Africa           | 1 year; 2 waves                      | IPV                                        | Physical and/or sexual, CTS-like (WHO), last 12 months                        | CES-D, past week                                                       | aOR=1.67 (1.18-2.36)                                                                                                                                                          | Yes                                                    |
| <b>Postpartum Depression</b>                                        |                                      |                                            |                                                                               |                                                                        |                                                                                                                                                                               |                                                        |
| Escriva-Aguir et al. [41]; 888 pregnant women; Spain                | 1 year; 4 waves                      | Postpartum depression                      | Psychological, Abuse AAS, past 12 months                                      | Postpartum depression, EPDS, past 12 months                            | aOR=4.11 (1.23-13.73)                                                                                                                                                         | Yes                                                    |
| Flach et al. [46]; 5,681 pregnant women; United Kingdom             | 3.5 years; 5 waves                   | Postpartum depression                      | Has a partner physically hurt and/or been emotionally cruel, during pregnancy | Postnatal depression, EPDS, past 7 days (asked at 8 weeks postpartum)  | aOR=1.29 (1.02-1.63)                                                                                                                                                          | Yes                                                    |
| Kita et al. [45]; 562 adult women; Japan                            | 1 month; 2 waves                     | Postpartum depression                      | Physical and/or non-physical, during pregnancy, ISA                           | Postnatal depression, HADS, past 7 days                                | Path coefficients:<br>Antenatal IPV and postnatal depression=0.10 (NS);<br>Antenatal IPV and antenatal depression=0.31;<br>Antenatal depression and postnatal depression=0.57 | Yes                                                    |
| Patel et al. [39]; 235 pregnant women; India                        | 6 months; 3 waves                    | Postpartum depression                      | “Marital violence” during pregnancy                                           | Postnatal depression, EPDS, past 7 days (asked at 6 months)            | RR=2.6 (1.6-4.3)<br>p=0.001                                                                                                                                                   | No                                                     |
| Tsai et al. [37]; 958 pregnant women; South Africa                  | 3 years; 4 waves                     | Postpartum depression                      | Physical, CTS, last 12 months                                                 | Postpartum Depression, EPDS, past 7 days                               | Coefficient=1.04 (0.61-1.47)                                                                                                                                                  | Yes                                                    |
| <sup>b</sup> Woolhouse et al. [32]; 1,102 pregnant women; Australia | 4 years; 6 waves                     | Postpartum depression                      | Physical and/or emotional, CAS, last 12 months                                | Depression in the 1st year postpartum only, EPDS                       | aOR=0.75 (0.4-1.6)                                                                                                                                                            | Yes                                                    |
| <sup>b</sup> Woolhouse et al. [33]; 1,102 pregnant women; Australia | 4 years; 6 waves                     | Postpartum depression                      | Physical and/or emotional, CAS, last 12 months                                | Depression at 4 years postpartum only, EPDS                            | aOR=3.48 (2.0-6.1)                                                                                                                                                            | Yes                                                    |
| <sup>b</sup> Woolhouse et al. [33]; 1,102 pregnant women; Australia | 4 years; 6 waves                     | Postpartum depression                      | Physical and/or emotional, CAS, last 12 months                                | Depression in the 1 <sup>st</sup> year and at 4 years postpartum, EPDS | aOR=2.18 (1.2-3.8)                                                                                                                                                            | Yes                                                    |
| <b>Study, Participants,</b>                                         | <b>Length of</b>                     | <b>Dependent</b>                           | <b>IPV Measure and</b>                                                        | <b>Health Outcome Measure</b>                                          | <b>Effect Estimate</b>                                                                                                                                                        | <b>Adjusted for</b>                                    |

| Country                                                   | Follow-up, Number of Waves | Variable – IPV or health outcome | Timeframe                                               | and Timeframe                                                                                                                        |                               | Time 1 Health Outcome or IPV <sup>d</sup> |
|-----------------------------------------------------------|----------------------------|----------------------------------|---------------------------------------------------------|--------------------------------------------------------------------------------------------------------------------------------------|-------------------------------|-------------------------------------------|
| Tsai et al. [37]; 958 pregnant women; South Africa        | 3 years; 4 waves           | IPV                              | Physical, CTS, last 12 months                           | Postpartum Depression, EPDS, past 7 days                                                                                             | Beta=0.054 (0.030-0.079)      | Yes                                       |
| <b>Suicide Attempts</b>                                   |                            |                                  |                                                         |                                                                                                                                      |                               |                                           |
| Chowdhary & Patel [38]; 1,750 adult women; India          | 1 year; 3 waves            | Suicide attempts                 | Physical, CT-like, last 3 months                        | Single question, ever attempted suicide                                                                                              | aOR=7.97 (1.75-36.37)         | Yes                                       |
| Roberts et al. [23]; 2,206 adolescents; USA               | 1 year; 2 waves            | Suicide attempts                 | Verbal, threats, physical, CTS, last 12 months          | Single question, ever attempted suicide                                                                                              | Beta=0.12 (0.02-0.22)         | Yes                                       |
| <b>Perceived Stress</b>                                   |                            |                                  |                                                         |                                                                                                                                      |                               |                                           |
| Salzaar et al. [43]; 398 adults; Nicaragua                | 3 years; 2 waves           | Perceived emotional distress     | Emotional, physical, sexual, WHO Survey, last 12 months | Perceived emotional distress, SRQ,                                                                                                   | OR=4.59 (2.5-8.45) calculated | No                                        |
| <sup>b</sup> Testa et al. 2001 [27]; 494 adult women; USA | 2 years; 2 waves           | Perceived stress                 | Verbal aggression, CTS, last 12 months                  | Perceived Stress, Cohen et al. 1983 a 14-item measure, past 6 months                                                                 | Beta=0.18; p<0.001            | Yes                                       |
| <sup>b</sup> Testa et al. 2001 [27]; 494 adult women; USA | 2 years; 2 waves           | Perceived stress                 | Physical aggression, CTS, last 12 months                | Perceived Stress, Cohen et al. 1983 a 14-item measure, past 6 months                                                                 | Beta=0.11; p<0.05             | Yes                                       |
| <b>General Anxiety</b>                                    |                            |                                  |                                                         |                                                                                                                                      |                               |                                           |
| Suglia et al. [25]; 1,834 adult women; USA                | 3 years; 3 waves           | General anxiety                  | Physical and/or sexual, CTS-like, past 12 months        | Single question, asking if they had a period of 6 months or more when they felt worried, tense or anxious                            | aOR=1.95 (1-3.8)              | Yes                                       |
| <b>Self-Perceived Health Status</b>                       |                            |                                  |                                                         |                                                                                                                                      |                               |                                           |
| Escriba-Aguir et al. [41]; 888 pregnant women; Spain      | 1 year; 4 waves            | Self-perceived health status     | Psychological, Abuse AAS, past 12 months                | Current self-perceived health status, asking respondents to describe their general health as: very good; good; fair; poor; very poor | aOR=4.32 (1.58-11.87)         | Yes                                       |
| <b>Hard Drug use (Cocaine, Crack, Heroin)</b>             |                            |                                  |                                                         |                                                                                                                                      |                               |                                           |
| Algeria et al. [40]; 452 adult women; Puerto Rico         | 3 years; 3 waves           | Hard drug use                    | Physical and/or psychological, CTS, last 12 months      | Hard core drug use, self-report of crack or cocaine, heroin, past 12 months                                                          | aOR=2.02 (1.04-3.91)          | Yes                                       |
| El-Bassel et al. [21]; 317 adult women; USA               | 1 year; 3 waves            | Hard drug use                    | Physical and/or sexual, CTS, last 6 months              | “Drug Use and Risk Behaviour Questionnaire”, Cocaine use once a week or more, last 6 months                                          | aOR=2.10 (0.82-5.5)           | No                                        |

| Study, Participants, Country                              | Length of Follow-up, Number of Waves | Dependent Variable – IPV or health outcome | IPV Measure and Timeframe                       | Health Outcome Measure and Timeframe                                                                 | Effect Estimate      | Adjusted for Time 1 Health Outcome or IPV <sup>d</sup> |
|-----------------------------------------------------------|--------------------------------------|--------------------------------------------|-------------------------------------------------|------------------------------------------------------------------------------------------------------|----------------------|--------------------------------------------------------|
| El-Bassel et al. [21]; 317 adult women; USA               | 1 year; 3 waves                      | IPV                                        | Physical and/or sexual, CTS, last 6 months      | “Drug Use and Risk Behaviour Questionnaire”, Crack use once a week or more, last 6 months            | aOR=1.6 (0.83-3.0)   | No                                                     |
| <sup>a</sup> Gilbert et al. [14]; 185 adult women; USA    | 1 year; 3 waves                      | IPV                                        | Physical, injurious, sexual, CTS, last 6 months | “Drug Use and Risk Behaviour Questionnaire”, Hard drug use (cocaine, crack or heroin), last 6 months | RR=1.6 (1.08-2.36)   | Yes                                                    |
| <sup>b</sup> Testa et al. [28] 724 adult women; USA       | 1 year; 2 waves                      | IPV                                        | Minor violence, CTS, last 12 months             | Hard drug use, past year                                                                             | aOR=2.41 (1.36-4.26) | Yes                                                    |
| <sup>b</sup> Testa et al. [28] 724 adult women; USA       | 1 year; 2 waves                      | IPV                                        | Severe violence, CTS, last 12 months            | Hard drug use, past year                                                                             | aOR=2.87 (1.39-5.92) | Yes                                                    |
| <b>Marijuana Use</b>                                      |                                      |                                            |                                                 |                                                                                                      |                      |                                                        |
| El-Bassel et al. [21]; 317 adult women; USA               | 1 year; 3 waves                      | Marijuana use                              | Physical and/or sexual, CTS, last 6 months      | “Drug Use and Risk Behaviour Questionnaire”, Marijuana use once a week or more, last 6 months        | aOR=2.4 (0.92-6.2)   | No                                                     |
| <sup>a</sup> Gilbert et al. [14]; 185 adult women; USA    | 1 year; 3 waves                      | Marijuana use                              | Physical, CTS, last 6 months                    | “Drug Use and Risk Behaviour Questionnaire”, Marijuana use, last 6 months                            | RR=1.14 (0.81-1.6)   | Yes                                                    |
| <sup>a</sup> Nowotny & Graves [16] 2,959 adolescents; USA | 6 years; 2 waves                     | Marijuana use                              | Sexual, CTS-like, last 12 months                | Marijuana use (any), last 12 months                                                                  | aOR=1.4 (0.97-2.08)  | Yes                                                    |
| El-Bassel et al. [22]; 317 adult women; USA               | 1 year; 3 waves                      | IPV                                        | Physical and/or sexual, CTS, last 6 months      | “Drug Use and Risk Behaviour Questionnaire”, Marijuana use once a week or more, last 6 months        | aOR=4.5 (2.4-8.4)    | No                                                     |
| <sup>a</sup> Gilbert et al. [14]; 185 adult women; USA    | 1 year; 3 waves                      | IPV                                        | Physical, injurious, sexual, CTS, last 6 months | “Drug Use and Risk Behaviour Questionnaire”, Hard drug use (cocaine, crack or heroin), last 6 months | RR=0.94 (0.71-1.24)  | Yes                                                    |
| <sup>b</sup> Testa et al. [28] 724 adult women; USA       | 1 year; 2 waves                      | IPV                                        | Minor violence, CTS, last 12 months             | Marijuana use, past year                                                                             | aOR=0.98 (0.59-1.64) | Yes                                                    |

| Study, Participants, Country                                                                 | Length of Follow-up, Number of Waves | Dependent Variable – IPV or health outcome | IPV Measure and Timeframe                         | Health Outcome Measure and Timeframe                                                                                         | Effect Estimate               | Adjusted for Time 1 Health Outcome or IPV <sup>d</sup> |
|----------------------------------------------------------------------------------------------|--------------------------------------|--------------------------------------------|---------------------------------------------------|------------------------------------------------------------------------------------------------------------------------------|-------------------------------|--------------------------------------------------------|
| <sup>b</sup> Testa et al. [28] 724 adult women; USA                                          | 1 year; 2 waves                      | IPV                                        | Severe violence, CTS, last 12 months              | Marijuana use, past year                                                                                                     | aOR=1.78 (0.92-3.44)          | Yes                                                    |
| <b>Other combinations of illicit drug use (not restricted to Class A) and/or alcohol use</b> |                                      |                                            |                                                   |                                                                                                                              |                               |                                                        |
| <sup>a</sup> Gilbert et al. [14]; 185 adult women; USA                                       | 1 year; 3 waves                      | IPV                                        | Physical, injurious, sexual, CTS, last 6 months   | “Drug Use and Risk Behaviour Questionnaire”, any illicit drug use, last 6 months                                             | RR=1.15 (0.83-1.58)           | Yes                                                    |
| <sup>a</sup> Gilbert et al. [14]; 185 adult women; USA                                       | 1 year; 3 waves                      | Any illicit drug use                       | Physical, CTS, last 6 months                      | “Drug Use and Risk Behaviour Questionnaire”, any illicit drug use, last 6 months                                             | RR=0.9 (0.65-1.26)            |                                                        |
| Newcomb et al. [23]; 113 adult women; USA                                                    | 1 year; 3 waves                      | Any illicit drug use                       | Psychological and/or physical, CTS, past 6 months | Participants asked if they had ever used 16 illegal drugs including cocaine, crack, heroin, marijuana and others not listed. | Path coefficient=0.18, p<0.05 | Yes                                                    |
| <sup>a</sup> Nowotny & Graves [16]; 2,959 adolescents; USA                                   | 6 years; 2 waves                     | Any illicit drug use                       | Physical, CTS-like, last 12 months                | Drug use (MDMA, inhalents, LSD, heroin, PCP or other illegal drugs), last 12 months                                          | aOR=1.3 (0.8-2.15)            | Yes                                                    |
| Roberts et al. [22]; 2,206 adolescents; USA                                                  | 1 year; 2 waves                      | Illicit substance use                      | Physical, CTS, last 12 months                     | Illicit substance use measuring overall tobacco, alcohol and marijuana use, last 12 months                                   | Beta=0.16 (0.06-2.26), p<0.05 | Yes                                                    |
| <b>Alcohol Use</b>                                                                           |                                      |                                            |                                                   |                                                                                                                              |                               |                                                        |
| <sup>b</sup> Boden et al. [47]; 630 adult women; New Zealand                                 | 10 years; 4 waves used               | Alcohol abuse or dependence                | Physical and/or sexual, CTS, last 12 months       | CIDI – 1 to 2 symptoms versus none, last 12 months                                                                           | IRR=1.58 (1.37-1.82)          | No                                                     |
| <sup>b</sup> Boden et al. [47]; 630 adult women; New Zealand                                 | 10 years; 4 waves used               | Alcohol abuse or dependence                | Physical and/or sexual, CTS, last 12 months       | CIDI – 3 to 5 symptoms versus none, last 12 months                                                                           | IRR=2.5 (1.88-2.89)           | No                                                     |
| <sup>b</sup> Boden et al. [47]; 630 adult women; New Zealand                                 | 10 years; 4 waves used               | Alcohol abuse or dependence                | Physical and/or sexual, CTS, last 12 months       | CIDI – > 5 symptoms versus none, last 12 months                                                                              | IRR=3.38 (2.57-6.03)          | No                                                     |
| El-Bassel et al. [21] 317 adult women; USA                                                   | 1 year; 3 waves                      | Binge drinking                             | Physical and/or sexual, CTS, last 6 months        | Binge drinking – drinking 4 or more alcoholic drinks within a 6-hour period) once a week or more in the past 6 months        | aOR=0.80 (0.04-17.0)          | No                                                     |

| Study, Participants, Country                               | Length of Follow-up, Number of Waves | Dependent Variable – IPV or health outcome | IPV Measure and Timeframe                                                       | Health Outcome Measure and Timeframe                                                                                                                 | Effect Estimate                      | Adjusted for Time 1 Health Outcome or IPV <sup>d</sup> |
|------------------------------------------------------------|--------------------------------------|--------------------------------------------|---------------------------------------------------------------------------------|------------------------------------------------------------------------------------------------------------------------------------------------------|--------------------------------------|--------------------------------------------------------|
| <sup>b</sup> Gao et al. [34]; 636 adult women; New Zealand | 2 years; 2 waves                     | High risk alcohol use                      | Verbal aggression at 24 months postpartum only, CTS, last 12 months             | High risk alcohol use - drank 6 or more alcoholic drinks on at least one occasion in the last 12 months                                              | aOR=2.68 (0.57–12.62)                | No                                                     |
| <sup>b</sup> Gao et al. [34]; 636 adult women; New Zealand | 2 years; 2 waves                     | High risk alcohol use                      | Verbal aggression at 6 weeks and 24 months postpartum only, CTS, last 12 months | High risk alcohol use - drank 6 or more alcoholic drinks on at least one occasion in the last 12 months                                              | aOR=3.14 (0.71-13.92)                | No                                                     |
| <sup>b</sup> Gao et al. [34]; 636 adult women; New Zealand | 2 years; 2 waves                     | High risk alcohol use                      | Physical at 24 months postpartum only, CTS, last 12 months                      | High risk alcohol use - drank 6 or more alcoholic drinks on at least one occasion in the last 12 months                                              | aOR=1.24 (0.69-2.23)                 | No                                                     |
| <sup>b</sup> Gao et al. [34]; 636 adult women; New Zealand | 2 years; 2 waves                     | High risk alcohol use                      | Physical at 6 weeks and 24 months postpartum only, CTS, last 12 months          | High risk alcohol use - drank 6 or more alcoholic drinks on at least one occasion in the last 12 months                                              | aOR=1.49 (0.78-2.84)                 | No                                                     |
| <sup>a</sup> Gilbert et al. [14]; 185 adult women; USA     | 1 year; 3 waves                      | Binge drinking                             | Physical, CTS, last 12 months                                                   | “Drug Use and Risk Behaviour Questionnaire”, Binge drinking, last 6 months                                                                           | RR=1.4 (0.97-2.02)                   | Yes                                                    |
| Kieley et al. [15]; 195 couples; USA                       | 2.5 years; 2 waves                   | Alcohol dependence                         | Physical, CTS, last 12 months                                                   | ADS and MAST, last 12 months                                                                                                                         | Slope=0.011<br>Quadratic=0.001<br>NS | Yes                                                    |
| Kieley et al. [15]; 195 couples; USA                       | 2.5 years; 2 waves                   | Alcohol dependence                         | Verbal, CTS, last 12 months                                                     | ADS and MAST, last 12 months                                                                                                                         | Slope=-0.009<br>Quadratic=-0.006     | Yes                                                    |
| <sup>a</sup> Nowotny & Graves [16]; 2,959 adolescents; USA |                                      | Binge drinking                             | Threats, minor violence, CTS-like, last 12 months                               | Binge drinking: drinking five or more drinks during a single occasion at least two to three times a month in the past year                           | aOR=1.0 (0.71-1.43)                  | Yes                                                    |
| <sup>b</sup> Testa et al. 2001 [27]; 494 adult women; USA  | 2 years; 2 waves                     | Heavy drinking                             | Verbal aggression, CTS, last 12 months                                          | Alcohol consumption, average daily volume. Heavy drinking index, 6+ drinks single occasion and drinking to intoxication (continuous), last 12 months | Beta=-0.4; p<0.05                    | Yes                                                    |



| Study, Participants, Country                              | Length of Follow-up, Number of Waves | Dependent Variable – IPV or health outcome | IPV Measure and Timeframe                          | Health Outcome Measure and Timeframe                                                                                                                                                         | Effect Estimate                         | Adjusted for Time 1 Health Outcome or IPV <sup>d</sup> |
|-----------------------------------------------------------|--------------------------------------|--------------------------------------------|----------------------------------------------------|----------------------------------------------------------------------------------------------------------------------------------------------------------------------------------------------|-----------------------------------------|--------------------------------------------------------|
| <sup>b</sup> Testa et al. 2001 [27]; 494 adult women; USA | 2 years; 2 waves                     | Heavy drinking                             | Physical aggression, CTS, last 12 months           | Alcohol consumption, average daily volume. Heavy drinking index, 6+ drinks single occasion and drinking to intoxication (continuous), last 12 months                                         | Beta=0.09; p<0.05                       | Yes                                                    |
| Zlotnick et al. [19]; 2,905 adult women; USA              | 5 years; 2 waves                     | Alcohol use                                | Physical, CTS-like, last 12 months                 | National Survey of Alcohol and Drug Abuse Questions. Four items coded on a 6-point scale ranging from 0 (abstinent) to 3 (high moderate use) to 5 (binge drinking) past 30 days              | Correlation coefficient=1.45, mean=0.19 | Yes                                                    |
| Marsh-Buzy et al. [29]; 73 school students; USA           | 4 months, 2 waves                    | IPV                                        | Physical and/or sexual, CTS, past 4 months         | Alcohol use – quantity/frequency measure, past 4 months                                                                                                                                      | aOR=3.94; p=0.04                        | Yes                                                    |
| <sup>b</sup> Testa et al. 2003 [28]; 724 adult women; USA | 1 year; 2 waves                      | IPV                                        | Severe violence, CTS, last 12 months               | Heavy episodic drinking in past 12 months consisted of mean response to two questions on frequency of consuming 5 or more drinks in a single day and frequency of drinking until intoxicated | aOR=1.0 (0.71-1.4)                      | Yes                                                    |
| <sup>b</sup> Testa et al. 2003 [28]; 724 adult women; USA | 1 year; 2 waves                      | IPV                                        | Minor violence, CTS, last 12 months                | Heavy episodic drinking in past 12 months consisted of mean response to two questions on frequency of consuming 5 or more drinks in a single day and frequency of drinking until intoxicated | aOR=1.2 (0.93-1.56)                     | Yes                                                    |
| <b>HIV Infection</b>                                      |                                      |                                            |                                                    |                                                                                                                                                                                              |                                         |                                                        |
| El-Bassel et al. [20] 405 adult women; USA                | 1 year; 3 waves                      | HIV infection                              | Physical and/or sexual, last 6 months              | HIV positive status                                                                                                                                                                          | aOR=0.21 (0.3-1.6)                      | Yes                                                    |
| Jewkes et al. [35] 1,099 women and girls; South Africa    | 2 years; 3 waves                     | HIV infection                              | Physical and/or sexual, WHO Survey, last 12 months | HIV infection assessed with blood tests at all three waves                                                                                                                                   | IRR=1.51 (1.04-2.21)                    | Yes                                                    |

| Study, Participants, Country                     | Length of Follow-up, Number of Waves | Dependent Variable – IPV or health outcome | IPV Measure and Timeframe                   | Health Outcome Measure and Timeframe                                                                                                               | Effect Estimate      | Adjusted for Time 1 Health Outcome or IPV <sup>d</sup> |
|--------------------------------------------------|--------------------------------------|--------------------------------------------|---------------------------------------------|----------------------------------------------------------------------------------------------------------------------------------------------------|----------------------|--------------------------------------------------------|
| <b>Sexually Transmitted Infection</b>            |                                      |                                            |                                             |                                                                                                                                                    |                      |                                                        |
| Chowdhary & Patel [38]; 1,750 adult women; India | 1 year; 3 waves                      | STI                                        | Physical, CTS-like, last 3 months           | STI (chlamydia, gonorrhoea or trichomoniasis) biological testing, past 3 months                                                                    | aOR=1.88 (0.64-5.53) | No, but removes women who had STI at baseline          |
| El-Bassel et al. [20] 405 adult women; USA       | 1 year; 3 waves                      | STI                                        | Physical and/or sexual, CTS, last 6 months  | STI infection at wave 3                                                                                                                            | aOR=0.88 (0.53-1.5)  | Yes                                                    |
| Wilson et al. [44]; 389 adult women; Kenya       | Up to 2 years; unclear               | STI                                        | Physical and/or sexual, WHO, last 12 months | STI at quarterly examination, Presence of gonorrhoeae, chlamydia trachomatis, or trichomonas vaginalis detected by nucleic acid amplification test | aRR=0.88 (0.57-1.37) | No                                                     |
| <b>Sexual Risk Behaviour</b>                     |                                      |                                            |                                             |                                                                                                                                                    |                      |                                                        |
| El-Bassel et al. [20] 405 adult women; USA       | 1 year; 3 waves                      | Unprotected anal sex                       | Physical and/or sexual, last 6 months       | Unprotected anal sex                                                                                                                               | aOR=1.8 (0.58-5.5)   | Yes                                                    |
| El-Bassel et al. [20] 405 adult women; USA       | 1 year; 3 waves                      | Condom use consistency                     | Physical and/or sexual, last 6 months       | Condom use consistency                                                                                                                             | aOR=0.41 (0.24-0.71) | Yes                                                    |
| El-Bassel et al. [20] 405 adult women; USA       | 1 year; 3 waves                      | Condom request consistency                 | Physical and/or sexual, last 6 months       | Condom request consistency                                                                                                                         | aOR=0.42 (0.22-0.82) | Yes                                                    |
| El-Bassel et al. [20] 405 adult women; USA       | 1 year; 3 waves                      | Multiple concurrent partners               | Physical and/or sexual, last 6 months       | Multiple concurrent partners                                                                                                                       | aOR=3.1 (0.89-11.0)  | Yes                                                    |
| Teitelman et al. [48]; 2,629 adolescents; USA    | 7 years; 2 waves<br>Is it 2 waves    | HIV risk (condom use)                      | Verbal and/or physical, CTS, last 12 months | HIV risk (condom use), last 12 months                                                                                                              | aOR=1.59 (1.16-2.18) | Yes                                                    |
| Wilson et al. [44]; 389 adult women; Kenya       | Up to 2 years; unclear               | Unprotected anal and/or vaginal sex        | Physical and/or sexual, WHO, last 12 months | Unprotected anal and/or vaginal sex, past week                                                                                                     | aRR=1.91 (1.32-2.78) | No                                                     |
| Wilson et al. [44]; 389 adult women; Kenya       | Up to 2 years; unclear               | 100% condom use                            | Physical and/or sexual, WHO, last 12 months | 100% condom use, past week                                                                                                                         | aRR=0.90 (0.82-0.99) | No                                                     |
| Wilson et al. [44]; 389 adult women; Kenya       | Up to 2 years; unclear               | 2 or more sexual partners                  | Physical and/or sexual, WHO, last 12 months | 2 or more sexual partners, past week                                                                                                               | aRR=0.96 (0.76-1.21) | No                                                     |
| Wilson et al. [44]; 389 adult women; Kenya       | Up to 2 years; unclear               | 3 or more sex acts                         | Physical and/or sexual, WHO, last 12 months | 3 or more sex acts, past week                                                                                                                      | aRR=1.0 (0.79-1.26)  | No                                                     |
| Wilson et al. [44]; 389 adult women; Kenya       | Up to 2 years; unclear               | Semen detection                            | Physical and/or sexual, WHO, last 12 months | Semen detection by prostate specific antigen test PSA as a biomarker of unprotected sex                                                            | aRR=1.54 (1.17-2.04) | No                                                     |
| Wilson et al. [44]; 389 adult women; Kenya       | Up to 2 years; unclear               | No sex                                     | Physical and/or sexual, WHO, last 12 months | No sex in the past week                                                                                                                            | aRR=0.67 (0.54-0.83) |                                                        |

1  
2  
3  
4  
5  
6  
7  
8  
9  
10  
11  
12  
13  
14  
15  
16  
17  
18  
19  
20  
21  
22  
23  
24  
25  
26  
27  
28  
29  
30  
31  
32  
33  
34  
35  
36  
37  
38  
39  
40  
41  
42  
43  
44  
45  
46  
47  
48  
49

| Study, Participants, Country                                  | Length of Follow-up, Number of Waves | Dependent Variable – IPV or health outcome | IPV Measure and Timeframe         | Health Outcome Measure and Timeframe      | Effect Estimate      | Adjusted for Time 1 Health Outcome or IPV <sup>d</sup> |
|---------------------------------------------------------------|--------------------------------------|--------------------------------------------|-----------------------------------|-------------------------------------------|----------------------|--------------------------------------------------------|
| <b>Other health outcomes</b>                                  |                                      |                                            |                                   |                                           |                      |                                                        |
| <sup>a</sup> Chowdhary & Patel [38]; 1,750 adult women; India | 1 year; 3 waves                      | Abnormal vaginal discharge                 | Physical, CTS-like, last 3 months | Abnormal vaginal discharge, last 3 months | aOR=1.06 (0.44-2.58) | No, but removes women who had condition at baseline    |
| <sup>a</sup> Chowdhary & Patel [38]; 1,750 adult women; India | 1 year; 3 waves                      | Dysuria                                    | Sexual, CTS-like, last 3 months   | Dysuria, last 3 months                    | aOR=1.57 (0.6-4.14)  | No, but removes women who had condition at baseline    |
| <sup>a</sup> Chowdhary & Patel [38]; 1,750 adult women; India | 1 year; 3 waves                      | Lower abdominal pain                       | Physical, CTS-like, last 3 months | Lower abdominal pain, last 3 months       | aOR=1.2 (0.63-2.32)  | No, but removes women who had condition at baseline    |
| <sup>a</sup> Chowdhary & Patel [38]; 1,750 adult women; India | 1 year; 3 waves                      | Dyspareunia                                | Physical, CTS-like, last 3 months | Dyspareunia, last 3 months                | aOR=2.15 (0.8-5.82)  | No, but removes women who had condition at baseline    |

<sup>a</sup>More than one estimate reported in the study, but preference given to one estimate using the following algorithm: estimate derived from multivariate analysis; the definition of IPV closely matches that of other studies in the health outcome group; where the reference group was unexposed to any violence; where the estimate was most precise

<sup>b</sup>Estimates are mutually exclusive as based on different sub-samples

<sup>c</sup>p-value if no confidence interval reported

AAS, Abuse Assessment Screen; ADS, Alcohol Dependence Scale; BDI, Beck Depression Inventory; CAS, Composite Abuse Scale; CES-D, Center for Epidemiological Studies-Depression; CIDI-SF, Composite International Diagnostic Interview-Short Form; CTS, Conflict Tactics Scale; HADS, Hospital Anxiety and Depression Scale; ISA, Index of Spouse Abuse; MAST, Michigan Alcoholism Screening Test; PHQ-9, Patient Health Questionnaire; SRQ, Self-Report Questionnaire; SVAWS, Severity of Violence Against Women Scale

<sup>d</sup> Refers to the dependent variable

**Declarations****Ethics approval**

Not applicable

**Consent for publication**

Not applicable

**Availability of data and material**

All data generated or analysed during this study are included in this published article [and its supplementary files].

**Competing interests**

The authors declare that they have no competing interests.

**Funding**

The study received funding from Wellspring. Wellspring did not contribute to study design, data collection and analysis, interpretation of data or writing the manuscript.

**Authors' contributions**

Conceived and designed the study: LJB KD. Data collection: LJB. Analysed the data: LJB, KD. Wrote the first draft of the manuscript: LJB. Contributed to the writing of the manuscript: LJB CW KD MR. Agreed with manuscript results and conclusions: LJB CW KD MR.

**Acknowledgements**

None

## References

1. Devries, K.M., et al., *Global health. The global prevalence of intimate partner violence against women*. Science, 2013. **340**(6140): p. 1527-8.
2. World Health Organization, W.H., *Global and regional estimates of violence against women: prevalence and health effects of intimate partner violence and non-partner sexual violence*. 2013, WHO: Geneva, Switzerland.
3. Mokdad, A.H., et al., *Global burden of diseases, injuries, and risk factors for young people's health during 1990–2013: a systematic analysis for the Global Burden of Disease Study 2013*. Lancet, 2016. **387**(10036): p. 2383-2401.
4. Devries, K.M., et al., *Intimate partner violence and incident depressive symptoms and suicide attempts: a systematic review of longitudinal studies*. PLoS Med, 2013. **10**(5): p. e1001439.
5. Devries, K.M., et al., *Intimate partner violence victimization and alcohol consumption in women: a systematic review and meta-analysis*. Addiction, 2014. **109**(3): p. 379-91.
6. Hindin, M.J., S. Kishor, and D.L. Ansan, *Intimate Partner Violence among Couples in 10 DHS Countries: Predictors and Health Outcomes*. DHS Analytical studies No. 18. 2008: Calverton, Maryland, USA: .
7. World Health Organization, W.H., *WHO multi-country study on women's health and domestic violence against women 2005*, WHO: Geneva, Switzerland.
8. Abramsky, T., et al., *Findings from the SASA! Study: a cluster randomized controlled trial to assess the impact of a community mobilization intervention to prevent violence against women and reduce HIV risk in Kampala, Uganda*. BMC Med, 2014. **12**: p. 122.
9. Kim, J.C., et al., *Understanding the impact of a microfinance-based intervention on women's empowerment and the reduction of intimate partner violence in South Africa*. Am J Public Health, 2007. **97**(10): p. 1794-802.
10. Wagman, J.A., et al., *Effectiveness of an integrated intimate partner violence and HIV prevention intervention in Rakai, Uganda: analysis of an intervention in an existing cluster randomised cohort*. The Lancet Global Health, 2015. **3**(1): p. e23-33.
11. Glymour, M.M., et al., *When is baseline adjustment useful in analyses of change? An example with education and cognitive change*. American Journal of Epidemiology, 2005. **162**(3): p. 267–278.
12. Higgins, J. and S.G. Thompson, *Quantifying heterogeneity in a meta-analysis*. Statistics in Medicine, 2002. **21**(11): p. 1539–1558.
13. Chuang, C.H., et al., *Longitudinal association of intimate partner violence and depressive symptoms*. Mental Health in Family Medicine, 2012. **9**(2): p. 107-114.
14. Gilbert, L., et al., *Substance use and partner violence among urban women seeking emergency care*. Psychology of Addictive Behaviors, 2012. **26**(2): p. 226-235.
15. Keiley, M.K., P.S. Keller, and M. El-Sheikh, *Effects of physical and verbal aggression, depression, and anxiety on drinking behavior of married partners: A prospective and retrospective longitudinal examination*. Aggressive Behavior, 2009. **35**(4): p. 296-312.
16. Nowotny, K.M. and J.L. Graves, *Substance use and intimate partner violence victimization among white, African American, and Latina women*. Journal of Interpersonal Violence, 2013. **28**(17): p. 3301-3318.
17. Leher, J.A., et al., *Depressive symptomatology as predictor of exposure to intimate partner violence among US female adolescents and young adults*. Archives of Pediatrics & Adolescent Medicine, 2006. **160**: p. 270-276.

18. Teitelman, A.M., et al., *Recent and past intimate partner abuse and HIV risk among young women*. Journal of Obstetric, Gynecologic, & Neonatal Nursing: Clinical Scholarship for the Care of Women, Childbearing Families, & Newborns, 2008. **37**(2): p. 219-227.
19. Zlotnick, C., D.M. Johnson, and R. Kohn, *Intimate Partner Violence and Long-Term Psychosocial Functioning in a National Sample of American Women*. Journal of Interpersonal Violence, 2006. **21**(2): p. 262-275.
20. El-Bassel, N., et al., *HIV and intimate partner violence among methadone-maintained women in New York City*. Social Science & Medicine, 2005. **61**(1): p. 171-183.
21. El-Bassel, N., et al., *Relationship between drug abuse and intimate partner violence: a longitudinal study among women receiving methadone*. American Journal of Public Health, 2005. **95**(3): p. 1493-1494.
22. Roberts, T.A. and J. Klein, *Intimate partner abuse and high-risk behavior in adolescents*. Archives of Pediatrics & Adolescent Medicine, 2003. **157**(4): p. 375-80.
23. Newcomb, M.D. and J. Vargas Carmona, *Adult Trauma and HIV Status Among Latinas: Effects Upon Psychological Adjustment and Substance Use*. AIDS and Behavior, 2004. **8**(4): p. 417-428.
24. Foshee, V.A., et al., *Longitudinal predictors of serious physical and sexual dating violence victimization during adolescence*. Prev Med, 2004. **39**(5): p. 1007-16.
25. Suglia, S.F., C.S. Duarte, and M.T. Sandel, *Housing quality, housing instability, and maternal mental health*. Journal of urban health : bulletin of the New York Academy of Medicine, 2011. **88**(6): p. 1105-1116.
26. Levendosky, A.A., et al., *The influence of domestic violence on the stability of attachment from infancy to preschool*. Journal of Child & Adolescent Psychology, 2011. **40**(3): p. 398-410.
27. Testa, M. and K.E. Leonard, *The impact of marital aggression on women's psychological and marital functioning in a newlywed sample*. Journal of Family Violence, 2001. **16**(2): p. 115-130.
28. Testa, M., J.A. Livingston, and K.E. Leonard, *Women's substance use and experiences of intimate partner violence: A longitudinal investigation among a community sample*. Addictive Behaviors, 2003. **28**(9): p. 1649-1664.
29. Marsh Buzy, W., *Adolescent girls' alcohol use as a risk factor for relationship violence*. Journal of Research on Adolescence, 2004. **14**(4): p. 449-470.
30. Davidson, S.K., C.F. Dowrick, and J.M. Gunn, *Impact of functional and structural social relationships on two year depression outcomes: a multivariate analysis*. Journal of Affective Disorders, 2016. **193**: p. 274-281.
31. Taft, A.J. and L.F. Watson, *Depression and termination of pregnancy (induced abortion) in a national cohort of young Australian women: the confounding effect of women's experience of violence*. BMC Public Health, 2008. **8**: p. 75.
32. Woolhouse, H., et al., *Maternal depression from early pregnancy to 4 years postpartum in a prospective pregnancy cohort study: implications for primary health care*. BJOG: An International Journal of Obstetrics & Gynaecology, 2014. **122**(3): p. 312-21.
33. Boden, J.M., D.M. Fergusson, and L. Horwood, *Alcohol misuse and relationship breakdown: Findings from a longitudinal birth cohort*. Drug and Alcohol Dependence, 2013. **133**(1): p. 115-120.
34. Gao, W., et al., *Impact of current and past intimate partner violence on maternal mental health and behaviour at 2 years after childbirth: Evidence from the Pacific Islands Families Study*. Australian and New Zealand Journal of Psychiatry, 2010. **44**(2): p. 174-182.

- 1
- 2
- 3 35. Jewkes, R.K., et al., *Intimate partner violence, relationship power inequity, and*
- 4 *incidence of HIV infection in young women in South Africa: A cohort study.* The
- 5 *Lancet*, 2010. **376**(9734): p. 41-48.
- 6 36. Nduna, M., et al., *Associations between depressive symptoms, sexual behaviour and*
- 7 *relationship characteristics: a prospective cohort study of young women and men in*
- 8 *the Eastern Cape, South Africa.* *Journal of the International AIDS Society*, 2010. **13**:
- 9 p. 44.
- 10 37. Tsai, A.C., et al., *Intimate partner violence and depression symptom severity among*
- 11 *South African women during pregnancy and postpartum: population-based*
- 12 *prospective cohort study.* *PLoS Medicine*, 2016. **13**(1): p. e1001943.
- 13 38. Chowdhary, N. and V. Patel, *The effect of spousal violence on women's health:*
- 14 *findings from the Stree Arogya Shodh in Goa, India.* *Journal of Postgraduate*
- 15 *Medicine*, 2008. **54**(4): p. 306-12.
- 16 39. Patel, V., M. Rodrigues, and N. DeSouza, *Gender, poverty and postnatal depression:*
- 17 *a study of mothers in Goa, India.* *American Journal of Psychiatry*, 2002. **159**(1): p.
- 18 43-46.
- 19 40. Algeria, M., et al., *Understanding hard-core drug use among urban Puerto Rican*
- 20 *women in high-risk neighborhoods.* *Addictive Behaviors*, 2004. **29**(643-664).
- 21 41. Escriba-Aguir, V., et al., *Longitudinal study of depression and health status in*
- 22 *pregnant women: Incidence, course and predictive factors.* *European Archives of*
- 23 *Psychiatry and Clinical Neuroscience*, 2013. **263**(2): p. 143-151.
- 24 42. Kim, J. and J. Lee, *Prospective study on the reciprocal relationship between intimate*
- 25 *partner violence and depression among women in Korea.* *Social Science & Medicine*,
- 26 2013. **99**: p. 42-48.
- 27 43. Salazar, M., et al., *Ending intimate partner violence after pregnancy: findings from a*
- 28 *community-based longitudinal study in Nicaragua.* *BMC Public Health*, 2009. **9**: p.
- 29 350.
- 30 44. Wilson, K.S., et al., *A prospective cohort study of intimate partner violence and*
- 31 *unprotected sex in HIV-positive female sex workers in Mombasa, Kenya.* *AIDS*
- 32 *Behavior*, 2016. **20**: p. 2054-2064.
- 33 45. Kita, S., et al., *Associations between intimate partner violence (IPV) during*
- 34 *pregnancy, mother-to-infant bonding failure, and postnatal depressive symptoms.*
- 35 *Archives of Women's Mental Health*, 2016. **19**: p. 623-634.
- 36 46. Flach, C., et al., *Antenatal domestic violence, maternal mental health and subsequent*
- 37 *child behaviour: a cohort study.* *BJOG: An International Journal of Obstetrics &*
- 38 *Gynaecology*, 2011. **118**(11): p. 1383-91.
- 39 47. Boden, J.M., D.M. Fergusson, and L. Horwood, *Alcohol misuse and violent behavior:*
- 40 *Findings from a 30-year longitudinal study.* *Drug and Alcohol Dependence*, 2012.
- 41 **122**(1-2): p. 135-141.
- 42 48. Teitelman, A.M., et al., *Recent and Past Intimate Partner Abuse and HIV Risk Among*
- 43 *Young Women.* *Obstet Gynecol Neonatal Nurs*, 2008. **37**(2): p. 219-227.
- 44 49. Stene, L.E., et al., *Intimate partner violence and cardiovascular risk in women: A*
- 45 *population-based cohort study.* *Journal of Women's Health*, 2013. **22**(3): p. 250-258.
- 46 50. Clark, C.J., et al., *Dating violence, childhood maltreatment, and BMI from*
- 47 *adolescence to young adulthood.* *Pediatrics*, 2014. **134**(4): p. 678-685.
- 48 51. Clark, C.J., et al., *Intimate partner violence in late adolescence and young adulthood*
- 49 *and subsequent cardiovascular risk in adulthood.* *Prev Med*, 2016. **87**: p. 132-137.
- 50 52. Clark, C.J., et al., *Effect of partner violence in adolescence and young adulthood on*
- 51 *blood pressure and incident hypertension.* *PLoS ONE [Electronic Resource]*, 2014.
- 52 **9**(3): p. e92204.
- 53
- 54
- 55
- 56
- 57
- 58
- 59
- 60

- 1  
2  
3  
4  
5  
6  
7  
8  
9  
10  
11  
12  
13  
14  
15  
16  
17  
18  
19  
20  
21  
22  
23  
24  
25  
26  
27  
28  
29  
30  
31  
32  
33  
34  
35  
36  
37  
38  
39  
40  
41  
42  
43  
44  
45  
46  
47  
48  
49  
50  
51  
52  
53  
54  
55  
56  
57  
58  
59  
60
53. Miller, A.H., *Neuroendocrine and immune system interactions in stress and depression*. Psychiatric Clinics of North America, 1998. **21**(2): p. 443-463.
  54. Howard, L.M., et al., *Domestic violence and perinatal mental disorders: a systematic review and meta-analysis*. PLoS Medicine / Public Library of Science, 2013. **10**(5): p. e1001452.
  55. Boden, J.M. and D.M. Fergusson, *Alcohol and depression*. Addiction, 2011. **106**(5): p. 906-14.
  56. Machisa, M.T., N. Christophides, and R. Jewkes, *Mental ill health in structural pathways to women's experiences of intimate partner violence*. PLOS One, 2017. **12**(4): p. 0175240.
  57. Foran, H.M. and K.D. O'Leary, *Alcohol and intimate partner violence: A meta-analytic review*. Clinical Psychology Review 28 2008. **28**(7): p. 1222–1234.
  58. Leonard, K.E. and R.D. Eiden, *Marital and family processes in the context of alcohol use and alcohol disorders*. Annual Review of Clinical Psychology, 2007. **3**: p. 285–310.
  59. Leadley, K., C. Clark, and C. R., *Couples' drinking patterns, intimate partner violence, and alcohol-related partnership problems*. Journal of Substance Abuse, 2000. **11**(3): p. 253–263.
  60. Barbosa, C., et al., *Modelling lifetime QALYs and health care costs from different drinking patterns over time: a Markov model*. International Journal of Methods in Psychiatric Research, 2010. **19**(2): p. 97-109.
  61. Room, R., T. Babor, and J. Rehm, *Alcohol and public health*. Lancet HIV, 2005. **365**(9458): p. 519-530.
  62. Campbell, J.C., *Health consequences of intimate partner violence*. . The Lancet, 2002. **359**(9314): p. 1331-1336.
  63. Johnson, M.P., *Patriarchal terrorism and common couple violence: two forms of violence against women*. . Journal of Marriage and Family, 1995. **57**(2): p. 283-294.
  64. Nyamayemombe, C., et al., *The association between violence against women and hiv: evidence from a national population-based survey in Zimbabwe*. 2010: Calverton (Maryland): ICF Macro.



1  
2  
3  
4  
5  
6  
7  
8  
9  
10  
11  
12  
13  
14  
15  
16  
17  
18  
19  
20  
21  
22  
23  
24  
25  
26  
27  
28  
29  
30  
31  
32  
33  
34  
35  
36  
37  
38  
39  
40  
41  
42  
43  
44  
45  
46  
47  
48  
49  
50  
51  
52  
53  
54  
55  
56  
57  
58  
59  
60

For peer review only

# BMJ Open

## Recent intimate partner violence against women and health: a systematic review and meta-analysis of cohort studies

|                                 |                                                                                                                                                                                                                                                                                                                                                                                                                     |
|---------------------------------|---------------------------------------------------------------------------------------------------------------------------------------------------------------------------------------------------------------------------------------------------------------------------------------------------------------------------------------------------------------------------------------------------------------------|
| Journal:                        | <i>BMJ Open</i>                                                                                                                                                                                                                                                                                                                                                                                                     |
| Manuscript ID                   | bmjopen-2017-019995.R1                                                                                                                                                                                                                                                                                                                                                                                              |
| Article Type:                   | Research                                                                                                                                                                                                                                                                                                                                                                                                            |
| Date Submitted by the Author:   | 08-Mar-2018                                                                                                                                                                                                                                                                                                                                                                                                         |
| Complete List of Authors:       | Bacchus, Loraine; London School of Hygiene and Tropical Medicine, Global Health and Development<br>Ranganathan, Meghna; London School of Hygiene and Tropical Medicine, Global Health and Development<br>Watts, Charlotte; London School of Hygiene & Tropical Medicine, Global Health and Development<br>Devries, Karen; London School of Hygiene & Tropical Medicine, Department of Global Health and Development |
| <b>Primary Subject Heading</b>: | Public health                                                                                                                                                                                                                                                                                                                                                                                                       |
| Secondary Subject Heading:      | Epidemiology, Mental health                                                                                                                                                                                                                                                                                                                                                                                         |
| Keywords:                       | Depression & mood disorders < PSYCHIATRY, Substance misuse < PSYCHIATRY, PUBLIC HEALTH, MENTAL HEALTH                                                                                                                                                                                                                                                                                                               |
|                                 |                                                                                                                                                                                                                                                                                                                                                                                                                     |

SCHOLARONE™  
Manuscripts

Only

1  
2  
3 **Recent intimate partner violence against women and health: a systematic review and**  
4  
5 **meta-analysis of cohort studies**  
6  
7

8  
9 Loraine J. Bacchus<sup>1</sup>, Meghna Ranganathan<sup>1</sup>, Charlotte Watts<sup>1</sup>, Karen Devries<sup>1</sup>  
10

11 <sup>1</sup>London School of Hygiene & Tropical Medicine  
12

13 Faculty of Public Health & Policy  
14

15 Department of Global Health and Development  
16

17 London, UK  
18  
19  
20  
21

22 **Corresponding author**  
23

24 Dr Loraine J. Bacchus  
25

26 London School of Hygiene & Tropical Medicine  
27

28 15-17 Tavistock Place  
29

30 London WC1H 9SH  
31

32 E: [Lorraine.Bacchus@lshtm.ac.uk](mailto:Lorraine.Bacchus@lshtm.ac.uk)  
33

34 T: +44 (0)20 7958 8244  
35  
36  
37  
38

39 Keywords: Domestic violence, depression, substance related disorders, alcohol related  
40 disorders  
41  
42

43 Word count: 6,944  
44  
45  
46  
47  
48  
49  
50  
51  
52  
53  
54  
55  
56  
57  
58  
59  
60

## Abstract

**Objectives:** We reviewed cohort studies to determine the magnitude and temporal direction of the association between recent intimate partner violence (IPV) and a range of adverse health outcomes or health risk behaviours.

**Design:** Systematic review and meta-analysis.

**Methods:** Medline, EMBASE and PsycINFO were searched from the first record to November 2016. Recent IPV was defined as occurring up to and including the last 12 months; all health outcomes were eligible for inclusion. Results were combined using random effects meta-analysis.

**Results:** 35 separate cohort studies were retrieved. Eight studies showed evidence of a positive association between recent IPV and subsequent depressive symptoms, with a pooled OR from five estimates of 1.76 (95% CI 1.26-2.44,  $I^2 = 37.5%$   $p=0.172$ ). Five studies demonstrated a positive, statistically significant relationship between depressive symptoms and subsequent IPV; pooled ORs from two studies was 1.72 (95% CI 1.28-2.31,  $I^2 = 0.0%$ ,  $p=0.752$ ). Recent IPV was also associated with increased symptoms of subsequent postpartum depression in five studies (OR=2.19, 95% CI 1.39-3.45  $p=0.000$ ) although there was substantial heterogeneity. There was some evidence of a bi-directional relationship between recent IPV and hard drug use, and marijuana use although studies were limited. There was no evidence of an association between recent IPV and alcohol use or sexually transmitted infections (STIs) although there were few studies and inconsistent measurement of alcohol and STIs.

## Conclusions

Exposure to violence has significant impacts. Longitudinal studies are needed to understand the temporal relationship between recent IPV and different health issues, whilst considering the differential effects of recent versus past exposure to IPV. Improved measurement will

1  
2  
3 enable an understanding of the immediate and longer-term health needs of women exposed to  
4  
5 IPV. Health care providers and IPV organisations should be aware of the bi-directional  
6  
7 relationship between recent IPV and depressive symptoms.  
8

9 Systematic review registered on Prospero (CRD42016033372).  
10  
11  
12

### 13 **Strengths**

- 15     ▪ This is the first systematic review of cohort studies to measure the magnitude of the  
16       association and temporal direction between recent exposure to IPV and health  
17       outcomes.  
18
- 19     ▪ As the review considers a broad range of outcomes, we identified gaps in the evidence  
20       base including a need for cohort studies on recent IPV and non-communicable  
21       diseases such as cardiovascular disease hypertension and obesity, as well as  
22       posttraumatic stress disorder and anxiety disorder.  
23  
24  
25  
26  
27  
28  
29

### 30 **Limitations**

- 31     ▪ Due to the large number of abstracts retrieved and the limited timeframe for the  
32       review, we were not able to employ double screening of abstracts. However, two  
33       researchers conducted the review of full text papers, with a third reviewer the full  
34       texts of papers where there was uncertainty about their inclusion.  
35  
36  
37  
38  
39  
40
- 41     ▪ As some studies measured the outcome variable (either IPV or the health condition)  
42       continuously, it was not possible to combine all measures of effect, which limited the  
43       number of studies in the meta-analyses.  
44  
45  
46  
47
- 48     ▪ It was not possible to quantitatively assess publication bias, as too few studies were in  
49       the meta-analyses of each health condition.  
50  
51  
52  
53  
54  
55  
56  
57  
58  
59  
60

## Background

Worldwide, almost a third (30%) of all women who have been in a relationship have experienced physical and/or sexual violence by their intimate partner.<sup>1 2</sup> Women's lifetime exposure to IPV is associated with myriad health outcomes. Systematic reviews of longitudinal data, find that women who have been physically and/or sexually abused by their partner at some point in their life are twice as likely to have an abortion, twice as likely to suffer from depression, and in some regions are 1.5 times more likely to acquire HIV compared to women who have not experienced IPV.<sup>2</sup> Not surprisingly, given its high prevalence and adverse health effects, lifetime exposure to IPV is estimated to result in a high burden of disease. IPV is the second most common risk factor for disability-adjusted life years (DALY) globally in women aged 20 to 24 years.<sup>3</sup>

In our previous systematic reviews, we began to explore the relationships between 'ever' exposure to IPV and depressive symptoms and alcohol use, which revealed evidence of a bidirectional association. Devries et al. found evidence suggestive of an association between IPV and incident depressive symptoms (OR=1.97, 95% CI 1.56-2.48) as well as an association in the reverse direction between depressive symptoms and incident IPV (OR=1.93, 95% CI 1.51-2.48).<sup>4</sup> In another systematic review the authors found increased odds of alcohol use following IPV (OR=1.25, 95% CI 1.02-1.52) and increased odds of IPV following alcohol use (OR=1.27, 95% CI 1.07-1.52).<sup>5</sup>

Although available evidence finds important associations between IPV and a range of mental and physical health outcomes, the nature of the associations are not always clear. It is possible that exposure to IPV results in subsequent mental and physical health outcomes; that

1  
2  
3 different mental and physical health conditions increase risk of subsequent IPV; or that a bi-  
4  
5 directional relationship is present.  
6  
7

8  
9 Both IPV and some associated health outcomes, such as depression, anxiety and substance  
10  
11 abuse, are chronic, episodic conditions, which can occur with varying frequency over longer  
12  
13 time periods. Studies that measure lifetime exposure to IPV therefore hide the complexity of  
14  
15 the relationship between IPV and mental and physical health outcomes. This is because  
16  
17 estimates of 'ever' exposure to IPV are heterogeneous, and may include anything from past  
18  
19 year, before the past year and more distant experiences of IPV. Recent violence may lead to  
20  
21 more severe health outcomes, but this may be influenced by duration and severity, for  
22  
23 example, recent violence with no prior history versus recent violence experienced as part of  
24  
25 ongoing historical abuse.  
26  
27

28  
29  
30  
31 In the current systematic review, we build on this by closely examining the issue of  
32  
33 temporality with regard to recent exposure to IPV and a broader range of health outcomes. In  
34  
35 this paper we aim to: (i) review what health outcomes have been examined in cohort studies  
36  
37 of recent IPV ('recent' defined here as IPV experienced up to and including the last 12  
38  
39 months); (ii) quantify the magnitude of the association between IPV and different health  
40  
41 outcomes and (iii) examine the temporal direction of IPV and health outcomes.  
42  
43  
44  
45

## 46 **Methods**

47  
48 A systematic review protocol was registered on PROSPERO on the 18<sup>th</sup> March 2016  
49  
50 (CRD42016033372) and is available from  
51  
52 [http://www.crd.york.ac.uk/PROSPERO/display\\_record.php?ID=CRD42016033372](http://www.crd.york.ac.uk/PROSPERO/display_record.php?ID=CRD42016033372)  
53  
54  
55  
56  
57  
58  
59  
60

### ***Literature searches***

We searched Medline, EMBASE and PsycINFO from the first record up to January 27, 2016 (with an updated search conducted in November 2016). Terms for IPV were adapted from a previous systematic review on the prevalence of IPV and health outcomes which was conducted for the 2010 Global Burden of Disease of IPV.<sup>1</sup> Controlled vocabulary terms and text words related to longitudinal studies were used for each database. In order to ensure a wide yield of studies, terms for specific health outcomes were not included. An example search strategy appears in Appendix 1. Reference list screening was undertaken for key systematic review papers. One study was included from a systematic review on IPV and perinatal mental health disorders published in 2017 which we identified whilst this paper was under review.

### ***Inclusion criteria***

- English language publications
- Longitudinal studies reporting on female participants aged 15 and over were considered. Studies were deemed longitudinal if either the exposure or the outcome was measured on at least two occasions.
- Studies where IPV was conceptualised as the independent variable, or where IPV was the dependent variable, in order to capture any evidence of bi-directional causality.
- All author definitions of recent IPV victimisation that occurred up to and including 12 months prior.
- All author definitions of women related health outcomes that were measured on at least two occasions.



1  
2  
3 A 12-month cut-off period was chosen for recent IPV as this is the most commonly used  
4 period for prevalence estimates, it is consistent with internationally recognised IPV  
5 measures,<sup>6,7</sup> and has been used in a number of intervention studies for IPV.<sup>8-10</sup>  
6  
7  
8  
9

### 10 11 ***Screening and data extraction*** 12

13 Records were initially screened by one reviewer (LJB) and studies not meeting the inclusion  
14 criteria were removed. Full text articles were reviewed by one reviewer (LJB) and where  
15 there was uncertainty about the inclusion of an article it was referred to the senior author  
16 (KD). The final set of full-text articles were formally appraised by two reviewers (LJB and  
17 MR). Data were extracted and entered into an Excel spreadsheet by one reviewer (LJB). The  
18 study selection process including the number of studies abstracts and full texts screened with  
19 reasons for exclusion is summarised in the flowchart in Figure 1.  
20  
21  
22  
23  
24  
25  
26  
27  
28  
29  
30

### 31 ***Quality appraisal*** 32

33 The quality of each effect estimate was appraised and presented in Table 1 which correspond  
34 to the major relevant domains of potential bias in quality assessment tools. Consideration was  
35 given to whether definitions of IPV and health outcomes were based on valid, reliable  
36 measures. We considered whether studies controlled for potential confounders for two  
37 reasons. IPV and the health outcomes of interest commonly occur episodically over a period  
38 of time, and episodes of either that are incident over the study period may be a continuation  
39 of previous IPV or health outcomes. Therefore, we examined whether studies adjusted for  
40 time one levels (i.e. at the beginning of the study period) of the outcome variable.  
41  
42  
43  
44  
45  
46  
47  
48  
49

50 Additionally, IPV and the health outcomes of interest are associated with demographic  
51 characteristics and other risk factors that may explain the association between them such as  
52 childhood sexual abuse. Due to the complexity of the potential causal pathways between IPV  
53  
54  
55  
56  
57  
58  
59  
60

1  
2  
3 and the health outcomes, we did not specify a minimum set of confounders that should be  
4 adjusted for. Additionally, it has been noted that it is not always appropriate to adjust for  
5 baseline levels of an outcome variable in longitudinal studies. When exposures are associated  
6 with baseline health status, bias can arise if change in health status preceded baseline  
7 assessment or if the dependent variable measurement is unreliable or unstable.<sup>11</sup> However,  
8 we recorded whether key variables were adjusted for and examined the results in the light of  
9 these adjustments. Information was also extracted in relation to mode of administration of  
10 surveys, length of follow-up number of waves and attrition rates.  
11  
12  
13  
14  
15  
16  
17  
18  
19  
20  
21

### 22 ***Data Analysis***

23  
24 Analyses were conducted by LJB and KD using Stata 14.0. Study characteristics and quality  
25 are summarised descriptively. Studies reported a range of effect estimates (e.g. odds ratios,  
26 relative risks and correlation coefficients). Adjusted odds ratios (ORs) were extracted directly  
27 from the publications with the exception of one unadjusted OR which was calculated for a  
28 study on perceived stress which is not one of the health outcomes included in the meta-  
29 analyses. Studies measured IPV or health outcomes in heterogeneous ways, therefore the  
30 results are summarised descriptively for each health outcome. Where there were at least two  
31 estimates, random effects meta-analysis was used to calculate the pooled ORs representing  
32 associations between IPV occurring up to and including the last 12 months and various health  
33 outcomes. Higgin's  $I^2$  statistic, which describes the percentage of variability in point  
34 estimates that is due to heterogeneity rather than sampling error<sup>12</sup>, was calculated. Some  
35 studies reported multiple estimates using overlapping definitions of IPV on the same sample  
36 of participants. In order to avoid double counting participants in these studies, which can lead  
37 to falsely precise pooled estimates, preference was given to one estimate using the following  
38 algorithm implemented in the following sequence: (i) those derived from multivariate  
39  
40  
41  
42  
43  
44  
45  
46  
47  
48  
49  
50  
51  
52  
53  
54  
55  
56  
57  
58  
59  
60

1  
2  
3 analysis (ii) where the definition of IPV closely matched that of the other studies in the meta-  
4  
5 analysis (iii) where the reference group was unexposed to any violence and (iv) where the  
6  
7 estimate was most precise (i.e. the smallest confidence interval). This algorithm was applied  
8  
9 to 3 studies. Studies that provided multiple estimates, but on different sub-samples of  
10  
11 participants were included in the meta-analysis. Studies that reported other types of estimate  
12  
13 (e.g. correlations coefficients, betas, risk ratios) are documented separately.  
14  
15

### 16 17 18 ***Ethics Statement***

19  
20 All data used in this review were already in the public domain and ethical approval was not  
21  
22 required.  
23  
24

### 25 26 27 ***Patient and public involvement***

28  
29 Patients and the public were not involved in this systematic review.  
30  
31  
32  
33  
34  
35  
36  
37  
38  
39  
40  
41  
42  
43  
44  
45  
46  
47  
48  
49  
50  
51  
52  
53  
54  
55  
56  
57  
58  
59  
60

**Table 1. Quality assessment of 36 papers reporting on 35 studies included in the review and effect estimates**

1  
2  
3  
4  
5  
6  
7  
8  
9  
10  
11  
12  
13  
14  
15  
16  
17  
18  
19  
20  
21  
22  
23  
24  
25  
26  
27  
28  
29  
30  
31  
32  
33  
34  
35  
36  
37  
38  
39  
40  
41  
42  
43  
44  
45  
46  
47

| Study, Participants, Country                     | Length of Follow-up; Number of Waves | Attrition at Last Wave | IPV Measure and Timeframe                                              | Health Outcome Measure and Timeframe             | Adjusted for Time 1 Dependent Variable <sup>a</sup>              | Adjusted for CSA | Other Variables Adjusted For                                                                                                                                                                                                                | Mode of Administration                         | Effect Estimate               |
|--------------------------------------------------|--------------------------------------|------------------------|------------------------------------------------------------------------|--------------------------------------------------|------------------------------------------------------------------|------------------|---------------------------------------------------------------------------------------------------------------------------------------------------------------------------------------------------------------------------------------------|------------------------------------------------|-------------------------------|
| <b>Depressive symptoms as dependent variable</b> |                                      |                        |                                                                        |                                                  |                                                                  |                  |                                                                                                                                                                                                                                             |                                                |                               |
| Chuang et al. [13]; 1,420 adult women; USA       | 2 years; 2 waves                     | 29.1%                  | Physical and/or sexual, CTS-like, last 12 months                       | Depression, CES-D, past week                     | Yes                                                              | No               | IPV; age group; race; education; marital status; income (for the step 1 regression model)                                                                                                                                                   | Telephone interview                            | aOR=1.88 (1.02-3.45)          |
| Chowdhary & Patel [39]; 1,750 adult women; India | 1 year; 3 waves                      | -                      | Physical, CT-like, last 3 months                                       | Depressive disorder, ICD-10, currently suffering | No, but analysis removes women with baseline depressive disorder | No               | Age; literacy; household per capita income                                                                                                                                                                                                  | Interviewer administered                       | aOR=0.5 (0.07-3.79)           |
| Davidson et al. [31]; 494 adult women; Australia | 2 years; 2 waves                     | 37.4%                  | Physical and/or sexual, CAS, last 12 months                            | Major Depressive Disorder, PHQ-9, past 2 weeks   | Yes                                                              | Yes              | Social function; social structure; lives alone; economic disadvantage; neuroticism; child sexual abuse; child physical abuse                                                                                                                | Self-administered                              | aOR=2.3 (1.03-5.12), p=0.04   |
| Kim & Lee [43]; 153 adult women; Korea           | 4 years; 4 waves                     | 34.2%                  | “Physical violence and/or threat of physical violence”, last 12 months | Depression, CES-D, past week                     | Yes                                                              | No               | Age; education; social support; household income; past year physical violence at time 1                                                                                                                                                     | Interviewer administered                       | Beta=-0.03, SE=0.01, p=0.004  |
| Newcomb et al. [23] 113 adult women; USA         | 1 year; 3 waves                      | 24.0%                  | Psychological and/or physical, CTS, last 6 months                      | Depression, CES-D, period not specified          | Yes                                                              | No               | Age; education; relationship status                                                                                                                                                                                                         | Interviewer administered                       | Path coefficient=0.17, p<0.05 |
| Suglia et al. [25]; 1,834 adult women; USA       | 3 years; 3 waves                     | -                      | Physical and/or sexual, CTS-like, last 12 months                       | Depression, CID1-SF, past 12 months              | Yes                                                              | No               | Age; ethnicity; education; marital status; economic hardship; IPV                                                                                                                                                                           | Interviewer administered                       | aOR=1.09 (0.6-1.9)            |
| Roberts et al. [22]; 2,206 adolescents; USA      | 1 year; 2 waves                      | -                      | Physical, CTS, last 12 months                                          | Depression, CES-D, past week                     | Yes                                                              | No               | Sociodemographic factors; highest level of abuse by a partner prior to wave 1; number of sexual partners between wave 1 and 2; time elapsed between wave 1 and wave 2; level of risk behaviour at wave 1 (alcohol use/illicit substance us) | Computer assisted personal and self- interview | Beta=0.18 (0.1-0.26) p<0.05   |

1  
2  
3  
4

| Study, Participants, Country                              | Length of Follow-up; Number of Waves | Attrition at Last Wave | IPV Measure and Timeframe                                              | Health Outcome Measure and Timeframe                  | Adjusted for Time 1 Dependent Variable <sup>a</sup> | Adjusted for CSA | Other Variables Adjusted For                                                                                                                                                                                    | Mode of administration                         | Effect Estimate             |
|-----------------------------------------------------------|--------------------------------------|------------------------|------------------------------------------------------------------------|-------------------------------------------------------|-----------------------------------------------------|------------------|-----------------------------------------------------------------------------------------------------------------------------------------------------------------------------------------------------------------|------------------------------------------------|-----------------------------|
| Taft et al. [32]; 99,683 adult women; Australia           | 4 years; 2 waves                     | -                      | Physical and/or sexual, CTS, last 12 months                            | Depression, CES-D, past week                          | Yes                                                 | No               | Depression time 1; number of children; marital status; age; education level; occupation; health insurance status; country of birth; area of residence; state of residence; Aboriginal or Torres Strait identity | Self-administered                              | aOR=2.12 (1.69-2.65)        |
| Zlotnick et al. [19] 3,104 adult women; USA               | 5 years; 2 waves                     | -                      | Physical, CTS-like, last 12 months                                     | Depression, CES-D, past week                          | Yes                                                 | No               | Age                                                                                                                                                                                                             | Self-administered and interviewer administered | Beta=6.96, p=0.003          |
| <b>Depressive symptoms – IPV as dependent variable</b>    |                                      |                        |                                                                        |                                                       |                                                     |                  |                                                                                                                                                                                                                 |                                                |                             |
| Goshee et al. 2004 [24]; 1,291 adolescents; USA           | 4-5 years; 4-5 waves                 | -                      | Sexual dating violence, CTS like, last 12 months                       | Depression symptoms “Kandel and Davis”, last 6 months | Yes                                                 | No               | Demographics; peer environment; family environment; social norms; personal competencies; depression; problem behaviour; alcohol use                                                                             | Self-administered                              | HR=1.35 (1.05-1.74)         |
| Kim & Lee [43]; 3,153 adult women; Korea                  | 4 years; 4 waves                     | 34.2%                  | “Physical violence and/or threat of physical violence”, last 12 months | Depression, CES-D, past week                          | Yes                                                 | No               | Age; education; social support; household income                                                                                                                                                                | Interviewer administered                       | Beta=3.34, SE=0.61, p<0.001 |
| Geher et al. 2006 [17]; 1,659 adolescents; USA            | 7 years; 3 waves                     | -                      | Physical, CTS-like, last 12 months                                     | Depression, CES-D, past week                          | Yes                                                 | Yes              | Age; race/ethnicity; parental education; childhood physical abuse; dating violence/forced sex                                                                                                                   | Computer assisted self- interview              | aOR=1.86 (1.05-3.29)        |
| Levendosky et al. [26] 150 adult women; USA               | 4 years; 5 waves                     | -                      | Physical and/or sexual, last 12 months, SVAWS                          | Depression, BDI, time period not specified            | No                                                  | No               | Unadjusted                                                                                                                                                                                                      | Interviewer administered                       | R=0.24, p<0.05              |
| Mduna et al. 2010 [37]; 995 women and girls; South Africa | 1 year; 2 waves                      | 22.6%                  | Physical and/or sexual, CTS-like (WHO), last 12 months                 | Depression, CES-D, past week                          | Yes                                                 | Yes              | Socio-economic status; experiences of childhood adversity; alcohol abuse; education; study design                                                                                                               | Interviewer administered                       | aOR=1.67 (1.18-2.36)        |

37  
38  
39  
40  
41  
42  
43  
44  
45  
46  
47

1  
2  
3  
4

| Study, Participants, Country                            | Length of Follow-up; Number of Waves | Attrition at Last Wave | IPV Measure and Timeframe                                                     | Health Outcome Measure and Timeframe                                  | Adjusted for Time 1 Dependent Variable <sup>a</sup> | Adjusted for CSA | Other Variables Adjusted For                                                                                                                                                                      | Mode of administration                                              | Effect Estimate                                                                                                                                                      |
|---------------------------------------------------------|--------------------------------------|------------------------|-------------------------------------------------------------------------------|-----------------------------------------------------------------------|-----------------------------------------------------|------------------|---------------------------------------------------------------------------------------------------------------------------------------------------------------------------------------------------|---------------------------------------------------------------------|----------------------------------------------------------------------------------------------------------------------------------------------------------------------|
| <b>Postpartum depression as dependent variable</b>      |                                      |                        |                                                                               |                                                                       |                                                     |                  |                                                                                                                                                                                                   |                                                                     |                                                                                                                                                                      |
| Escriba-Aguir et al. [42]; 888 pregnant women; Spain    | 1 year; 4 waves                      | 33.5%                  | Psychological, Abuse AAS, past 12 months                                      | Postpartum depression, EPDS, past 12 months                           | Yes                                                 | No               | Sociodemographic factors (age, marital status, education, employment status, native country); negative life events                                                                                | Self-administered, interviewer administered and telephone interview | aOR=4.11 (1.23-13.73)                                                                                                                                                |
| Flach et al. [47]; 5,681 pregnant women; United Kingdom | 3.5 years; 5 waves                   | -                      | Has a partner physically hurt and/or been emotionally cruel, during pregnancy | Postnatal depression, EPDS, past 7 days (asked at 8 weeks postpartum) | Yes                                                 | No               | Paternal postnatal depressive symptoms; size of child for gestational age                                                                                                                         | Self-administered                                                   | aOR=1.29 (1.02-1.63)                                                                                                                                                 |
| Kita et al. [46]; 962 adult women; Japan                | 1 month; 2 waves                     | 26.7%                  | Physical and/or non-physical, during pregnancy, ISA                           | Postnatal depression, HADS, past 7 days                               | Yes                                                 | No               | Mother to infant bonding; age, parity                                                                                                                                                             | Self-administered                                                   | Path coefficients: Antenatal IPV and postnatal depression=0.10 (NS); Antenatal IPV and antenatal depression=0.31; Antenatal depression and postnatal depression=0.57 |
| Patel et al. [40]; 235 pregnant women; India            | 6 months; 3 waves                    | 13.0%                  | "Marital violence" during pregnancy                                           | Postnatal depression at 6 months, EPDS, past 7 days                   | No                                                  | No               | Unadjusted                                                                                                                                                                                        | Interviewer administered                                            | RR=2.6 (1.6-4.3) p=0.001                                                                                                                                             |
| Tsai et al. [38]; 258 pregnant women; South Africa      | 3 years; 4 waves                     | 22.6%                  | Physical, CTS, last 12 months                                                 | Postpartum Depression, EPDS, past 7 days                              | Yes                                                 | No               | Intervention or control arm; age; completion of high school; household wealth; employment full time or part time; whether father or baby is with participant; HIV serostatus; high blood pressure | Interviewer administered                                            | Coefficient=1.04 (0.61-1.47)                                                                                                                                         |

38  
39  
40  
41  
42  
43  
44  
45  
46  
47



1  
2  
3  
4

| Study, Participants, Country                             | Length of Follow-up; Number of Waves | Attrition at Last Wave | IPV Measure and Timeframe                                                              | Health Outcome Measure and Timeframe                                 | Adjusted for Time 1 Dependent Variable <sup>a</sup> | Adjusted for CSA | Other Variables Adjusted For                                                                                                                                                                                                                | Mode of administration                                                                    | Effect Estimate                             |
|----------------------------------------------------------|--------------------------------------|------------------------|----------------------------------------------------------------------------------------|----------------------------------------------------------------------|-----------------------------------------------------|------------------|---------------------------------------------------------------------------------------------------------------------------------------------------------------------------------------------------------------------------------------------|-------------------------------------------------------------------------------------------|---------------------------------------------|
| <b>Postpartum depression – IPV as dependent variable</b> |                                      |                        |                                                                                        |                                                                      |                                                     |                  |                                                                                                                                                                                                                                             |                                                                                           |                                             |
| Tsai et al. [38]; 658 pregnant women; South Africa       | 3 years; 4 waves                     | 22.6%                  | Physical, CTS, last 12 months                                                          | Postpartum Depression, EPDS, past 7 days                             | Yes                                                 | No               | Intervention or control arm; age at baseline; completion of high school; household wealth; employment full time or part time; whether father or baby is with participant; HIV serostatus; high blood pressure                               | Interviewer administered                                                                  | Beta=0.054 (0.030-0.079)                    |
| <b>Suicide attempts as dependent variable</b>            |                                      |                        |                                                                                        |                                                                      |                                                     |                  |                                                                                                                                                                                                                                             |                                                                                           |                                             |
| Chowdhary & Patel [39]; 8,750 adult women; India         | 1 year; 3 waves                      | -                      | Verbal, CTS-like, last 3 months                                                        | Single question, ever attempted suicide                              | Yes                                                 | No               | Age; literacy; household per capita income                                                                                                                                                                                                  | Interviewer administered                                                                  | aOR=2.84 (0.55-14.73)                       |
| Roberts et al. [22]; 2,206 adolescents; USA              | 1 year; 2 waves                      | -                      | Verbal, threats, physical, CTS, last 12 months                                         | Single question, ever attempted suicide                              | Yes                                                 | No               | Sociodemographic factors; highest level of abuse by a partner prior to wave 1; number of sexual partners between wave 1 and 2; time elapsed between wave 1 and wave 2; level of risk behaviour at wave 1 (alcohol use/illicit substance us) | Computer assisted self- interview                                                         | Beta=0.12 (0.02-0.22)                       |
| <b>Perceived stress as dependent variable</b>            |                                      |                        |                                                                                        |                                                                      |                                                     |                  |                                                                                                                                                                                                                                             |                                                                                           |                                             |
| Salzaar et al. [44]; 398 adults; Nicaragua               | 3 years; 2 waves                     | 16.7%                  | Emotional, physical, sexual, WHO Survey, last 12 months                                | Perceived emotional distress, SRQ,                                   | No                                                  | No               | None                                                                                                                                                                                                                                        | Interviewer administered                                                                  | OR=4.59 (2.5-8.45) calculated               |
| Testa et al. 2001 [27]; 494 adult women; USA             | 2 years; 2 waves                     | 9.0%                   | Verbal aggression, CTS, last 12 months<br><br>Physical aggression, CTS, last 12 months | Perceived Stress, Cohen et al. 1983 a 14-item measure, past 6 months | Yes                                                 | No               | Race; have a child/pregnant; time 1 marital satisfaction; time 1 verbal aggression                                                                                                                                                          | Self-administered at time 1 and interviewer administered or telephone interview at time 2 | Beta=0.18; p<0.001<br><br>Beta=0.11; p<0.05 |
| Study, Participants, Country                             | Length of Follow-up;                 | Attrition at Last Wave | IPV Measure and Timeframe                                                              | Health Outcome                                                       | Adjusted for Time 1                                 | Adjusted for CSA | Other Variables Adjusted For                                                                                                                                                                                                                | Mode of administration                                                                    | Effect Estimate                             |

40  
41  
42  
43  
44  
45  
46  
47



1  
2  
3  
4

| Country                                                                   | Number of Waves  |       |                                                    | Measure and Timeframe                                                                                     | Dependent Variable <sup>a</sup> |     |                                                                                                                                   |                                                                     |                       |  |
|---------------------------------------------------------------------------|------------------|-------|----------------------------------------------------|-----------------------------------------------------------------------------------------------------------|---------------------------------|-----|-----------------------------------------------------------------------------------------------------------------------------------|---------------------------------------------------------------------|-----------------------|--|
| <b>General anxiety as dependent variable</b>                              |                  |       |                                                    |                                                                                                           |                                 |     |                                                                                                                                   |                                                                     |                       |  |
| Suglia et al. [25]; 1,834 adult women; USA                                | 3 years; 3 waves | -     | Physical and/or sexual, CTS-like, past 12 months   | Single question, asking if they had a period of 6 months or more when they felt worried, tense or anxious | Yes                             | No  | Age; ethnicity; education; marital status; economic hardship; IPV                                                                 | Interviewer administered                                            | aOR=1.95 (1-3.8)      |  |
| <b>Self-perceived health status as dependent variable</b>                 |                  |       |                                                    |                                                                                                           |                                 |     |                                                                                                                                   |                                                                     |                       |  |
| Escriba-Aguir et al. [42]; 888 pregnant women; Spain                      | 1 year; 4 waves  | 33.5% | Psychological, Abuse AAS, past 12 months           | Respondents asked to report their general health as: very good; good; fair; poor; very poor               | Yes                             | No  | Sociodemographic factors (age, marital status, education, employment status, native country); negative life events                | Self-administered, interviewer administered and telephone interview | aOR=4.32 (1.58-11.87) |  |
| <b>Hard drug use (cocaine, crack, heroin) as dependent variable</b>       |                  |       |                                                    |                                                                                                           |                                 |     |                                                                                                                                   |                                                                     |                       |  |
| Algeria et al. [41]; 452 adult women; Puerto Rico                         | 3 years; 3 waves | -     | Physical and/or psychological, CTS, last 12 months | Hard core drug use, self-report of crack or cocaine, heroin, past 12 months                               | Yes                             | No  | Education; employment; very severe partner violence; alcohol use in last year                                                     | Computer assisted personal interview                                | aOR=2.02 (1.04-3.91)  |  |
| El-Bassel et al. [21]; 317 adult women; USA                               | 1 year; 3 waves  | 24.0% | Physical and/or sexual, CTS, last 6 months         | “Drug Use and Risk Behaviour Questionnaire”, Cocaine use once a week or more, last 6 months               | No                              | Yes | Socio-demographics; history of trauma (childhood sexual abuse, PTSD); psychological distress; social support; HIV risk behaviours | Interviewer administered                                            | aOR=2.10 (0.82-5.5)   |  |
| <b>Hard drug use (cocaine, crack, heroin) – IPV as dependent variable</b> |                  |       |                                                    |                                                                                                           |                                 |     |                                                                                                                                   |                                                                     |                       |  |
| El-Bassel et al. [21]; 317 adult women; USA                               | 1 year; 3 waves  | 24.0% | Physical and/or sexual, CTS, last 6 months         | “Drug Use and Risk Behaviour Questionnaire”, Crack use once a week or more, last 6 months                 | No                              | Yes | Socio-demographics; history of trauma (childhood sexual abuse, PTSD); psychological distress; social support; HIV risk behaviours | Interviewer administered                                            | aOR=1.6 (0.84-3.0)    |  |

36  
37  
38  
39  
40  
41  
42  
43  
44  
45  
46  
47

1  
2  
3  
4

| Study, Participants, Country                | Length of Follow-up; Number of Waves | Attrition at Last Wave | IPV Measure and Timeframe                                                                                           | Health Outcome Measure and Timeframe                                                                 | Adjusted for Time 1 Dependent Variable <sup>a</sup> | Adjusted for CSA | Other Variables Adjusted For                                                                                                                                                                                                                                                                                  | Mode of administration                                                | Effect Estimate                                  |
|---------------------------------------------|--------------------------------------|------------------------|---------------------------------------------------------------------------------------------------------------------|------------------------------------------------------------------------------------------------------|-----------------------------------------------------|------------------|---------------------------------------------------------------------------------------------------------------------------------------------------------------------------------------------------------------------------------------------------------------------------------------------------------------|-----------------------------------------------------------------------|--------------------------------------------------|
| Gilbert et al. [14]; 185 adult women; USA   | 1 year; 3 waves                      | 23.2%                  | Physical, injurious, sexual, CTS, last 6 months                                                                     | “Drug Use and Risk Behaviour Questionnaire”, Hard drug use (cocaine, crack or heroin), last 6 months | Yes                                                 | Yes              | Socio-demographics (age, ethnicity, employment, marital status); homelessness; incarceration; childhood sexual abuse, psychological distress; active or avoidant coping; partner illicit drug use; partner binge drinking; financial dependency; sexual relationship power scale; perceived community support | Interviewer administered                                              | RR=1.6 (1.08-2.36)                               |
| Testa et al. [28] 724 adult women; USA      | 1 year; 2 waves                      | -                      | Minor violence from same partner, CTS, last 12 months<br><br>Severe violence from same partner, CTS, last 12 months | Hard drug use, past year                                                                             | Yes                                                 | No               | Race; age; cohabiting; married; time 1 psychological aggression; marijuana use                                                                                                                                                                                                                                | Computer assisted self-interview, and self-administered postal survey | aOR=2.41 (1.36-4.26)<br><br>aOR=2.87 (1.39-5.92) |
| <b>Marijuana use as dependent variable</b>  |                                      |                        |                                                                                                                     |                                                                                                      |                                                     |                  |                                                                                                                                                                                                                                                                                                               |                                                                       |                                                  |
| El-Bassel et al. [21]; 317 adult women; USA | 1 year; 3 waves                      | 24.0%                  | Physical and/or sexual, CTS, last 6 months                                                                          | “Drug Use and Risk Behaviour Questionnaire”, Marijuana use once a week or more, last 6 months        | No                                                  | Yes              | Socio-demographics; history of trauma (childhood sexual abuse, PTSD); psychological distress; social support; HIV risk behaviours                                                                                                                                                                             | Interviewer administered                                              | aOR=2.4 (0.92-6.2)                               |

33  
34  
35  
36  
37  
38  
39  
40  
41  
42  
43  
44  
45  
46  
47

1  
2  
3  
4

| Study, Participants, Country                                            | Length of Follow-up; Number of Waves | Attrition at Last Wave | IPV Measure and Timeframe                       | Health Outcome Measure and Timeframe                                                                 | Adjusted for Time 1 Dependent Variable <sup>a</sup> | Adjusted for CSA | Other Variables Adjusted For                                                                                                                                                                                                                                                                                                | Mode of administration                        | Effect Estimate     |
|-------------------------------------------------------------------------|--------------------------------------|------------------------|-------------------------------------------------|------------------------------------------------------------------------------------------------------|-----------------------------------------------------|------------------|-----------------------------------------------------------------------------------------------------------------------------------------------------------------------------------------------------------------------------------------------------------------------------------------------------------------------------|-----------------------------------------------|---------------------|
| 8 Gilbert et al.<br>9 [14]; 185 adult<br>10 women; USA                  | 1 year; 3 waves                      | 23.2%                  | Physical, CTS, last 6 months                    | "Drug Use and Risk Behaviour Questionnaire", Marijuana use, last 6 months                            | Yes                                                 | Yes              | Socio-demographics (age, ethnicity, employment, marital status); homelessness; incarceration; childhood sexual abuse, psychological distress; active or avoidant coping; partner illicit drug use; partner binge drinking; financial dependency; sexual relationship power scale; perceived community support; baseline IPV | Interviewer administered                      | RR=1.14 (0.81-1.6)  |
| 19 Nowotny &<br>20 Graves [16]<br>21 2,959<br>22 adolescents;<br>23 USA | 6 years; 2 waves                     | -                      | Sexual, CTS-like, last 12 months                | Marijuana use (any), last 12 months                                                                  | Yes                                                 | No               | Age; married; education; employment; personal income                                                                                                                                                                                                                                                                        | Computer assisted personal and self-interview | aOR=1.4 (0.97-2.08) |
| <b>23 Marijuana use – IPV as dependent variable</b>                     |                                      |                        |                                                 |                                                                                                      |                                                     |                  |                                                                                                                                                                                                                                                                                                                             |                                               |                     |
| 24 El-Bassel et al.<br>25 [22]; 317 adult<br>26 women; USA              | 1 year; 3 waves                      | 24.0%                  | Physical and/or sexual, CTS, last 6 months      | "Drug Use and Risk Behaviour Questionnaire", Marijuana use once a week or more, last 6 months        | No                                                  | No               | Socio-demographics; history of trauma (childhood sexual abuse, PTSD); psychological distress; social support; HIV risk behaviours                                                                                                                                                                                           | Interviewer administered                      | aOR=4.5 (2.4-8.4)   |
| 30 Gilbert et al.<br>31 [14]; 185 adult<br>32 women; USA                | 1 year; 3 waves                      |                        | Physical, injurious, sexual, CTS, last 6 months | "Drug Use and Risk Behaviour Questionnaire", Hard drug use (cocaine, crack or heroin), last 6 months | Yes                                                 | Yes              | Socio-demographics (age, ethnicity, employment, marital status); homelessness; incarceration; childhood sexual abuse, psychological distress; active or avoidant coping; partner illicit drug use; partner binge drinking; financial dependency; sexual relationship power scale; perceived community support               | Interviewer administered                      | RR=0.94 (0.71-1.24) |

40  
41  
42  
43  
44  
45  
46  
47

1  
2  
3  
4

| Study, Participants, Country                                                           | Length of Follow-up; Number of Waves | Attrition at Last Wave | IPV Measure and Timeframe                                                                                           | Health Outcome Measure and Timeframe                                                                                         | Adjusted for Time 1 Dependent Variable <sup>a</sup> | Adjusted for CSA | Other Variables Adjusted For                                                                                                                                                                                                                                                                                                | Mode of administration                                                | Effect Estimate                                  |
|----------------------------------------------------------------------------------------|--------------------------------------|------------------------|---------------------------------------------------------------------------------------------------------------------|------------------------------------------------------------------------------------------------------------------------------|-----------------------------------------------------|------------------|-----------------------------------------------------------------------------------------------------------------------------------------------------------------------------------------------------------------------------------------------------------------------------------------------------------------------------|-----------------------------------------------------------------------|--------------------------------------------------|
| 8 <sup>b</sup> Testa et al.<br>9 [28] 724 adult<br>10 women; USA                       | 1 year; 2 waves                      | -                      | Minor violence from same partner, CTS, last 12 months<br><br>Severe violence from same partner, CTS, last 12 months | Marijuana use, past year                                                                                                     | Yes                                                 | No               | Race; age; cohabiting; married; time 1 psychological aggression; marijuana use                                                                                                                                                                                                                                              | Computer assisted self-interview, and self-administered postal survey | aOR=0.98 (0.59-1.64)<br><br>aOR=1.78 (0.92-3.44) |
| <b>Other combinations of illicit drug use and/or alcohol use as dependent variable</b> |                                      |                        |                                                                                                                     |                                                                                                                              |                                                     |                  |                                                                                                                                                                                                                                                                                                                             |                                                                       |                                                  |
| 16 Gilbert et al.<br>17 [14]; 185 adult<br>18 women; USA                               | 1 year; 3 waves                      | 23.2%                  | Physical, injurious, sexual, CTS, last 6 months<br><br>Physical, CTS, last 6 months                                 | “Drug Use and Risk Behaviour Questionnaire”, any illicit drug use, last 6 months                                             | Yes                                                 | Yes              | Socio-demographics (age, ethnicity, employment, marital status); homelessness; incarceration; childhood sexual abuse, psychological distress; active or avoidant coping; partner illicit drug use; partner binge drinking; financial dependency; sexual relationship power scale; perceived community support; baseline IPV | Interviewer administered                                              | RR=1.15 (0.83-1.58)<br><br>RR=0.9 (0.65-1.26)    |
| 29 Newcomb et al.<br>30 [23]; 113 adult<br>31 women; USA                               | 1 year; 3 waves                      | 24.0%                  | Psychological and/or physical, CTS, past 6 months                                                                   | Participants asked if they had ever used 16 illegal drugs including cocaine, crack, heroin, marijuana and others not listed. | Yes                                                 | No               | Age, education, relationship status                                                                                                                                                                                                                                                                                         | Interviewer administered                                              | Path coefficient=0.18, p<0.05                    |

37  
38  
39  
40  
41  
42  
43  
44  
45  
46  
47

1  
2  
3  
4

| Study, Participants, Country                    | Length of Follow-up; Number of Waves | Attrition at Last Wave | IPV Measure and Timeframe                   | Health Outcome Measure and Timeframe                                                                                                                                | Adjusted for Time 1 Dependent Variable <sup>a</sup> | Adjusted for CSA | Other Variables Adjusted For                                                                                                                                          | Mode of administration                        | Effect Estimate                                                                                                                         |
|-------------------------------------------------|--------------------------------------|------------------------|---------------------------------------------|---------------------------------------------------------------------------------------------------------------------------------------------------------------------|-----------------------------------------------------|------------------|-----------------------------------------------------------------------------------------------------------------------------------------------------------------------|-----------------------------------------------|-----------------------------------------------------------------------------------------------------------------------------------------|
| Nowotny & Graves [16]; 959 adolescents; USA     | 6 years; 2 waves                     | -                      | Physical, CTS-like, last 12 months          | Drug use (MDMA, inhalents, LSD, heroin, PCP or other illegal drugs), last 12 months                                                                                 | Yes                                                 | No               | Age; married; education; employment; personal income                                                                                                                  | Computer assisted personal and self-interview | aOR=1.3 (0.8-2.15)                                                                                                                      |
| Roberts et al. [22]; 2,206 adolescents; USA     | 1 year; 2 waves                      | -                      | Physical, CTS, last 12 months               | Tobacco, alcohol and/or marijuana use, last 12 months                                                                                                               | Yes                                                 | No               | Sociodemographic factors; highest level of abuse by a partner prior to wave 1; number of sexual partners between wave 1 and 2; time elapsed between wave 1 and wave 2 | Computer assisted self-interview              | Beta=0.16 (0.06-2.26), p<0.05                                                                                                           |
| <b>Alcohol use as dependent variable</b>        |                                      |                        |                                             |                                                                                                                                                                     |                                                     |                  |                                                                                                                                                                       |                                               |                                                                                                                                         |
| Boden et al. [49]; 630 adult women; New Zealand | 10 years; 4 waves used               | -                      | Physical and/or sexual, CTS, last 12 months | CIDI - 1 to 2 symptoms versus none, last 12 months<br><br>CIDI - 3 to 5 symptoms versus none, last 12 months<br><br>CIDI - > 5 symptoms versus none, last 12 months | No                                                  | No               | Unadjusted                                                                                                                                                            | Not reported                                  | Population averaged IRR=1.58 (1.37-1.82)<br><br>Population averaged IRR=2.5 (1.88-2.89)<br><br>Population averaged IRR=3.38 (2.57-6.03) |
| El-Bassel et al. [21] 317 adult women; USA      | 1 year; 3 waves                      | 24.0%                  | Physical and/or sexual, CTS, last 6 months  | Binge drinking – drinking 4 or more alcoholic drinks within a 6-hour period) once a week or more in the past 6 months                                               | No                                                  | No               | Socio-demographics; history of trauma (childhood sexual abuse, PTSD); psychological distress; social support; HIV risk behaviours                                     | Interviewer administered                      | aOR=0.80 (0.04-17.0)                                                                                                                    |

39  
40  
41  
42  
43  
44  
45  
46  
47

1  
2  
3  
4  
5  
6  
7  
8  
9  
10  
11  
12  
13  
14  
15  
16  
17  
18  
19  
20  
21  
22  
23  
24  
25  
26  
27  
28  
29  
30  
31  
32  
33  
34  
35  
36  
37  
38  
39  
40  
41  
42  
43  
44  
45  
46  
47

| Study, Participants, Country                  | Length of Follow-up; Number of Waves | Attrition at Last Wave | IPV Measure and Timeframe                                                                                                                                                                                                                                                                                  | Health Outcome Measure and Timeframe                                                                    | Adjusted for Time 1 Dependent Variable <sup>a</sup> | Adjusted for CSA | Other Variables Adjusted For                                                                                                                                                                                                                                                                                                | Mode of administration   | Effect Estimate                                                                                            |
|-----------------------------------------------|--------------------------------------|------------------------|------------------------------------------------------------------------------------------------------------------------------------------------------------------------------------------------------------------------------------------------------------------------------------------------------------|---------------------------------------------------------------------------------------------------------|-----------------------------------------------------|------------------|-----------------------------------------------------------------------------------------------------------------------------------------------------------------------------------------------------------------------------------------------------------------------------------------------------------------------------|--------------------------|------------------------------------------------------------------------------------------------------------|
| Gao et al. [35]; 636 adult women; New Zealand | 2 years; 2 waves                     | 16.9%                  | Verbal aggression at 24 months postpartum only, CTS, last 12 months<br><br>Verbal aggression at 6 weeks and 24 months postpartum only, CTS, last 12 months<br><br>Physical at 24 months postpartum only, CTS, last 12 months<br><br>Physical at 6 weeks and 24 months postpartum only, CTS, last 12 months | High risk alcohol use - drank 6 or more alcoholic drinks on at least one occasion in the last 12 months | No                                                  | No               | Age; education; ethnicity; duration living in New Zealand; marital status; household income; whether born in New Zealand; cultural orientation; composite measures of verbal and physical violence                                                                                                                          | Interviewer administered | aOR=2.68 (0.57-12.62)<br><br>aOR=3.14 (0.71-13.92)<br><br>aOR=1.24 (0.69-2.23)<br><br>aOR=1.49 (0.78-2.84) |
| Gilbert et al. [14]; 185 adult women; USA     | 1 year; 3 waves                      | 23.2%                  | Physical, CTS, last 12 months                                                                                                                                                                                                                                                                              | "Drug Use and Risk Behaviour Questionnaire", Binge drinking, last 6 months                              | Yes                                                 | Yes              | Socio-demographics (age, ethnicity, employment, marital status); homelessness; incarceration; childhood sexual abuse, psychological distress; active or avoidant coping; partner illicit drug use; partner binge drinking; financial dependency; sexual relationship power scale; perceived community support; baseline IPV | Interviewer administered | RR=1.4 (0.97-2.02)                                                                                         |

1  
2  
3  
4

| Study, Participants, Country                  | Length of Follow-up; Number of Waves | Attrition at Last Wave | IPV Measure and Timeframe                                                                                              | Health Outcome Measure and Timeframe                                                                                                                 | Adjusted for Time 1 Dependent Variable <sup>a</sup> | Adjusted for CSA | Other Variables Adjusted For                                                                                                                                                                                                               | Mode of administration                                                                                            | Effect Estimate                                                                                                    |
|-----------------------------------------------|--------------------------------------|------------------------|------------------------------------------------------------------------------------------------------------------------|------------------------------------------------------------------------------------------------------------------------------------------------------|-----------------------------------------------------|------------------|--------------------------------------------------------------------------------------------------------------------------------------------------------------------------------------------------------------------------------------------|-------------------------------------------------------------------------------------------------------------------|--------------------------------------------------------------------------------------------------------------------|
| Keiley et al. [15]; 195 couples; USA          | 2.5 years; 2 waves                   | -                      | Physical, CTS, last 12 months<br><br><br><br><br><br><br><br><br><br>Verbal, CTS, last 12 months                       | ADS and MAST, last 12 months                                                                                                                         | Yes                                                 | No               | Socio-economic status; race; wife's reports of their own anxiety and depression; wife's reports of their own physical and verbal aggression towards husband; wife's reports of their husband's physical and verbal aggression towards them | Self-administered and interviewer administered                                                                    | Slope=0.011<br>Quadratic=0.001<br>NS<br><br><br><br><br><br><br><br><br><br>Slope=-0.009<br>Quadratic=-0.006<br>NS |
| Nowotny & Graves [16]; 2,959 adolescents; USA | 6 years; 2 waves                     | -                      | Threats, minor violence, CTS-like, last 12 months                                                                      | Binge drinking: drinking five or more drinks during a single occasion at least two to three times a month in the past year                           | Yes                                                 | No               | Age; married; education; employment; personal income                                                                                                                                                                                       | Computer assisted personal and self-interview                                                                     | aOR=1.0 (0.71-1.43)                                                                                                |
| Testa et al. 2001 [27]; 494 adult women; USA  | 2 years; 2 waves                     | 9.0%                   | Verbal aggression, CTS, last 12 months<br><br><br><br><br><br><br><br><br><br>Physical aggression, CTS, last 12 months | Alcohol consumption, average daily volume. Heavy drinking index, 6+ drinks single occasion and drinking to intoxication (continuous), last 12 months | Yes                                                 | No               | Race; have a child/pregnant; time 1 marital satisfaction; time 1 verbal aggression                                                                                                                                                         | Self-complete questionnaire at time 1 and in-person/telephone interview and self-complete questionnaire at time 2 | Beta=-0.4; NS<br><br><br><br><br><br><br><br><br><br>Beta=0.09; p<0.05                                             |

39  
40  
41  
42  
43  
44  
45  
46  
47

1  
2  
3  
4  
5  
6  
7  
8  
9  
10  
11  
12  
13  
14  
15  
16  
17  
18  
19  
20  
21  
22  
23  
24  
25  
26  
27  
28  
29  
30  
31  
32  
33  
34  
35  
36  
37  
38  
39  
40  
41  
42  
43  
44  
45  
46  
47

| Study, Participants, Country                    | Length of Follow-up; Number of Waves | Attrition at Last Wave | IPV Measure and Timeframe                                                                                           | Health Outcome Measure and Timeframe                                                                                                                                                         | Adjusted for Time 1 Dependent Variable <sup>a</sup> | Adjusted for CSA | Other Variables Adjusted For                                                                  | Mode of administration                                                | Effect Estimate                                                                             |
|-------------------------------------------------|--------------------------------------|------------------------|---------------------------------------------------------------------------------------------------------------------|----------------------------------------------------------------------------------------------------------------------------------------------------------------------------------------------|-----------------------------------------------------|------------------|-----------------------------------------------------------------------------------------------|-----------------------------------------------------------------------|---------------------------------------------------------------------------------------------|
| Zlotnick et al. [19]; 2,905 adult women; USA    | 5 years; 2 waves                     | -                      | Physical, CTS-like, last 12 months                                                                                  | National Survey of Alcohol and Drug Abuse Questions. Four items coded on a 6-point scale ranging from 0 (abstinent) to 3 (high moderate use) to 5 (binge drinking) past 30 days              | No                                                  | No               | Unadjusted                                                                                    | Self-administered and interviewer administered                        | IPV: Weighted mean score=1.45 (SE=0.19)<br>No IPV: Weighted mean score=0.87 (SE=0.06)<br>NS |
| <b>Alcohol use – IPV as dependent variable</b>  |                                      |                        |                                                                                                                     |                                                                                                                                                                                              |                                                     |                  |                                                                                               |                                                                       |                                                                                             |
| Marsh-Buzy et al. [29]; 73 school students; USA | 4 months, 2 waves                    | 31.1%                  | Physical and/or sexual, CTS, past 4 months                                                                          | Alcohol use – quantity/frequency measure, past 4 months                                                                                                                                      | Yes                                                 | No               | None                                                                                          | Self-administered                                                     | aOR=3.94; p=0.04                                                                            |
| Testa et al. [28]; 724 adult women; USA         | 1 year; 2 waves                      | -                      | Severe violence from same partner, CTS, last 12 months<br><br>Minor violence from same partner, CTS, last 12 months | Heavy episodic drinking in past 12 months consisted of mean response to two questions on frequency of consuming 5 or more drinks in a single day and frequency of drinking until intoxicated | Yes                                                 | No               | Race; age; cohabiting; married; time 1 psychological aggression; marijuana use; hard drug use | Computer assisted self-interview, and self-administered postal survey | aOR=1.0 (0.71-1.4)<br><br>aOR=1.2 (0.93-1.56)                                               |



1  
2  
3  
4

| Study, Participants, Country                                | Length of Follow-up; Number of Waves | Attrition at Last Wave | IPV Measure and Timeframe                          | Health Outcome Measure and Timeframe                                                                                                               | Adjusted for Time 1 Dependent Variable <sup>a</sup> | Adjusted for CSA | Other Variables Adjusted For                                                                                                                           | Mode of administration   | Effect Estimate      |
|-------------------------------------------------------------|--------------------------------------|------------------------|----------------------------------------------------|----------------------------------------------------------------------------------------------------------------------------------------------------|-----------------------------------------------------|------------------|--------------------------------------------------------------------------------------------------------------------------------------------------------|--------------------------|----------------------|
| <b>HIV infection as dependent variable</b>                  |                                      |                        |                                                    |                                                                                                                                                    |                                                     |                  |                                                                                                                                                        |                          |                      |
| El-Bassel et al. [20] 405 adult women; USA                  | 1 year; 3 waves                      | 24.0%                  | Physical and/or sexual, last 6 months              | HIV positive status                                                                                                                                | Yes                                                 | No               | Age; ethnicity; education; drug and alcohol use; baseline HIV risk behaviours                                                                          | Interviewer administered | aOR=0.21 (0.03-1.6)  |
| Jewkes et al. [36] 1,099 women and girls; South Africa      | 2 years; 3 waves                     | 12.5%                  | Physical and/or sexual, WHO Survey, last 12 months | HIV infection assessed with blood tests at all three waves                                                                                         | Yes                                                 | No               | Age; study treatment group; stratum; person years of exposure to HIV (years from baseline to last negative HIV test), herpes simplex virus at baseline | Interviewer administered | IRR=1.51 (1.04-2.21) |
| <b>Sexually transmitted infection as dependent variable</b> |                                      |                        |                                                    |                                                                                                                                                    |                                                     |                  |                                                                                                                                                        |                          |                      |
| Chowdhary & Patel [40]; 1,750 adult women; India            | 1 year; 3 waves                      | -                      | Physical, CTS-like, last 3 months                  | STI (chlamydia, gonorrhoea or trichomoniasis) biological testing, past 3 months                                                                    | No, but removes women who had STI at baseline       | No               | Age; literacy; household per capita income                                                                                                             | Interviewer administered | aOR=1.88 (0.64-5.53) |
| El-Bassel et al. [20] 405 adult women; USA                  | 1 year; 3 waves                      | 24.0%                  | Physical and/or sexual, CTS, last 6 months         | STI infection at wave 3                                                                                                                            | Yes                                                 | No               | Age; ethnicity; education; drug and alcohol use; baseline HIV risk behaviours                                                                          | Interviewer administered | aOR=0.88 (0.53-1.5)  |
| Wilson et al. [45]; 389 adult women; Kenya                  | Up to 2 years; unclear               | -                      | Physical and/or sexual, WHO, last 12 months        | STI at quarterly examination, Presence of gonorrhoeae, chlamydia trachomatis, or trichomonas vaginalis detected by nucleic acid amplification test | No                                                  | No               | Age; baseline alcohol use level; lifetime history of sexual violence since age of 15 by someone other than the index partner                           | Interviewer administered | aRR=0.88 (0.57-1.37) |

34  
35  
36  
37  
38  
39  
40  
41  
42  
43  
44  
45  
46  
47

1  
2  
3  
4  
5  
6  
7  
8  
9  
10  
11  
12  
13  
14  
15  
16  
17  
18  
19  
20  
21  
22  
23  
24  
25  
26  
27  
28  
29  
30  
31  
32  
33  
34  
35  
36  
37  
38  
39  
40  
41  
42  
43  
44  
45  
46  
47

| Study, Participants, Country                       | Length of Follow-up; Number of Waves | Attrition at Last Wave | IPV Measure and Timeframe                   | Health Outcome Measure and Timeframe                                                                                     | Adjusted for Time 1 Dependent Variable <sup>a</sup> | Adjusted for CSA | Other Variables Adjusted For                                                  | Mode of administration                        | Effect Estimate                                                                                       |
|----------------------------------------------------|--------------------------------------|------------------------|---------------------------------------------|--------------------------------------------------------------------------------------------------------------------------|-----------------------------------------------------|------------------|-------------------------------------------------------------------------------|-----------------------------------------------|-------------------------------------------------------------------------------------------------------|
| <b>Sexual risk behaviour as dependent variable</b> |                                      |                        |                                             |                                                                                                                          |                                                     |                  |                                                                               |                                               |                                                                                                       |
| El-Bassel et al. (2010) 405 adult women; USA       | 1 year; 3 waves                      | 24.0%                  | Physical and/or sexual, last 6 months       | Unprotected anal sex<br><br>Condom use consistency<br><br>Condom request consistency<br><br>Multiple concurrent partners | Yes                                                 | No               | Age; ethnicity; education; drug and alcohol use; baseline HIV risk behaviours | Interviewer administered                      | aOR=1.8 (0.58-5.5)<br><br>aOR=0.41 (0.24-0.71)<br><br>aOR=0.42 (0.22-0.82)<br><br>aOR=3.1 (0.89-11.0) |
| Teitelman et al. (2015); 2,629 adolescents; USA    | 7 years; 2 waves<br>Is it 2 waves    | -                      | Verbal and/or physical, CTS, last 12 months | HIV risk (condom use), last 12 months                                                                                    | Yes                                                 | No               | Age; race/ethnicity; family income                                            | Computer assisted personal and self-interview | aOR=1.59 (1.16-2.18)                                                                                  |

1  
2  
3  
4  
5  
6  
7  
8  
9  
10  
11  
12  
13  
14  
15  
16  
17  
18  
19  
20  
21  
22  
23  
24  
25  
26  
27  
28  
29  
30  
31  
32  
33  
34  
35  
36  
37  
38  
39  
40  
41  
42  
43  
44  
45  
46  
47

| Study, Participants, Country               | Length of Follow-up; Number of Waves | Attrition at Last Wave | IPV Measure and Timeframe                   | Health Outcome Measure and Timeframe                                                    | Adjusted for Time 1 Dependent Variable <sup>a</sup> | Adjusted for CSA | Other Variables Adjusted For                                                                                                 | Mode of administration   | Effect Estimate      |
|--------------------------------------------|--------------------------------------|------------------------|---------------------------------------------|-----------------------------------------------------------------------------------------|-----------------------------------------------------|------------------|------------------------------------------------------------------------------------------------------------------------------|--------------------------|----------------------|
| Wilson et al. [45]; 389 adult women; Kenya | Up to 2 years; unclear               | -                      | Physical and/or sexual, WHO, last 12 months | Unprotected anal and/or vaginal sex, past week                                          | No                                                  | No               | Age; baseline alcohol use level; lifetime history of sexual violence since age of 15 by someone other than the index partner | Interviewer administered | aRR=1.91 (1.32-2.78) |
|                                            |                                      |                        |                                             | 100% condom use, past week                                                              |                                                     |                  |                                                                                                                              |                          | aRR=0.90 (0.82-0.99) |
|                                            |                                      |                        |                                             | 2 or more sexual partners, past week                                                    |                                                     |                  |                                                                                                                              |                          | aRR=0.96 (0.76-1.21) |
|                                            |                                      |                        |                                             | 3 or more sex acts, past week                                                           |                                                     |                  |                                                                                                                              |                          | aRR=1.0 (0.79-1.26)  |
|                                            |                                      |                        |                                             | Semen detection by prostate specific antigen test PSA as a biomarker of unprotected sex |                                                     |                  |                                                                                                                              |                          | aRR=1.54 (1.17-2.04) |
|                                            |                                      |                        |                                             | No sex in the past week                                                                 |                                                     |                  |                                                                                                                              |                          | aRR=0.67 (0.54-0.83) |

1  
2  
3  
4  
5  
6  
7  
8  
9  
10  
11  
12  
13  
14  
15  
16  
17  
18  
19  
20  
21  
22  
23  
24  
25  
26  
27  
28  
29  
30  
31  
32  
33  
34  
35  
36  
37  
38  
39  
40  
41  
42  
43  
44  
45  
46  
47

| Study, Participants, Country                                  | Length of Follow-up; Number of Waves | Attrition at Last Wave | IPV Measure and Timeframe         | Health Outcome Measure and Timeframe      | Adjusted for Time 1 Dependent Variable <sup>a</sup> | Adjusted for CSA | Other Variables Adjusted For               | Mode of administration   | Effect Estimate      |
|---------------------------------------------------------------|--------------------------------------|------------------------|-----------------------------------|-------------------------------------------|-----------------------------------------------------|------------------|--------------------------------------------|--------------------------|----------------------|
| <b>Gynaecological problems as dependent variable</b>          |                                      |                        |                                   |                                           |                                                     |                  |                                            |                          |                      |
| <sup>c</sup> Chowdhary & Patel [39]; 1,750 adult women; India | 1 year; 3 waves                      | -                      | Physical, CTS-like, last 3 months | Abnormal vaginal discharge, last 3 months | No, but removes women who had condition at baseline | No               | Age; literacy; household per capita income | Interviewer administered | aOR=1.06 (0.44-2.58) |
|                                                               |                                      |                        | Sexual, CTS-like, last 3 months   | Dysuria, last 3 months                    |                                                     |                  |                                            |                          | aOR=1.57 (0.6-4.14)  |
|                                                               |                                      |                        | Physical, CTS-like, last 3 months | Lower abdominal pain, last 3 months       |                                                     |                  |                                            |                          | aOR=1.2 (0.63-2.32)  |
|                                                               |                                      |                        | Physical, CTS-like, last 3 months | Dyspareunia, last 3 months                |                                                     |                  |                                            |                          | aOR=2.15 (0.8-5.82)  |

<sup>a</sup> Refers to the dependent variable

<sup>b</sup> Estimates are mutually exclusive as based on different sub-samples

<sup>c</sup> More than one estimate reported in the study, but preference given to one estimate using the following algorithm: estimate derived from multivariate analysis; the definition of IPV closely matches that of other studies in the health outcome group; where the reference group was unexposed to any violence; where the estimate was most precise

NS, Not statistically significant

CSA, Childhood sexual abuse

AAS, Abuse Assessment Screen; ADS, Alcohol Dependence Scale; BDI, Beck Depression Inventory; CAS, Composite Abuse Scale; CES-D, Center for Epidemiological Studies-Depression; CIDI-SF, Composite International Diagnostic Interview-Short Form; CTS, Conflict Tactics Scale; HADS, Hospital Anxiety and Depression Scale; ISA, Index of Spouse Abuse; MAST, Michigan Alcoholism Screening Test; PHQ-9, Patient Health Questionnaire; SRQ, Self-Report Questionnaire; SVAWS, Severity of Violence Against Women Scale

## Results

### *Study characteristics*

Thirty-five separate cohort studies described in 36 articles published between 2002 and 2017 with 48,863 participants met the inclusion criteria and contained 174 effect estimates of association between IPV and health outcomes. Eighteen articles were from the USA,<sup>13-30</sup> three from Australia,<sup>31-33</sup> two from New Zealand,<sup>34,35</sup> three from South Africa,<sup>36-38</sup> two from India,<sup>39,40</sup> one from Puerto Rico,<sup>41</sup> one from Spain,<sup>42</sup> one from Korea,<sup>43</sup> one from Nicaragua,<sup>44</sup> one from Kenya,<sup>45</sup> one from Japan,<sup>46</sup> one from the UK,<sup>47</sup> and one from Tanzania.<sup>48</sup> Amongst the 35 cohort studies, 11 were household surveys,<sup>13,19,27,28,32,35,39,43,44,47,49</sup> 14 sampled participants from clinical settings,<sup>14,20,21,23,25,26,30,31,33</sup> {Rogathi, 2017 #4192 40 42 45 46} seven from schools,<sup>16,17,22,24,29,36,50</sup> and three from the local community.<sup>15,38,41</sup> Some studies were based on sub-populations of women including one study (reported in two papers) of women receiving methadone maintenance treatment,<sup>20,21</sup> women attending a clinic with depressive symptoms at baseline,<sup>31</sup> HIV-positive female sex workers,<sup>45</sup> and eight studies of pregnant women.<sup>30,33,38,40,42,46-48</sup> Six studies focussed on adolescents<sup>16-18,22,24,29</sup> and one (reported in two papers) included women and young girls.<sup>36,37</sup>

Table 2 presents the different health outcomes measured in the studies, the number of studies that measure each health condition, the overall number of estimates that contribute to each health condition, and the number of estimates that contribute to the meta-analysis.

**Table 2: Health outcomes/health risk behaviours measured in the 35 studies and number of estimates**

| Health outcome                                 | Number of studies and estimates, refs                             | Number of estimates in the meta-analysis |
|------------------------------------------------|-------------------------------------------------------------------|------------------------------------------|
| Depression                                     | 13 studies; <sup>13 17 19 22-26 31 32 37 39 43</sup> 13 estimates | 7                                        |
| Postpartum depression                          | 8 studies; <sup>30 33 38 40 42 46-48</sup> 11 estimates           | 7                                        |
| Suicide attempts                               | 2 studies; <sup>22 39</sup> 2 estimates                           | NA                                       |
| Perceived stress                               | 2 studies; <sup>27 44</sup> 3 estimates                           | NA                                       |
| General anxiety                                | 1 study; <sup>25</sup> 1 estimate                                 | NA                                       |
| Self-perceived health status                   | 1 study; <sup>42</sup> 1 estimate                                 | NA                                       |
| Hard drug use                                  | 4 studies; <sup>14 21 28 41</sup> 6 estimates                     | 5                                        |
| Marijuana use                                  | 4 studies; <sup>14 16 21 28</sup> 7 estimates                     | 5                                        |
| Other combinations of illicit drug/alcohol use | 4 studies; <sup>14 16 22 23</sup> 5 estimates                     | NA                                       |
| Alcohol use                                    | 10 studies; <sup>14-16 19 21 27 29 35 49</sup> 18 estimates       | 9                                        |
| HIV infection                                  | 2 studies; <sup>20 36</sup> 3 estimates                           | NA                                       |
| STIs                                           | 3 studies; <sup>20 39 45</sup> 2 estimates                        | NA                                       |
| Sexual risk behaviours                         | 3 studies; <sup>18 20 45</sup> 8 estimates                        | NA                                       |
| Abnormal vaginal discharge                     | 1 study; <sup>39</sup> 3 estimates                                | NA                                       |
| Dysuria                                        | 1 study; <sup>39</sup> 3 estimates                                | NA                                       |
| Lower abdominal pain                           | 1 study; <sup>39</sup> 3 estimates                                | NA                                       |
| Dyspareunia                                    | 1 study; <sup>39</sup> 3 estimates                                | NA                                       |

NA- Not applicable as study estimates were continuous and could not be included in a meta-analysis

Table 1 summarises quality issues in relation to the 36 papers reporting on 35 separate cohort studies included in the review. All but three of the 35 cohort studies used recognised, validated IPV instruments or used items that were taken from validated instruments.<sup>40 43 47</sup> All, but nine studies assessed for IPV that occurred in the last 12 months; one measured IPV in the last three months,<sup>39</sup> two in the last six months,<sup>20 21 23</sup> one in the last four months,<sup>29</sup> four measured IPV that occurred during pregnancy,<sup>40 46-48</sup> and one measure IPV during or within 12 months of pregnancy.<sup>30</sup> Most of the studies assessed for physical and/or sexual violence from a partner, with some also including threats, emotional or verbal abuse. The attrition rate was reported or calculated in 19 studies and ranged from 4.6%<sup>48</sup> to 37.4%.<sup>31</sup> The length of follow-up ranged from one month<sup>46</sup> to ten years<sup>49</sup> and the number of waves ranged from two (multiple studies) to six.<sup>33</sup> The smallest sample size was 73 adolescents<sup>29</sup> and the largest was 1,303 adult women<sup>48</sup>. Table 1 presents all study estimates grouped by health outcome.

### ***IPV and depressive symptoms***

Thirteen studies examined the relationship between recent IPV and depressive symptoms<sup>13 17 19 22-26 31 32 37 39 43</sup> of which one examined the association in both directions.<sup>43</sup> Of these, nine studies provided nine estimates of association between IPV and subsequent depressive symptoms.<sup>13 19 22 23 25 31 32 39 43</sup> Eight of these estimates showed a positive direction of association between experience of IPV and subsequent depressive symptoms.<sup>9 13 19 22 23 31 32 39</sup> Of the nine estimates of the association between IPV and subsequent depression, all but two reached statistical significance.<sup>25 39</sup> Five studies provided five estimates of association between depression and subsequent IPV, all of which showed a positive and statistically significant relationship.<sup>17 24 26 37 43</sup>

We were able to include seven estimates reporting binary IPV measures and binary depressive symptoms or disorder measures in the meta-analysis. For IPV and subsequent depressive symptoms or disorder, the pooled OR from five estimates<sup>13 25 31 32 39</sup> was 1.76 (95% CI 1.26-2.44,  $I^2 = 37.5%$   $p=0.172$ ). Two estimates<sup>17 37</sup> were included in the meta-analysis of the relationship between depressive symptoms and subsequent IPV, resulting in a pooled OR of 1.72 (95% CI 1.28-2.31,  $I^2 = 0.0%$ ,  $p=0.752$ ). One study, not included in the meta-analyses examined the bi-directional relationship between IPV and depression.<sup>43</sup> A Korean study of married women found that IPV at Wave 1 was positively associated with the depression level at Wave 1 (Beta=0.030, SE=0.03,  $p<0.001$ ), but negatively associated with the growth rate of depression over the study period (Beta=-0.03, SE=0.01,  $p=0.004$ ). IPV experienced at Wave 4 was associated with a larger growth rate of depression in the model (Beta=3.34, SE=0.61,  $p<0.001$ ) and the experience of IPV at Wave 1 (Beta=0.68, SE=0.11,  $p<0.001$ ). See Figure 2.

1  
2  
3 **Depression measurement:** Of the nine studies that measured IPV and subsequent depressive  
4 symptoms, one measured depressive symptoms occurring in the past 12 months,<sup>25</sup> one in the  
5 last two weeks,<sup>31</sup> five in the last week,<sup>13 19 22 32 43</sup> one “current”,<sup>39</sup> and one did not specify a  
6 time period.<sup>23</sup> Of the five studies that measured depressive symptoms and subsequent IPV,  
7 three measured depressive symptoms in the past week,<sup>17 37 43</sup> one in the past six months,<sup>24</sup> and  
8 one did not specify a time period.<sup>26</sup>  
9  
10  
11  
12  
13  
14  
15

16  
17  
18 All but one of the studies used screening questionnaires that measured depressive symptoms  
19 as opposed to diagnostic tools. Of the 13 studies, eight used the Center for Epidemiologic  
20 Studies Depression Scale (CES-D),<sup>13 17 19 22 23 32 37 43</sup> one study used the WHO ICD-10,<sup>39</sup> one  
21 used the Composite International Diagnostic Interview-Short Form (CIDI-SF),<sup>25</sup> one used the  
22 Patient Health Questionnaire (PHQ),<sup>31</sup> one used the Beck Depression Inventory (BDI),<sup>26</sup> and  
23 one used a scale from Kandel and Davies.<sup>24</sup>  
24  
25  
26  
27  
28  
29  
30  
31  
32

33 **Common risk factors/confounding:** Of the nine studies that measured IPV and subsequent  
34 depressive symptoms and disorder, all but one controlled for time one levels of depression.  
35 Chowdhary & Patel<sup>39</sup> excluded women with baseline depressive disorder in their analysis, but  
36 this may have resulted in the exclusion of cases of IPV that preceded depressive symptoms at  
37 baseline and the remaining cases may not have been representative of women experiencing  
38 IPV. All, but one of the five studies that measured depressive symptoms and later IPV,  
39 controlled for time one levels of IPV.<sup>26</sup> Of the 13 studies, all but 2 controlled for socio-  
40 demographic factors.<sup>26 39</sup> Other confounders were not comprehensively controlled for. Two  
41 studies controlled for childhood physical and/or sexual abuse<sup>17 31</sup> and two for alcohol use,<sup>24 37</sup>  
42 of which one also controlled for childhood adversity which measured emotional and physical  
43 neglect, and physical and sexual abuse.<sup>37</sup> There were no discernible differences in effect  
44  
45  
46  
47  
48  
49  
50  
51  
52  
53  
54  
55  
56  
57  
58  
59  
60



1  
2  
3 estimates regardless of which confounders were adjusted for and studies found similar  
4  
5 directions and varying magnitudes of association.  
6  
7

### 9 *IPV and postpartum depressive symptoms*

10  
11 Eight studies provided eleven estimates of association between IPV and subsequent  
12  
13 postpartum depressive symptoms.<sup>30 33 38 40 42 46-48</sup> All eleven estimates showed a positive  
14  
15 direction of association between IPV and subsequent postpartum depressive symptoms, with  
16  
17 all but one of the estimates reaching statistical significance.<sup>46</sup> Seven estimates from three  
18  
19 studies were included in the meta-analysis of the relationship between IPV and subsequent  
20  
21 postpartum depression,<sup>33 47 42 30 48</sup> resulting in a pooled OR of 2.19 (95% CI 1.39-3.45). This  
22  
23 was heterogeneous ( $I^2 = 79.8\%$ ,  $p=0.000$ ). One of the studies examined the bi-directional  
24  
25 relationship and found that depression symptom severity was associated with a greater risk of  
26  
27 subsequent IPV.<sup>38</sup> Each five point difference in the Edinburgh Postnatal Depression Scale  
28  
29 was associated with a 0.9 to 2.3 point difference in subsequent IPV risk (Beta=0.054; 95% CI  
30  
31 0.030-0.079).  
32  
33  
34  
35  
36

37 **Postpartum depression measurement:** Of the eight studies that measured IPV and  
38  
39 subsequent depressive symptoms, one measured depressive symptoms occurring in the past  
40  
41 12 months,<sup>42</sup> six studies measured depressive symptoms in the last week,<sup>33 38 40 46 47 48</sup> and one  
42  
43 study did not specify the time period.<sup>30</sup> One study measured postpartum depression in the last  
44  
45 week and subsequent IPV<sup>38</sup>. Of the eight studies, six used the Edinburgh Postnatal  
46  
47 Depression Scale (EPDS),<sup>33 38 40 42 47 48</sup> one used the Hospital Anxiety and Depression Scale  
48  
49 (HADS),<sup>46</sup> and one used the Beck Depression Inventory (BDI).<sup>30</sup>  
50  
51  
52  
53  
54  
55  
56  
57  
58  
59  
60

1  
2  
3 **Common risk factors/confounding:** Six of the eight studies that examined IPV and  
4 subsequent postpartum depression controlled for time one levels of depressive symptoms.<sup>33 38</sup>  
5  
6  
7 <sup>42 46 47 30</sup> One study did not control for time one levels of depressive symptoms as it was not  
8 significant in the bivariate analysis.<sup>48</sup> Five studies controlled for socio-demographic  
9 factors.<sup>33 38 42 46 48</sup> One study controlled for HIV serostatus<sup>38</sup> and one controlled for  
10 HIV/AIDS diagnosis.<sup>48</sup>  
11  
12  
13  
14  
15

### 16 *IPV and alcohol use*

17  
18 Ten studies examined the relationship between recent IPV and alcohol use. Of these, eight  
19 studies provided 15 estimates of association between IPV and subsequent alcohol use.<sup>14-16 19</sup>  
20  
21  
22 <sup>21 27 35 49</sup> All, but one of these 15 estimates showed a positive direction of association between  
23 IPV and subsequent alcohol use,<sup>15</sup> with two studies providing five estimates which reached  
24 statistical significance.<sup>27 49</sup> Two studies<sup>28 29</sup> provided three estimates showing a positive  
25 direction of association between alcohol use and subsequent IPV, of which one was  
26 statistically significant.<sup>29</sup>  
27  
28  
29  
30  
31  
32  
33  
34  
35  
36

37 For IPV and later alcohol use, the pooled OR from six estimates provided by three studies<sup>16 21</sup>  
38 <sup>35</sup> was 1.19 (95% CI 0.91-1.55,  $I^2 = 0.0\%$ ,  $p=0.523$ ). Three estimates from two studies<sup>28 29</sup>  
39 were included in the meta-analysis of the relationship between alcohol use and subsequent  
40 IPV, resulting in a pooled OR of 1.11 (95% CI 0.91-1.35,  $I^2 = 0.0\%$ ,  $p=0.672$ ).  
41  
42  
43  
44  
45  
46  
47

48 **Alcohol use measurement:** Of the eight studies that measured IPV and subsequent alcohol  
49 use, five measured alcohol use in the last 12 months,<sup>15 16 27 35 49</sup> two in the last six months,<sup>21 14</sup>  
50 and one in the last 30 days.<sup>19</sup> Of the two studies that measured alcohol use and subsequent  
51 IPV, one measured alcohol use in the last 12 months<sup>28</sup> and one in the last four months.<sup>29</sup>  
52  
53  
54  
55  
56  
57

1  
2  
3 Alcohol consumption was measured in a variety of ways. Of the 10 studies, one assessed  
4 alcohol abuse or dependence using the CIDI-SF,<sup>49</sup> four measured binge drinking which was  
5 based on the number of alcoholic drinks consumed on one occasion,<sup>14 16 21 35</sup> three measured  
6 heavy drinking which was assessed using a combined quantity-frequency measure,<sup>27-29</sup> one  
7 used the Alcohol Dependence Scale (ADS) and the Michigan Alcohol Screening Test  
8 (MAST),<sup>15</sup> and one used the National Survey of Alcohol and Drug Abuse (NSDUH).<sup>19</sup>

17  
18 **Common risk factors/confounding:** Of the eight studies that measured IPV and subsequent  
19 alcohol use, only four adjusted for time one levels of alcohol use.<sup>14-16 27</sup> Both studies that  
20 examined the association between alcohol use and subsequent IPV adjusted for time one  
21 levels of IPV.<sup>28 29</sup> Of the 10 studies, 7 controlled for socio-demographic factors.<sup>14-16 21 27 28 35</sup>  
22 Two studies adjusted for a history of trauma. El-Bassel<sup>21</sup> controlled for childhood sexual  
23 abuse, post-traumatic stress disorder, multiple concurrent partners and frequency of condom  
24 use. Gilbert<sup>14</sup> also controlled for childhood sexual abuse as well as psychological distress,  
25 coping strategies, the partner's illicit drug use and binge drinking and sexual relationship  
26 power. Regardless of the confounders controlled for, all but one study found a positive  
27 direction of association and reported varying magnitudes of association.

### 41 ***IPV and hard drug use (crack, cocaine, heroin)***

42 Four studies examined the relationship between recent IPV and hard drug use,<sup>14 21 28 41</sup> of  
43 which one reported an association in both directions.<sup>21</sup> Two studies provided two estimates of  
44 IPV and subsequent hard drug use, both of which showed a positive direction of association  
45 although only one was statistically significant.<sup>21 41</sup> The pooled OR from these studies was  
46 2.05 (95% CI 1.19-3.52,  $I^2 = 0.0\%$ ,  $p=0.948$ ). Three studies provided four estimates of hard  
47 drug use and subsequent IPV, which showed a positive direction of association and three of

1  
2  
3 these were statistically significant.<sup>14 21 28</sup> Three of these estimates were included in the meta-  
4 analysis, resulting in a pooled OR of 2.20 (95% CI 1.52-3.17,  $I^2 = 0.0\%$ ,  $p=0.455$ ).  
5  
6  
7

8  
9 **Hard drug use measurement:** Of the two studies that measured IPV and subsequent hard  
10 drug use, one study measured drug use in the last 12 months<sup>41</sup> and the other in the last 6  
11 months.<sup>21</sup> Of the three studies that measured hard drug use and subsequent IPV, one assessed  
12 use in the last 12 months<sup>28</sup> and two in the last six months.<sup>14 21</sup> Of the four studies, two used  
13 the Drug Use and Risk Behaviour Questionnaire<sup>14 21</sup> and two asked about use of specific hard  
14 drugs including crack, cocaine and heroin.<sup>28 41</sup> Of the latter, one of the studies used two  
15 methods for assessing hard drug use at each wave including self-report information only and  
16 combined self-report and toxicological information.<sup>41</sup>  
17  
18  
19  
20  
21  
22  
23  
24  
25  
26  
27

28  
29 **Common risk factors/confounding:** Of the two studies that measured IPV and subsequent  
30 hard drug use, one controlled for time one levels of hard drug use<sup>41</sup>. Of the three studies that  
31 measured hard drug use and subsequent IPV, two controlled for time one levels of IPV.<sup>14 28</sup>  
32 All four studies controlled for socio-demographic factors. El-Bassel<sup>21</sup> controlled for  
33 childhood sexual abuse, post-traumatic stress disorder, multiple concurrent partners and  
34 frequency of condom use. Gilbert<sup>14</sup> controlled for childhood sexual abuse, psychological  
35 distress, coping strategies, the partner's illicit drug use and binge drinking and sexual  
36 relationship power.  
37  
38  
39  
40  
41  
42  
43  
44  
45  
46  
47

#### 48 ***IPV and marijuana use***

49

50 Four studies examined the relationship between recent IPV and marijuana use,<sup>14 16 21 28</sup> of  
51 which two studies reported an association in both directions.<sup>14 21</sup> Three studies provided three  
52 estimates of IPV and subsequent marijuana use, all showing a positive direction of  
53  
54  
55  
56  
57

1  
2  
3 association, although none were statistically significant.<sup>14 16 21</sup> Two of these studies were  
4 included in the meta-analysis resulting in a pooled OR of 1.52 (95% CI 1.04-2.24,  $I^2 = 5.4%$ ,  
5  $p=0.304$ ). Three studies provided four estimates of marijuana use and subsequent IPV<sup>14 21 28</sup>  
6 of which one showed a positive and statistically significant relationship. Three of these  
7 estimates were included in the meta-analysis, resulting in a pooled OR of 1.96 (95% CI 0.8-  
8 4.83). This was heterogeneous ( $I^2 = 85.4%$ ,  $p=0.001$ ).  
9  
10  
11  
12  
13  
14  
15

16  
17  
18 **Marijuana use measurement:** Of the four studies, two measured marijuana use in the last  
19 12 months<sup>16 28</sup> and two in the last six months.<sup>14 21</sup> All studies used self-report information to  
20 assess for marijuana use.  
21  
22  
23  
24  
25

26  
27 **Common risk factors/confounding:** Of the three studies that measured IPV and subsequent  
28 marijuana use, two controlled for time levels of marijuana use.<sup>14 16</sup> Of the three studies that  
29 measured marijuana use and subsequent IPV, two controlled for time levels of IPV.<sup>14 28</sup> All  
30 the studies controlled for socio-demographic factors. El-Bassel<sup>21</sup> controlled for childhood  
31 sexual abuse, post-traumatic stress disorder, multiple concurrent partners and frequency of  
32 condom use. Gilbert<sup>14</sup> controlled for childhood sexual abuse, psychological distress, coping  
33 strategies, the partner's illicit drug use and binge drinking and sexual relationship power.  
34  
35  
36  
37  
38  
39  
40  
41  
42  
43

#### 44 ***IPV and STIs (excluding HIV)***

45  
46 Three studies provided three estimates of the association between recent IPV and subsequent  
47 STIs<sup>20 39 45</sup> of which one showed a positive and statistically significant relationship.<sup>39</sup> The  
48 meta-analysis of two of these studies<sup>20 39</sup> resulted in a pooled OR of 1.10 (95% CI 0.56-2.18,  
49  $I^2 = 35.5%$ ,  $p=0.214$ ).  
50  
51  
52  
53  
54  
55  
56  
57  
58  
59  
60

1  
2  
3 **STI measurement:** One study assessed for STIs (chlamydia, gonorrhoea or trichomoniasis)  
4 within the last three months using biological measures,<sup>39</sup> another relied on self-report to  
5 assess for STIs at the last wave<sup>20</sup> and the third study assessed women quarterly for  
6 gonorrhoeae, chlamydia or trichomoniasis.<sup>45</sup>  
7  
8  
9  
10

11  
12  
13 **Common risk factors/confounding:** All the studies controlled for socio-demographic  
14 factors. El-Bassel's study<sup>21</sup> of women attending a methadone maintenance clinic adjusted for  
15 time one HIV risk factors (i.e. frequency of condom use, frequency of requesting condom  
16 use, having unprotected anal sex, exchanging sex for drugs, being HIV positive and having  
17 had an STI), as well as drug and alcohol use. Chowdhary & Patel<sup>39</sup> removed women with an  
18 STI at time one from the analysis. However, this would likely have introduced bias in the  
19 resulting cases, as it would have excluded women with IPV that preceded the acquisition of  
20 an STI at baseline. Wilson's<sup>45</sup> study of HIV positive sex workers did not control for time one  
21 sexual risk behaviours, although it did control for a lifetime history of sexual violence since  
22 the age of 15 by someone other than the index partner. Figure 3 presents the forest plots for  
23 alcohol use, hard drug use, marijuana use and STIs.  
24  
25  
26  
27  
28  
29  
30  
31  
32  
33  
34  
35  
36  
37  
38

## 39 **Discussion**

### 40 ***Summary of main findings***

41  
42 Our review identified cohort studies that examined the relationship between recent IPV (i.e.  
43 IPV occurring up to and including the last 12 months) and depression, postpartum depression,  
44 alcohol use, hard drug use, marijuana use and STIs. Although a few other health or health  
45 related outcomes were identified (i.e. sexual risk behaviours, HIV infection, general anxiety,  
46 perceived stress and gynaecological problems) these could not be included in a meta-analysis  
47 because there was only one estimate. We found evidence consistent with a bi-directional  
48 relationship between recent IPV and depressive symptoms. Recent IPV was also associated  
49  
50  
51  
52  
53  
54  
55  
56  
57  
58  
59  
60

1  
2  
3 with increased symptoms of postpartum depression. There was some evidence of a bi-  
4  
5 directional relationship between recent IPV and hard drug use, and IPV and subsequent  
6  
7 marijuana use although there were a limited number of studies. There was no evidence of an  
8  
9 association between recent IPV and alcohol or STIs although the evidence was weak with  
10  
11 few studies and inconsistent measurement of alcohol and STIs.  
12  
13

14  
15 Although the search strategy did not limit the types of health outcomes identified, the review  
16  
17 found no cohort studies for recent IPV exposure and non-communicable diseases such as  
18  
19 cardiovascular disease, hypertension and obesity. Nor did we find longitudinal evidence for  
20  
21 recent experience of IPV and posttraumatic stress disorder or anxiety disorder. There is  
22  
23 limited evidence from cross-sectional data that lifetime IPV increases the risk of  
24  
25 cardiovascular disease.<sup>51</sup> Cohort studies measuring past history of IPV have reported an  
26  
27 association with increased body mass index,<sup>52</sup> increased risk for cardiovascular disease<sup>53</sup> and  
28  
29 hypertension.<sup>54</sup> Physiological mechanisms may explain the association between IPV and  
30  
31 some adverse health outcomes through complex neural, neuroendocrine and immune  
32  
33 responses to acute and chronic stress. For example, sustained and acute elevated stress levels  
34  
35 have been linked to cardiovascular disease, hypertension, gastrointestinal disorders and  
36  
37 chronic pain. When exposed to prolonged or acute stress, areas of the brain (e.g.  
38  
39 hippocampus, amyglada and prefrontal cortex) undergo structural changes that can impact on  
40  
41 mental and cognitive functioning, which can lead to mental disorders.<sup>55</sup>  
42  
43  
44  
45  
46  
47

48 We found evidence consistent with a bi-directional relationship between recent experience of  
49  
50 IPV and depressive symptoms. The magnitude of the association in either direction is similar  
51  
52 to that reported in our previous review of 'ever' IPV and depressive symptoms<sup>4</sup> although  
53  
54 there were fewer estimates in our meta-analysis of recent IPV and depressive symptoms.  
55  
56  
57

1  
2  
3 All the studies on postpartum depressive symptoms conceptualised IPV as the dependent  
4 variable and there was evidence that recent experience of IPV or IPV during pregnancy  
5 increased symptoms of subsequent postpartum depression although there was substantial  
6 heterogeneity. The magnitude of the association was slightly lower (OR=2.19, 95% CI 1.39-  
7 3.45) compared to Howard et al.<sup>56</sup> who reported a three-fold increase in the levels of  
8 depressive symptoms in the postnatal period after having experienced IPV during pregnancy  
9 (OR=3.1, 95% CI 2.7-3.6). However, the authors state that study heterogeneity and lack of  
10 data on baseline symptoms prevented conclusions on temporality. In addition, we excluded  
11 one study that was included in the Howard et al review as it measures postnatal depressive  
12 symptoms using the Edinburgh Postnatal Depression Scale (EPDS) at the final wave, but  
13 assesses common mental health disorders during pregnancy with the Self-Reporting  
14 Questionnaire (SRQ-20).<sup>57</sup> A recently published systematic review explored studies of IPV  
15 during pregnancy and perinatal mental disorders in low and middle income countries.  
16 However, most of the studies were cross-sectional and consider partner violence experienced  
17 during pregnancy. Furthermore, estimates were not pooled in a meta-analysis.<sup>58</sup>

18  
19  
20  
21  
22  
23  
24  
25  
26  
27  
28  
29  
30  
31  
32  
33  
34  
35  
36  
37 There was no evidence of an association between recent IPV and alcohol use in either  
38 direction. This might be because there were fewer estimates in the meta-analysis of recent  
39 IPV and measurement of problematic alcohol use was conceptualised in a number of different  
40 ways for example, binge drinking, heavy episodic drinking and high risk alcohol use, which  
41 may have diluted the effect. None of the estimates in the meta-analysis measured alcohol use  
42 disorder. Furthermore, few estimates in the meta-analysis controlled for time one levels of  
43 IPV or alcohol use, and none included the perpetrator's alcohol use which may be related to  
44 IPV and/or the woman's drinking behaviour. This finding is in contrast to our previous  
45 review of 'ever' IPV and alcohol use which did find evidence consistent with a bi-directional  
46  
47  
48  
49  
50  
51  
52  
53  
54  
55  
56  
57  
58  
59  
60



1  
2  
3 relationship.<sup>5</sup> Although the pooled estimates in both reviews are based studies that assess  
4 binge drinking, the Devries review includes estimates of IPV that occurred in the distant past  
5 (i.e. before the last 12 months).  
6  
7  
8  
9

10  
11 Our review found evidence consistent with a bi-directional relationship between recent IPV  
12 and hard drug use. However, this finding should be treated with caution as there were very  
13 few studies overall, and one of the studies was based on a sample of women attending a  
14 methadone maintenance clinic. For marijuana use, there were few studies, but the evidence  
15 suggests that IPV predicts subsequent marijuana use. Pooled estimates did not support that  
16 marijuana use predicts subsequent IPV, although estimates were heterogeneous. The evidence  
17 for recent IPV and STI infection was in conflicting directions and there were only two  
18 estimates. Our review adds to previous systematic reviews as it focuses on longitudinal  
19 studies that measure recent experiences of IPV. Furthermore it includes a broader range of  
20 health or health related outcomes and explores bi-directionality. The review also highlights  
21 that longitudinal studies on recent IPV are lacking for important health outcomes that are  
22 known to be associated with partner violence.  
23  
24  
25  
26  
27  
28  
29  
30  
31  
32  
33  
34  
35  
36  
37  
38  
39

#### 40 **Limitations of the review**

41 To our knowledge, this is the first systematic review of cohort studies to measure the  
42 magnitude of the association between recent exposure to IPV and health outcomes. Although  
43 we conducted an extensive search of the global literature, the review has a number of  
44 limitations. Due to the large number of abstracts retrieved and the limited timeframe for the  
45 review, we were not able to employ double screening of abstracts. Citation tracking was not  
46 undertaken although we conducted reference list screening of key systematic review papers.  
47  
48  
49  
50  
51  
52  
53  
54  
55 However, two researchers reviewed the final set of included papers. One researcher was  
56  
57  
58  
59  
60

1  
2  
3 responsible for extracting data from included papers. As some studies measured the outcome  
4  
5 variable (either IPV or the health condition) continuously, it was not possible to combine all  
6  
7 measures of effect, which limited the number of studies in the meta-analyses. However, we  
8  
9 comment on the direction of the association of studies that were not included in the meta-  
10  
11 analysis in the results section for each health condition. It was not possible to quantitatively  
12  
13 assess publication bias as too few studies were in the meta-analyses of each health condition.  
14  
15

### 16 17 18 **Sources of bias and limitations of included studies**

19  
20 One of the main limitations of the included studies relates to the lack of consistency in  
21  
22 controlling for key potential confounders. With regard to studies on depression, hard drug use  
23  
24 and marijuana use, most controlled for time one levels of the health condition or IPV (where  
25  
26 IPV was the dependent variable). Far fewer of the estimates on IPV and later alcohol use and  
27  
28 IPV and STI controlled for time one levels of the health outcome.  
29  
30

31  
32  
33 With regard to the studies on depressive symptoms, only two controlled for early childhood  
34  
35 trauma (i.e. childhood sexual and/or physical abuse) and two controlled for alcohol use, even  
36  
37 though both are known to increase the risk for depression.<sup>59 60</sup> This makes it difficult to rule  
38  
39 them out as potential contributors to the causation of the outcomes. Nevertheless, we found  
40  
41 that studies showed a positive direction of association, regardless of which variables were  
42  
43 adjusted for, and there was no clear pattern of differing magnitude of association that  
44  
45 indicated the relationship between IPV and depressive symptoms were not likely to be  
46  
47 entirely accounted for by shared risk factors.  
48  
49

50  
51  
52 Little is known about the potential causal mechanisms between depression and subsequent  
53  
54 IPV. However, women who are depressed may experience symptoms (e.g. lethargy and  
55  
56

1  
2  
3 withdrawal) that impact their capacity for engaging in self-care behaviours including help-  
4 seeking and contact with health care providers that could enable them to extricate themselves  
5 from the relationship. It is also plausible that earlier, perhaps unmeasured experiences of  
6 violence, such as childhood sexual abuse and trauma are causing depression and later IPV, or  
7 that depression is mediating the relationship between childhood sexual abuse and later IPV. A  
8 path analysis with cross-sectional data supports this hypothesis<sup>60</sup>, but few longitudinal  
9 studies have explored these relationships.  
10  
11  
12  
13  
14  
15  
16  
17  
18  
19

20 Only two studies on alcohol use controlled for childhood sexual abuse and one controlled for  
21 the partner's level of alcohol use, both of which are potential causes of women's alcohol use.  
22 It has been suggested that women who drink heavily are more likely to have a partner who  
23 drinks heavily, which can increase their risk of IPV because heavy alcohol use by men is  
24 associated with IPV perpetration.<sup>61</sup> This can occur because people tend to choose a partner  
25 with similar drinking patterns to themselves or through the influence of their partner's  
26 drinking patterns and expectations.<sup>62</sup> Research also suggests that the partner's or the woman's  
27 drinking may fuel conflict in the relationship. A nationally representative study from the US  
28 found that couples with similar drinking patterns (e.g. both abstinent or both binge drinkers)  
29 were less likely to experience IPV in their relationship compared to those with discordant  
30 drinking habits.<sup>63</sup> This implies that relationship conflict may result in IPV, as opposed to  
31 alcohol use alone because high alcohol use would be more predictive than discordant use.  
32 Alcohol use was measured in a variety of ways with most assessing binge drinking or heavy  
33 drinking and only two studies measuring alcohol dependence. Although heavy alcohol  
34 consumption increases the risk for disease, injury and premature death<sup>64 65</sup> the adverse  
35 consequences may vary considerably between people who sporadically drink heavily and  
36 those who develop an alcohol use disorder. Although the evidence points to a bi-directional  
37  
38  
39  
40  
41  
42  
43  
44  
45  
46  
47  
48  
49  
50  
51  
52  
53  
54  
55  
56  
57  
58  
59  
60

1  
2  
3 relationship between IPV and hard drug use and IPV and marijuana use there were few  
4  
5 estimates. Women may self-medicate with alcohol, tobacco or drugs in an attempt to cope  
6  
7 with the trauma and stress of living in an abusive relationship, which in themselves are  
8  
9 important risk factors for poor health. However, alcohol or substance abuse by the abuser or  
10  
11 the woman has also been identified as a trigger to violent episodes or a factor that contributes  
12  
13 to more severe violence.<sup>66</sup> The evidence for the association between recent IPV and STIs is  
14  
15 uncertain.

16  
17  
18  
19  
20 It was not possible to examine whether the duration or severity of the violence influenced the  
21  
22 relationship between IPV and health. Studies conceptualised violence as physical, sexual,  
23  
24 verbal, or emotional (or psychological), with most using a combination of types of violence.  
25  
26 Only one study provided estimates of minor and severe violence. Studies reported the time  
27  
28 frame in which the violence occurred, but not the duration.

29  
30  
31  
32  
33 The majority of the studies were from high income countries, most notably the USA and only  
34  
35 seven studies were from middle income countries where it is known that the prevalence of  
36  
37 past year IPV is higher. Six of the studies were of adolescents, again mostly in high income  
38  
39 countries, where these were likely to be dating relationships with no cohabitation. One study  
40  
41 included young girls and women. Experiences of IPV in adult and adolescent relationships  
42  
43 may be qualitatively different, in that there is a lower likelihood of experiencing systematic  
44  
45 and chronic violence in dating relationships.<sup>67</sup> About a third of the studies were drawn from  
46  
47 clinical settings, schools or were taken from sub-populations and therefore subject to bias  
48  
49 (e.g. HIV positive sex workers, women with depressive symptoms and women on methadone  
50  
51 maintenance). More population-based cohort studies are needed in order to generalise the  
52  
53 findings. Most studies measured physical violence and some modelled exposure to physical  
54  
55  
56  
57  
58  
59  
60

1  
2  
3 and sexual and other forms of violence separately. However, other forms of violence (e.g.  
4 emotional abuse, threats) may also associated with some of the health outcomes. Most studies  
5 constructed the reference categories for IPV as binary opposites, meaning that some  
6 participants in the reference group may have been exposed to other forms of IPV that were  
7 not measured or modelled. This can bias the effect estimates towards the null and  
8 underestimate the magnitude of the association between recent IPV and health outcomes.  
9 Some studies included only women who were in a relationship for all waves of data  
10 collection. However, research shows that the prevalence of IPV is higher among women who  
11 are no longer with abuser compared to those currently in a relationship<sup>68</sup> and excluding these  
12 women may dilute the association between IPV and health outcomes.  
13  
14  
15  
16  
17  
18  
19  
20  
21  
22  
23  
24  
25

## 26 **Implications**

27  
28 The evidence on the association between exposure to IPV and mental and physical health  
29 outcomes has important implications for the delivery of interventions and services. IPV  
30 against women has received increasing attention by public health experts globally.<sup>2</sup> The  
31 results of this review indicates that health care providers and specialist IPV organisations  
32 should be aware of the bidirectional relationship between recent IPV and depression. Women  
33 with depression may be at risk of IPV, including IPV that is ongoing and services,  
34 particularly health care, should be trained to enquire about IPV experiences and respond and  
35 refer appropriately. Little is known about what pattern of exposure to IPV is more strongly  
36 associated with different health outcomes. In order to establish these connections,  
37 longitudinal studies of IPV and health are needed that distinguish recent violence with no  
38 prior history, from recent violence that is part of ongoing abuse, and historical violence that  
39 no longer occurs. Other factors that are known to mediate the relationship such as the  
40 duration and severity of IPV, childhood physical and sexual abuse, poverty related stress and  
41  
42  
43  
44  
45  
46  
47  
48  
49  
50  
51  
52  
53  
54  
55  
56  
57  
58  
59  
60

1  
2  
3 risk behaviours such as alcohol and substance abuse should be carefully considered in  
4  
5 analyses.  
6  
7  
8

9 **Figure 1: Flow of studies through review**

10  
11 **Figure 2: Forest plot estimates of the association between IPV and depression**

12  
13 **Figure 3: Forest plot estimates of the association between IPV and alcohol use, hard**  
14  
15 **drug use, marijuana use and STIs**  
16  
17  
18  
19  
20  
21  
22  
23  
24  
25  
26  
27  
28  
29  
30  
31  
32  
33  
34  
35  
36  
37  
38  
39  
40  
41  
42  
43  
44  
45  
46  
47  
48  
49  
50  
51  
52  
53  
54  
55  
56  
57  
58  
59  
60

1  
2  
3 **Declarations**

4 **Ethics approval**

5  
6 Not applicable  
7

8 **Consent for publication**

9  
10 Not applicable  
11

12 **Availability of data and material**

13  
14 All data generated or analysed during this study are included in this published article [and its  
15  
16 supplementary files].  
17

18 **Competing interests**

19  
20  
21 The authors declare that they have no competing interests.  
22

23 **Funding**

24  
25 The study received funding from Wellspring. Wellspring did not contribute to study design,  
26  
27 data collection and analysis, interpretation of data or writing the manuscript.  
28

29 **Authors' contributions**

30  
31 Conceived and designed the study: LJB KD. Data collection: LJB. Analysed the data: LJB,  
32  
33 MR, KD. Wrote the first draft of the manuscript: LJB. Contributed to the writing of the  
34  
35 manuscript: LJB CW KD MR. Agreed with manuscript results and conclusions: LJB CW KD  
36  
37 MR.  
38  
39

40 **Acknowledgements**

41  
42 None  
43  
44  
45  
46  
47  
48  
49  
50  
51  
52  
53  
54  
55  
56  
57  
58  
59  
60

## References

1. Devries KM, Mak JY, Garcia-Moreno C, et al. Global health. The global prevalence of intimate partner violence against women. *Science* 2013;340:1527-8. doi: 10.1126/science.1240937
2. World Health Organization. Global and regional estimates of violence against women: prevalence and health effects of intimate partner violence and non-partner sexual violence. Geneva, Switzerland: World Health Organization, 2013.
3. Mokdad AH, Hosseini Forouzanfar M, Daoud F, et al. Global burden of diseases, injuries, and risk factors for young people's health during 1990–2013: a systematic analysis for the Global Burden of Disease Study 2013. *Lancet* 2016;387:2383-401.
4. Devries KM, Mak JY, Bacchus LJ, et al. Intimate partner violence and incident depressive symptoms and suicide attempts: a systematic review of longitudinal studies. *PLoS Med* 2013;10:e1001439. doi: 10.1371/journal.pmed.1001439
5. Devries KM, Child JC, Bacchus LJ, et al. Intimate partner violence victimization and alcohol consumption in women: a systematic review and meta-analysis. *Addiction* 2014;109:379-91. doi: 10.1111/add.12393
6. Hindin MJ, Kishor S, Ansam DL. Intimate Partner Violence among Couples in 10 DHS Countries: Predictors and Health Outcomes . DHS Analytical studies No.18. Calverton, Maryland, USA, 2008.
7. World Health Organization. WHO multi-country study on women's health and domestic violence against women. Geneva, Switzerland, 2005.
8. Abramsky T, Devries K, Kiss L, et al. Findings from the SASA! Study: a cluster randomized controlled trial to assess the impact of a community mobilization intervention to prevent violence against women and reduce HIV risk in Kampala, Uganda. *BMC Med* 2014;12:122. doi: 10.1186/s12916-014-0122-5
9. Kim JC, Watts CH, Hargreaves JR, et al. Understanding the impact of a microfinance-based intervention on women's empowerment and the reduction of intimate partner violence in South Africa. *Am J Public Health* 2007 97:1794-802. doi: 10.2105/AJPH.2006.095521
10. Wagman JA, Gray RH, Campbell JC, et al. Effectiveness of an integrated intimate partner violence and HIV prevention intervention in Rakai, Uganda: analysis of an intervention in an existing cluster randomised cohort. *Lancet Glob Health* 2015;3:e23-33. doi: [http://dx.doi.org/10.1016/S2214-109X\(14\)70344-4](http://dx.doi.org/10.1016/S2214-109X(14)70344-4)
11. Glymour MM, Weuve J, Berkman LF, et al. When is baseline adjustment useful in analyses of change? An example with education and cognitive change. *Am J Epidemiol* 2005;162:267–78.
12. Higgins J, Thompson SG. Quantifying heterogeneity in a meta-analysis. *Statistics in Medicine* 2002;21(11):1539–58. doi: Higgins J, Thompson SG (2002) Quantifying heterogeneity in a meta-analysis. *Stat Med* 21: 1539–1558.
13. Chuang CH, Cattoi AL, McCall-Hosenfeld JS, et al. Longitudinal association of intimate partner violence and depressive symptoms. *Mental Health Fam Med* 2012;9:107-14.
14. Gilbert L, El-Bassel N, Chang M, et al. Substance use and partner violence among urban women seeking emergency care. *Psychol Addict Behav* 2012;26:226-35. doi: <http://dx.doi.org/10.1037/a0025869>
15. Keiley MK, Keller PS, El-Sheikh M. Effects of physical and verbal aggression, depression, and anxiety on drinking behavior of married partners: A prospective and retrospective longitudinal examination. *Aggress Behav* 2009;35:296-312. doi: <http://dx.doi.org/10.1002/ab.20310>



16. Nowotny KM, Graves JL. Substance use and intimate partner violence victimization among white, African American, and Latina women. *J Interpers Violence* 2013;28:3301-18. doi: <http://dx.doi.org/10.1177/0886260513496903>
17. Leher JA, Buka G, Gortmaker S, et al. Depressive symptomatology as predictor of exposure to intimate partner violence among US female adolescents and young adults. *Arch Pediatr Adolesc Med* 2006;160:270-76.
18. Teitelman AM, Ratcliffe SJ, Dichter ME, et al. Recent and past intimate partner abuse and HIV risk among young women. *Journal Obstet Gynecol Neonatal Nurs.* 2008;37:219-27. doi: <http://dx.doi.org/10.1111/j.1552-6909.2008.00231.x>
19. Zlotnick C, Johnson DM, Kohn R. Intimate Partner Violence and Long-Term Psychosocial Functioning in a National Sample of American Women. *J Interpers Violence* 2006;21:262-75. doi: <http://dx.doi.org/10.1177/0886260505282564>
20. El-Bassel N, Gilbert L, Wu E, et al. HIV and intimate partner violence among methadone-maintained women in New York City. *Soc Sci Med* 2005;61:171-83. doi: <http://dx.doi.org/10.1016/j.socscimed.2004.11.035>
21. El-Bassel N, Gilbert L, Wu E, et al. Relationship between drug abuse and intimate partner violence: a longitudinal study among women receiving methadone. *Am J Pub Health* 2005;95:1493-94. doi: <http://dx.doi.org/10.2105/AJPH.2005.069195>
22. Roberts TA, Klein J. Intimate partner abuse and high-risk behavior in adolescents. *Arch Pediatr Adolesc Med* 2003;157:375-80.
23. Newcomb MD, Vargas Carmona J. Adult Trauma and HIV Status Among Latinas: Effects Upon Psychological Adjustment and Substance Use. *AIDS Beh* 2004;8:417-28.
24. Foshee VA, Benefield TS, Ennett ST, et al. Longitudinal predictors of serious physical and sexual dating violence victimization during adolescence. *Prev Med* 2004;39:1007-16. doi: 10.1016/j.ypmed.2004.04.014
25. Suglia SF, Duarte CS, Sandel MT. Housing quality, housing instability, and maternal mental health. *J Urban Health.* 2011;88:1105-16.
26. Levendosky AA, Bogat GA, Huth-Bocks AC, et al. The influence of domestic violence on the stability of attachment from infancy to preschool. *J Clin Child Adolesc Psychol* 2011;40:398-410. doi: <http://dx.doi.org/10.1037/a0024561>
27. Testa M, Leonard KE. The impact of marital aggression on women's psychological and marital functioning in a newlywed sample. *J Fam Viol* 2001;16:115-30.
28. Testa M, Livingston JA, Leonard KE. Women's substance use and experiences of intimate partner violence: A longitudinal investigation among a community sample. *J Addict Behav* 2003;28:1649-64. doi: <http://dx.doi.org/10.1016/j.addbeh.2003.08.040>
29. Marsh Buzy W. Adolescent girls' alcohol use as a risk factor for relationship violence. *J Res Adolesc* 2004;14:449-70.
30. Valentine JM, Rodriguez MA, Lapeyrouse LM, et al. Recent intimate partner violence as a prenatal predictor of maternal depression in the first year postpartum among Latinas. *Arch Womens Ment Health* 2011;14:135-43. doi: <http://dx.doi.org/10.1007/s00737-010-0191-1>
31. Davidson SK, Dowrick CF, Gunn JM. Impact of functional and structural social relationships on two year depression outcomes: a multivariate analysis. *J Affect Disord* 2016;193:274-81.
32. Taft AJ, Watson LF. Depression and termination of pregnancy (induced abortion) in a national cohort of young Australian women: the confounding effect of women's experience of violence. *BMC Public Health* 2008;8:75. doi: <http://dx.doi.org/10.1186/1471-2458-8-75>

- 1  
2  
3 33. Woolhouse H, Gartland D, Mensah F, et al. Maternal depression from early pregnancy to  
4 4 years postpartum in a prospective pregnancy cohort study: implications for primary  
5 health care. *BJOG* 2014;122:312-21. doi: <http://dx.doi.org/10.1111/1471-0528.12837>
- 6 34. Boden JM, Fergusson DM, Horwood L. Alcohol misuse and relationship breakdown:  
7 Findings from a longitudinal birth cohort. *Drug Alcohol Depend* 2013;133:115-20.  
8 doi: <http://dx.doi.org/10.1016/j.drugalcdep.2013.05.023>
- 9 35. Gao W, Paterson J, Abbott M, et al. Impact of current and past intimate partner violence  
10 on maternal mental health and behaviour at 2 years after childbirth: Evidence from the  
11 Pacific Islands Families Study. *Aust N Z J Psychiatry* 2010;44:174-82. doi:  
12 <http://dx.doi.org/10.3109/00048670903487126>
- 13 36. Jewkes RK, Dunkle K, Nduna M, et al. Intimate partner violence, relationship power  
14 inequity, and incidence of HIV infection in young women in South Africa: A cohort  
15 study. *Lancet* 2010;376:41-48. doi: <http://dx.doi.org/10.1016/S0140-6736%2810%2960548-X>
- 17 37. Nduna M, Jewkes RK, Dunkle KL, et al. Associations between depressive symptoms,  
18 sexual behaviour and relationship characteristics: a prospective cohort study of young  
19 women and men in the Eastern Cape, South Africa. *J Int AIDS Soc* 2010;13:44. doi:  
20 <http://dx.doi.org/10.1186/1758-2652-13-44>
- 21 38. Tsai AC, Tomlinson M, Comulada WS, et al. Intimate partner violence and depression  
22 symptom severity among South African women during pregnancy and postpartum:  
23 population-based prospective cohort study. *PLoS Medicine* 2016;13:e1001943. doi:  
24 10.1371/journal.pmed1001943
- 25 39. Chowdhary N, Patel V. The effect of spousal violence on women's health: findings from  
26 the Stree Arogya Shodh in Goa, India. *J Postgrad Med* 2008;54:306-12.
- 27 40. Patel V, Rodrigues M, DeSouza N. Gender, poverty and postnatal depression: a study of  
28 mothers in Goa, India. *Am J Psychiatry* 2002;159:43-46.
- 29 41. Algeria M, Vera M, Shrout P, et al. Understanding hard-core drug use among urban  
30 Puerto Rican women in high-risk neighborhoods. *J Addict Behav* 2004;29:643-64.
- 31 42. Escriba-Aguir V, Royo-Marques M, Artazcoz L, et al. Longitudinal study of depression  
32 and health status in pregnant women: Incidence, course and predictive factors. *Eur*  
33 *Arch Psychiatry Clin Neurosci* 2013;263:143-51. doi:  
34 <http://dx.doi.org/10.1007/s00406-012-0336-5>
- 35 43. Kim J, Lee J. Prospective study on the reciprocal relationship between intimate partner  
36 violence and depression among women in Korea. *Soc Sci Med* 2013;99:42-48. doi:  
37 <http://dx.doi.org/10.1016/j.socscimed.2013.10.014>
- 38 44. Salazar M, Valladares E, Ohman A, et al. Ending intimate partner violence after  
39 pregnancy: findings from a community-based longitudinal study in Nicaragua. *BMC*  
40 *Public Health* 2009;9:350. doi: <http://dx.doi.org/10.1186/1471-2458-9-350>
- 41 45. Wilson KS, Deya R, Yuhas K, et al. A prospective cohort study of intimate partner  
42 violence and unprotected sex in HIV-positive female sex workers in Mombasa,  
43 Kenya. *J AIDS Behav* 2016;20:2054-64.
- 44 46. Kita S, Haruna M, Matsuzaki M, et al. Associations between intimate partner violence  
45 (IPV) during pregnancy, mother-to-infant bonding failure, and postnatal depressive  
46 symptoms. *Archives of Women's Mental Health* 2016;19:623-34.
- 47 47. Flach C, Leese M, Heron J, et al. Antenatal domestic violence, maternal mental health  
48 and subsequent child behaviour: a cohort study. *BJOG* 2011;118:1383-91. doi:  
49 <http://dx.doi.org/10.1111/j.1471-0528.2011.03040.x>
- 50 48. Rogathi JJ, Manongi R, Mushi D, et al. Postpartum depression among women who have  
51 experienced intimate partner violence: a prospective cohort study at Moshi, Tanzania.  
52 *J Affect Disord* 2017;218:238-45.
- 53  
54  
55  
56  
57  
58  
59  
60

- 1  
2  
3 49. Boden JM, Fergusson DM, Horwood L. Alcohol misuse and violent behavior: Findings  
4 from a 30-year longitudinal study. *Drug Alcohol Depend* 2012;122:135-41. doi:  
5 <http://dx.doi.org/10.1016/j.drugalcdep.2011.09.023>
- 6 50. Teitelman AM, Rratcliffe SJ, Dichter ME, et al. Recent and Past Intimate Partner Abuse  
7 and HIV Risk Among Young Women. *Obstet Gynecol Neonatal Nurs* 2008;37:219-  
8 27.
- 9 51. Stene LE, Jacobsen GW, Dyb G, et al. Intimate partner violence and cardiovascular risk  
10 in women: A population-based cohort study. *J Womens Health* 2013;22:250-58. doi:  
11 <http://dx.doi.org/10.1089/jwh.2012.3920>
- 12 52. Clark CJ, Spencer RA, Everson-Rose SA, et al. Dating violence, childhood maltreatment,  
13 and BMI from adolescence to young adulthood. *Pediatrics* 2014;134:678-85. doi:  
14 <http://dx.doi.org/10.1542/peds.2014-1179>
- 15 53. Clark CJ, Alonso A, Everson-Rose SA, et al. Intimate partner violence in late adolescence  
16 and young adulthood and subsequent cardiovascular risk in adulthood. *Prev Med*  
17 2016;87:132-37. doi: 10.1016/j.ypmed.2016.02.031
- 18 54. Clark CJ, Everson-Rose SA, Alonso A, et al. Effect of partner violence in adolescence  
19 and young adulthood on blood pressure and incident hypertension. *PLoS ONE*  
20 2014;9:e92204. doi: <http://dx.doi.org/10.1371/journal.pone.0092204>
- 21 55. Miller AH. Neuroendocrine and immune system interactions in stress and depression.  
22 *Psychiatr Clin North Am* 1998;21:443-63.
- 23 56. Howard LM, Oram S, Galley H, et al. Domestic violence and perinatal mental disorders:  
24 a systematic review and meta-analysis. *PLoS Med* 2013;10:e1001452. doi:  
25 <http://dx.doi.org/10.1371/journal.pmed.1001452>
- 26 57. Ludermir AB, Lewis G, Valongueiro SA, et al. Violence against women by their intimate  
27 partner during pregnancy and postnatal depression: a prospective cohort study. *Lancet*  
28 2010;376:903-10. doi: [http://dx.doi.org/10.1016/S0140-6736\(10\)60887-2](http://dx.doi.org/10.1016/S0140-6736(10)60887-2)
- 29 58. Halim N, Beard J, Mesic A, et al. Intimate partner violence during pregnancy and  
30 perinatal mental disorders in low and lower middle income countries: a systematic  
31 review of literature 1990-2017. *Clin Psychol Rev* 2017;
- 32 59. Boden JM, Fergusson DM. Alcohol and depression. *Addiction* 2011;106:906-14. doi:  
33 10.1111/j.1360-0443.2010.03351.x
- 34 60. Machisa MT, Christophides N, Jewkes R. Mental ill health in structural pathways to  
35 women's experiences of intimate partner violence. *PLOS One* 2017;12:0175240.
- 36 61. Foran HM, O'Leary KD. Alcohol and intimate partner violence: A meta-analytic review.  
37 *Clin Psychol Rev* 28 2008;28:1222-34.
- 38 62. Leonard KE, Eiden RD. Marital and family processes in the context of alcohol use and  
39 alcohol disorders. *Annu Rev Clin Psychol* 2007;3:285-310.
- 40 63. Leadley K, Clark C, R. C. Couples' drinking patterns, intimate partner violence, and  
41 alcohol-related partnership problems. *J Subst Abuse* 2000;11:253-63.
- 42 64. Barbosa C, Taylor B, Godfrey C, et al. Modelling lifetime QALYs and health care costs  
43 from different drinking patterns over time: a Markov model. *Int J Methods Psychiatr*  
44 *Res* 2010;19:97-109.
- 45 65. Room R, Babor T, Rehm J. Alcohol and public health. *Lancet HIV* 2005;365:519-30.
- 46 66. Campbell JC. Health consequences of intimate partner violence. *Lancet* 2002;359:1331-  
47 36.
- 48 67. Johnson MP. Patriarchal terrorism and common couple violence: two forms of violence  
49 against women. *J Marriage Fam* 1995;57:283-94.
- 50 68. Nyamayemombe C, Mishra V, Rusakaniko S, et al. The association between violence  
51 against women and hiv: evidence from a national population-based survey in  
52 Zimbabwe. Calverton (Maryland): ICF Macro., 2010.
- 53  
54  
55  
56  
57  
58  
59  
60

Figure 1: Flow of studies through the review

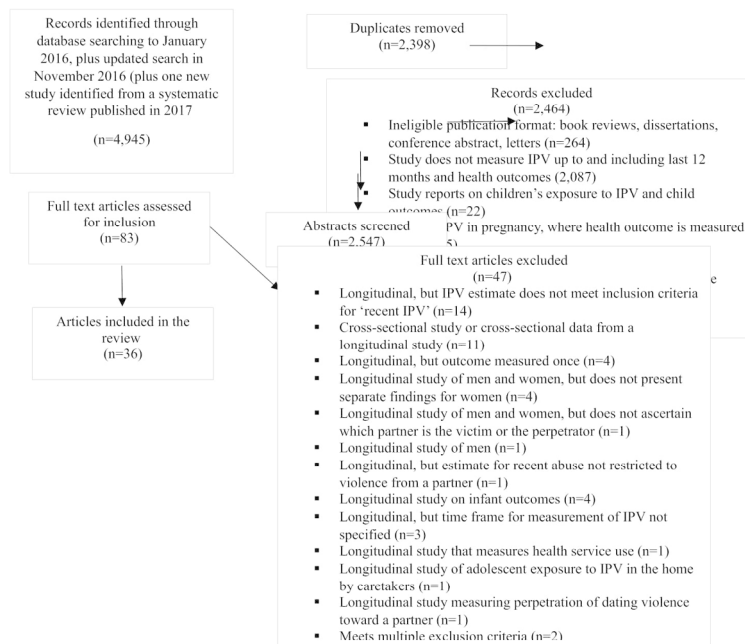

Figure 1: Flow of studies through review

583x825mm (72 x 72 DPI)

Figure 2: Forest plot estimates of the association between IPV and depression

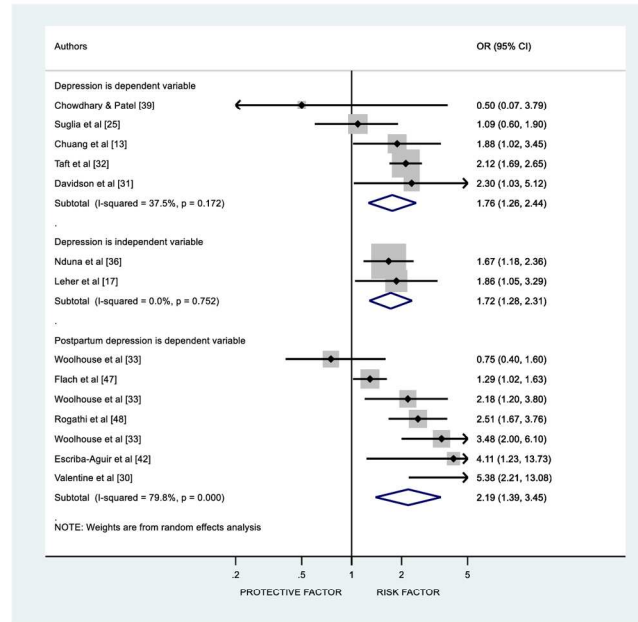

Notes: Woolhouse estimates are based on different sub-samples and are mutually exclusive. Meta-analysis with depression as the dependent variable was also undertaken excluding the Chowdhary study, but it did not materially change the overall pooled estimate (OR=1.83; 95% CI 1.35-2.49;  $I^2 = 35.1\%$ ,  $p=0.202$ )

Figure 2: Forest plot estimates of the association between IPV and depression

210x297mm (200 x 200 DPI)

**Figure 3: Forest plot estimates of the association between IPV and alcohol use, hard drug use, marijuana use and STIs**

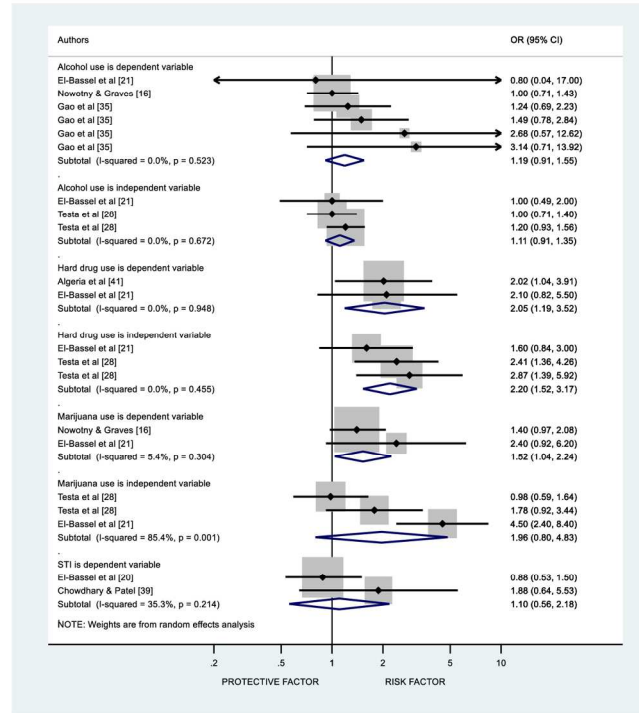

Note: Estimates from Gao and Testa are based on different sub-samples and are mutually exclusive

Figure 3: Forest plot estimates of the association between IPV and alcohol use, hard drug use, marijuana use and STIs

210x297mm (200 x 200 DPI)

## Appendix 1

### Search Strategy from Medline

1. domestic violence/ or spouse abuse/
2. Battered Women/
3. (spous\* abuse or battered wom\*n or intimate partner violence or intimate partner abuse or dating violence or domestic abuse).mp. [mp=title, abstract, original title, name of substance word, subject heading word, keyword heading word, protocol supplementary concept word, rare disease supplementary concept word, unique identifier]
4. (intimate adj4 partner adj4 violence).tw.
5. (intimate adj4 partner adj4 abuse).tw.
6. ((partner or relationship or wom\$n or domestic or spous\*) adj4 (abus\* or violen\* victimi\* or batter\*)).mp. [mp=title, abstract, original title, name of substance word, subject heading word, keyword heading word, protocol supplementary concept word, rare disease supplementary concept word, unique identifier]
7. Rape/
8. sexual violence.tw.
9. sexual abuse.tw.
10. rape.tw.
11. cohort studies/ or follow-up studies/ or longitudinal studies/ or "national longitudinal study of adolescent health"/ or prospective studies/
12. longitudinal stud\*.tw.
13. cohort stud\*.tw.
14. panel stud\*.tw.
15. follow up stud\*.tw.
16. prospective stud\*.tw.
17. longitudinal analysis.tw.
18. (longitudinal adj3 analysis).tw.
19. cohort analysis.tw.
20. (cohort adj3 analysis).tw.
21. panel analysis.tw.
22. (panel adj3 analysis).tw.
23. time series.tw.
24. (longitudinal adj3 stud\*).tw.
25. (cohort adj3 stud\*).tw.
26. (panel adj3 stud\*).tw.
27. (follow up adj3 stud\*).tw.
28. (prospective adj3 stud\*).tw.
29. letter.pt.

1  
2  
3 30. editorial.pt.  
4

5 31. comment.pt.  
6

7 32. 1 or 2 or 3 or 4 or 5 or 6 or 7 or 8 or 9 or 10  
8

9 33. 11 or 12 or 13 or 14 or 15 or 16 or 17 or 18 or 19 or 20 or 21 or 22 or 23 or 24 or 25 or 26  
10 or 27 or 28

11 34. 29 or 30 or 31  
12

13 35. 33 not 34  
14

15 **36. 32 and 35 (2,536)**  
16  
17  
18  
19  
20  
21  
22  
23  
24  
25  
26  
27  
28  
29  
30  
31  
32  
33  
34  
35  
36  
37  
38  
39  
40  
41  
42  
43  
44  
45  
46  
47  
48  
49  
50  
51  
52  
53  
54  
55  
56  
57  
58  
59  
60

For peer review only



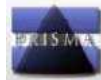

# PRISMA 2009 Checklist

| Section/topic                      | #  | Checklist item                                                                                                                                                                                                                                                                                              | Reported on page # |
|------------------------------------|----|-------------------------------------------------------------------------------------------------------------------------------------------------------------------------------------------------------------------------------------------------------------------------------------------------------------|--------------------|
| <b>TITLE</b>                       |    |                                                                                                                                                                                                                                                                                                             |                    |
| Title                              | 1  | Identify the report as a systematic review, meta-analysis, or both.                                                                                                                                                                                                                                         | 1                  |
| <b>ABSTRACT</b>                    |    |                                                                                                                                                                                                                                                                                                             |                    |
| Structured summary                 | 2  | Provide a structured summary including, as applicable: background; objectives; data sources; study eligibility criteria, participants, and interventions; study appraisal and synthesis methods; results; limitations; conclusions and implications of key findings; systematic review registration number. | 2-3                |
| <b>INTRODUCTION</b>                |    |                                                                                                                                                                                                                                                                                                             |                    |
| Rationale                          | 3  | Describe the rationale for the review in the context of what is already known.                                                                                                                                                                                                                              | 4-5                |
| Objectives                         | 4  | Provide an explicit statement of questions being addressed with reference to participants, interventions, comparisons, outcomes, and study design (PICOS).                                                                                                                                                  | 5                  |
| <b>METHODS</b>                     |    |                                                                                                                                                                                                                                                                                                             |                    |
| Protocol and registration          | 5  | Indicate if a review protocol exists, if and where it can be accessed (e.g., Web address), and, if available, provide registration information including registration number.                                                                                                                               | 5                  |
| Eligibility criteria               | 6  | Specify study characteristics (e.g., PICOS, length of follow-up) and report characteristics (e.g., years considered, language, publication status) used as criteria for eligibility, giving rationale.                                                                                                      | 6                  |
| Information sources                | 7  | Describe all information sources (e.g., databases with dates of coverage, contact with study authors to identify additional studies) in the search and date last searched.                                                                                                                                  | 6                  |
| Search                             | 8  | Present full electronic search strategy for at least one database, including any limits used, such that it could be repeated.                                                                                                                                                                               | 28                 |
| Study selection                    | 9  | State the process for selecting studies (i.e., screening, eligibility, included in systematic review, and, if applicable, included in the meta-analysis).                                                                                                                                                   | 6-7                |
| Data collection process            | 10 | Describe method of data extraction from reports (e.g., piloted forms, independently, in duplicate) and any processes for obtaining and confirming data from investigators.                                                                                                                                  | 7                  |
| Data items                         | 11 | List and define all variables for which data were sought (e.g., PICOS, funding sources) and any assumptions and simplifications made.                                                                                                                                                                       | 7                  |
| Risk of bias in individual studies | 12 | Describe methods used for assessing risk of bias of individual studies (including specification of whether this was done at the study or outcome level), and how this information is to be used in any data synthesis.                                                                                      | 7                  |
| Summary measures                   | 13 | State the principal summary measures (e.g., risk ratio, difference in means).                                                                                                                                                                                                                               | 8-9                |
| Synthesis of results               | 14 | Describe the methods of handling data and combining results of studies, if done, including measures of consistency (e.g., $I^2$ ) for each meta-analysis.                                                                                                                                                   | 8-9                |

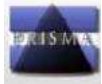

# PRISMA 2009 Checklist

Page 1 of 2

| Section/topic                 | #  | Checklist item                                                                                                                                                                                           | Reported on page #     |
|-------------------------------|----|----------------------------------------------------------------------------------------------------------------------------------------------------------------------------------------------------------|------------------------|
| Risk of bias across studies   | 15 | Specify any assessment of risk of bias that may affect the cumulative evidence (e.g., publication bias, selective reporting within studies).                                                             | 3 & 23                 |
| Additional analyses           | 16 | Describe methods of additional analyses (e.g., sensitivity or subgroup analyses, meta-regression), if done, indicating which were pre-specified.                                                         | NA                     |
| <b>RESULTS</b>                |    |                                                                                                                                                                                                          |                        |
| Study selection               | 17 | Give numbers of studies screened, assessed for eligibility, and included in the review, with reasons for exclusions at each stage, ideally with a flow diagram.                                          | 7 and in Figure 1      |
| Study characteristics         | 18 | For each study, present characteristics for which data were extracted (e.g., study size, PICOS, follow-up period) and provide the citations.                                                             | Table 2 p.30 and 12-18 |
| Risk of bias within studies   | 19 | Present data on risk of bias of each study and, if available, any outcome level assessment (see item 12).                                                                                                | 12-18                  |
| Results of individual studies | 20 | For all outcomes considered (benefits or harms), present, for each study: (a) simple summary data for each intervention group (b) effect estimates and confidence intervals, ideally with a forest plot. | 12-18                  |
| Synthesis of results          | 21 | Present results of each meta-analysis done, including confidence intervals and measures of consistency.                                                                                                  | 12-18                  |
| Risk of bias across studies   | 22 | Present results of any assessment of risk of bias across studies (see Item 15).                                                                                                                          | 3 & 23                 |
| Additional analysis           | 23 | Give results of additional analyses, if done (e.g., sensitivity or subgroup analyses, meta-regression [see Item 16]).                                                                                    | NA                     |
| <b>DISCUSSION</b>             |    |                                                                                                                                                                                                          |                        |
| Summary of evidence           | 24 | Summarize the main findings including the strength of evidence for each main outcome; consider their relevance to key groups (e.g., healthcare providers, users, and policy makers).                     | 20-22                  |
| Limitations                   | 25 | Discuss limitations at study and outcome level (e.g., risk of bias), and at review-level (e.g., incomplete retrieval of identified research, reporting bias).                                            | 23-26                  |
| Conclusions                   | 26 | Provide a general interpretation of the results in the context of other evidence, and implications for future research.                                                                                  | 26-27                  |
| <b>FUNDING</b>                |    |                                                                                                                                                                                                          |                        |
| Funding                       | 27 | Describe sources of funding for the systematic review and other support (e.g., supply of data); role of funders for the systematic review.                                                               | 47                     |

From: Moher D, Liberati A, Tetzlaff J, Altman DG, The PRISMA Group (2009). Preferred Reporting Items for Systematic Reviews and Meta-Analyses: The PRISMA Statement. PLoS Med 6(7): e1000097. doi:10.1371/journal.pmed1000097

For more information, visit: [www.prisma-statement.org](http://www.prisma-statement.org)  
For peer review only - <http://bmjopen.bmj.com/site/about/guidelines.xhtml>

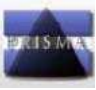

# PRISMA 2009 Checklist

- 1
- 2
- 3
- 4
- 5
- 6
- 7
- 8
- 9
- 10
- 11
- 12
- 13
- 14
- 15
- 16
- 17
- 18
- 19
- 20
- 21
- 22
- 23
- 24
- 25
- 26
- 27
- 28
- 29
- 30
- 31
- 32
- 33
- 34
- 35
- 36
- 37
- 38
- 39
- 40
- 41
- 42
- 43
- 44
- 45
- 46
- 47

For peer review only

# BMJ Open

## Recent intimate partner violence against women and health: a systematic review and meta-analysis of cohort studies

|                                 |                                                                                                                                                                                                                                                                                                                                                                                                                     |
|---------------------------------|---------------------------------------------------------------------------------------------------------------------------------------------------------------------------------------------------------------------------------------------------------------------------------------------------------------------------------------------------------------------------------------------------------------------|
| Journal:                        | <i>BMJ Open</i>                                                                                                                                                                                                                                                                                                                                                                                                     |
| Manuscript ID                   | bmjopen-2017-019995.R2                                                                                                                                                                                                                                                                                                                                                                                              |
| Article Type:                   | Research                                                                                                                                                                                                                                                                                                                                                                                                            |
| Date Submitted by the Author:   | 21-May-2018                                                                                                                                                                                                                                                                                                                                                                                                         |
| Complete List of Authors:       | Bacchus, Loraine; London School of Hygiene and Tropical Medicine, Global Health and Development<br>Ranganathan, Meghna; London School of Hygiene and Tropical Medicine, Global Health and Development<br>Watts, Charlotte; London School of Hygiene & Tropical Medicine, Global Health and Development<br>Devries, Karen; London School of Hygiene & Tropical Medicine, Department of Global Health and Development |
| <b>Primary Subject Heading</b>: | Public health                                                                                                                                                                                                                                                                                                                                                                                                       |
| Secondary Subject Heading:      | Epidemiology, Mental health                                                                                                                                                                                                                                                                                                                                                                                         |
| Keywords:                       | Depression & mood disorders < PSYCHIATRY, Substance misuse < PSYCHIATRY, PUBLIC HEALTH, MENTAL HEALTH                                                                                                                                                                                                                                                                                                               |
|                                 |                                                                                                                                                                                                                                                                                                                                                                                                                     |

SCHOLARONE™  
Manuscripts

Only

1  
2  
3 **Recent intimate partner violence against women and health: a systematic review and**  
4  
5 **meta-analysis of cohort studies**  
6  
7

8  
9 Loraine J. Bacchus<sup>1</sup>, Meghna Ranganathan<sup>1</sup>, Charlotte Watts<sup>1</sup>, Karen Devries<sup>1</sup>  
10

11 <sup>1</sup>London School of Hygiene & Tropical Medicine  
12

13 Faculty of Public Health & Policy  
14

15 Department of Global Health and Development  
16

17 London, UK  
18  
19  
20  
21

22 **Corresponding author**  
23

24 Dr Loraine J. Bacchus  
25

26 London School of Hygiene & Tropical Medicine  
27

28 15-17 Tavistock Place  
29

30 London WC1H 9SH  
31

32 E: [Loraine.Bacchus@lshtm.ac.uk](mailto:Loraine.Bacchus@lshtm.ac.uk)  
33

34 T: +44 (0)20 7958 8244  
35  
36  
37  
38

39 Keywords: Domestic violence, depression, substance related disorders, alcohol related  
40  
41 disorders  
42

43 Word count: 6,944  
44  
45  
46  
47  
48  
49  
50  
51  
52  
53  
54  
55  
56  
57  
58  
59  
60

## Abstract

**Objectives:** We reviewed cohort studies to determine the magnitude and temporal direction of the association between recent intimate partner violence (IPV) and a range of adverse health outcomes or health risk behaviours.

**Design:** Systematic review and meta-analysis.

**Methods:** Medline, EMBASE and PsycINFO were searched from the first record to November 2016. Recent IPV was defined as occurring up to and including the last 12 months; all health outcomes were eligible for inclusion. Results were combined using random effects meta-analysis.

**Results:** 35 separate cohort studies were retrieved. Eight studies showed evidence of a positive association between recent IPV and subsequent depressive symptoms, with a pooled OR from five estimates of 1.76 (95% CI 1.26-2.44,  $I^2 = 37.5%$   $p=0.172$ ). Five studies demonstrated a positive, statistically significant relationship between depressive symptoms and subsequent IPV; pooled ORs from two studies was 1.72 (95% CI 1.28-2.31,  $I^2 = 0.0%$ ,  $p=0.752$ ). Recent IPV was also associated with increased symptoms of subsequent postpartum depression in five studies (OR=2.19, 95% CI 1.39-3.45  $p=0.000$ ) although there was substantial heterogeneity. There was some evidence of a bi-directional relationship between recent IPV and hard drug use, and marijuana use although studies were limited. There was no evidence of an association between recent IPV and alcohol use or sexually transmitted infections (STIs) although there were few studies and inconsistent measurement of alcohol and STIs.

## Conclusions

Exposure to violence has significant impacts. Longitudinal studies are needed to understand the temporal relationship between recent IPV and different health issues, whilst considering the differential effects of recent versus past exposure to IPV. Improved measurement will

1  
2  
3 enable an understanding of the immediate and longer-term health needs of women exposed to  
4  
5 IPV. Health care providers and IPV organisations should be aware of the bi-directional  
6  
7 relationship between recent IPV and depressive symptoms.  
8

9 Systematic review registered on Prospero (CRD42016033372).  
10  
11  
12

### 13 **Strengths**

- 15     ▪ This is the first systematic review of cohort studies to measure the magnitude of the  
16       association and temporal direction between recent exposure to IPV and health  
17       outcomes.  
18
- 19     ▪ As the review considers a broad range of outcomes, we identified gaps in the evidence  
20       base including a need for cohort studies on recent IPV and non-communicable  
21       diseases such as cardiovascular disease hypertension and obesity, as well as  
22       posttraumatic stress disorder and anxiety disorder.  
23  
24  
25  
26  
27  
28  
29

### 30 **Limitations**

- 31     ▪ Due to the large number of abstracts retrieved and the limited timeframe for the  
32       review, we were not able to employ double screening of abstracts. However, two  
33       researchers conducted the review of full text papers, with a third reviewer the full  
34       texts of papers where there was uncertainty about their inclusion.  
35  
36  
37  
38  
39  
40
- 41     ▪ As some studies measured the outcome variable (either IPV or the health condition)  
42       continuously, it was not possible to combine all measures of effect, which limited the  
43       number of studies in the meta-analyses.  
44  
45  
46  
47
- 48     ▪ It was not possible to quantitatively assess publication bias, as too few studies were in  
49       the meta-analyses of each health condition.  
50  
51  
52  
53  
54  
55  
56  
57  
58  
59  
60

## Background

Worldwide, almost a third (30%) of all women who have been in a relationship have experienced physical and/or sexual violence by their intimate partner.<sup>1 2</sup> Women's lifetime exposure to IPV is associated with myriad health outcomes. Systematic reviews of longitudinal data, find that women who have been physically and/or sexually abused by their partner at some point in their life are twice as likely to have an abortion, twice as likely to suffer from depression, and in some regions are 1.5 times more likely to acquire HIV compared to women who have not experienced IPV.<sup>2</sup> Not surprisingly, given its high prevalence and adverse health effects, lifetime exposure to IPV is estimated to result in a high burden of disease. IPV is the second most common risk factor for disability-adjusted life years (DALY) globally in women aged 20 to 24 years.<sup>3</sup>

In our previous systematic reviews, we began to explore the relationships between 'ever' exposure to IPV and depressive symptoms and alcohol use, which revealed evidence of a bidirectional association. Devries et al. found evidence suggestive of an association between IPV and incident depressive symptoms (OR=1.97, 95% CI 1.56-2.48) as well as an association in the reverse direction between depressive symptoms and incident IPV (OR=1.93, 95% CI 1.51-2.48).<sup>4</sup> In another systematic review the authors found increased odds of alcohol use following IPV (OR=1.25, 95% CI 1.02-1.52) and increased odds of IPV following alcohol use (OR=1.27, 95% CI 1.07-1.52).<sup>5</sup>

Although available evidence finds important associations between IPV and a range of mental and physical health outcomes, the nature of the associations are not always clear. It is possible that exposure to IPV results in subsequent mental and physical health outcomes; that



1  
2  
3 different mental and physical health conditions increase risk of subsequent IPV; or that a bi-  
4  
5 directional relationship is present.  
6  
7

8  
9 Both IPV and some associated health outcomes, such as depression, anxiety and substance  
10  
11 abuse, are chronic, episodic conditions, which can occur with varying frequency over longer  
12  
13 time periods. Studies that measure lifetime exposure to IPV therefore hide the complexity of  
14  
15 the relationship between IPV and mental and physical health outcomes. This is because  
16  
17 estimates of 'ever' exposure to IPV are heterogeneous, and may include anything from past  
18  
19 year, before the past year and more distant experiences of IPV. Recent violence may lead to  
20  
21 more severe health outcomes, but this may be influenced by duration and severity, for  
22  
23 example, recent violence with no prior history versus recent violence experienced as part of  
24  
25 ongoing historical abuse.  
26  
27

28  
29  
30  
31 In the current systematic review, we build on this by closely examining the issue of  
32  
33 temporality with regard to recent exposure to IPV and a broader range of health outcomes. In  
34  
35 this paper we aim to: (i) review what health outcomes have been examined in cohort studies  
36  
37 of recent IPV ('recent' defined here as IPV experienced up to and including the last 12  
38  
39 months); (ii) quantify the magnitude of the association between IPV and different health  
40  
41 outcomes and (iii) examine the temporal direction of IPV and health outcomes.  
42  
43  
44  
45

## 46 **Methods**

47  
48 A systematic review protocol was registered on PROSPERO on the 18<sup>th</sup> March 2016  
49  
50 (CRD42016033372) and is available from  
51  
52 [http://www.crd.york.ac.uk/PROSPERO/display\\_record.php?ID=CRD42016033372](http://www.crd.york.ac.uk/PROSPERO/display_record.php?ID=CRD42016033372)  
53  
54  
55  
56  
57  
58  
59  
60

### ***Literature searches***

We searched Medline, EMBASE and PsycINFO from the first record up to January 27, 2016 (with an updated search conducted in November 2016). Terms for IPV were adapted from a previous systematic review on the prevalence of IPV and health outcomes which was conducted for the 2010 Global Burden of Disease of IPV.<sup>1</sup> Controlled vocabulary terms and text words related to longitudinal studies were used for each database. In order to ensure a wide yield of studies, terms for specific health outcomes were not included. An example search strategy appears in Appendix 1. Reference list screening was undertaken for key systematic review papers. One study was included from a systematic review on IPV and perinatal mental health disorders published in 2017 which we identified whilst this paper was under review.

### ***Inclusion criteria***

- English language publications
- Longitudinal studies reporting on female participants aged 15 and over were considered. Studies were deemed longitudinal if either the exposure or the outcome was measured on at least two occasions.
- Studies where IPV was conceptualised as the independent variable, or where IPV was the dependent variable, in order to capture any evidence of bi-directional causality.
- All author definitions of recent IPV victimisation that occurred up to and including 12 months prior.
- All author definitions of women related health outcomes that were measured on at least two occasions.

1  
2  
3 A 12-month cut-off period was chosen for recent IPV as this is the most commonly used  
4 period for prevalence estimates, it is consistent with internationally recognised IPV  
5 measures,<sup>6,7</sup> and has been used in a number of intervention studies for IPV.<sup>8-10</sup>  
6  
7  
8  
9

### 10 11 ***Screening and data extraction***

12  
13 Records were initially screened by one reviewer (LJB) and studies not meeting the inclusion  
14 criteria were removed. Full text articles were reviewed by one reviewer (LJB) and where  
15 there was uncertainty about the inclusion of an article it was referred to the senior author  
16 (KD). The final set of full-text articles were formally appraised by two reviewers (LJB and  
17 MR). Data were extracted and entered into an Excel spreadsheet by one reviewer (LJB). The  
18 study selection process including the number of studies abstracts and full texts screened with  
19 reasons for exclusion is summarised in the flowchart in Figure 1.  
20  
21  
22  
23  
24  
25  
26  
27  
28  
29  
30

### 31 ***Quality appraisal***

32  
33 The quality of each effect estimate was appraised and presented in Table 1 which correspond  
34 to the major relevant domains of potential bias in quality assessment tools. Consideration was  
35 given to whether definitions of IPV and health outcomes were based on valid, reliable  
36 measures. We considered whether studies controlled for potential confounders for two  
37 reasons. IPV and the health outcomes of interest commonly occur episodically over a period  
38 of time, and episodes of either that are incident over the study period may be a continuation  
39 of previous IPV or health outcomes. Therefore, we examined whether studies adjusted for  
40 time one levels (i.e. at the beginning of the study period) of the outcome variable.  
41  
42  
43  
44  
45  
46  
47  
48  
49

50 Additionally, IPV and the health outcomes of interest are associated with demographic  
51 characteristics and other risk factors that may explain the association between them such as  
52 childhood sexual abuse. Due to the complexity of the potential causal pathways between IPV  
53  
54  
55  
56  
57  
58  
59  
60

1  
2  
3 and the health outcomes, we did not specify a minimum set of confounders that should be  
4 adjusted for. Additionally, it has been noted that it is not always appropriate to adjust for  
5 baseline levels of an outcome variable in longitudinal studies. When exposures are associated  
6 with baseline health status, bias can arise if change in health status preceded baseline  
7 assessment or if the dependent variable measurement is unreliable or unstable.<sup>11</sup> However,  
8 we recorded whether key variables were adjusted for and examined the results in the light of  
9 these adjustments. Information was also extracted in relation to mode of administration of  
10 surveys, length of follow-up number of waves and attrition rates.  
11  
12  
13  
14  
15  
16  
17  
18  
19  
20  
21

### 22 ***Data Analysis***

23  
24 Analyses were conducted by LJB and KD using Stata 14.0. Study characteristics and quality  
25 are summarised descriptively. Studies reported a range of effect estimates (e.g. odds ratios,  
26 relative risks and correlation coefficients). Adjusted odds ratios (ORs) were extracted directly  
27 from the publications with the exception of one unadjusted OR which was calculated for a  
28 study on perceived stress which is not one of the health outcomes included in the meta-  
29 analyses. Studies measured IPV or health outcomes in heterogeneous ways, therefore the  
30 results are summarised descriptively for each health outcome. Where there were at least two  
31 estimates, random effects meta-analysis was used to calculate the pooled ORs representing  
32 associations between IPV occurring up to and including the last 12 months and various health  
33 outcomes. Higgin's  $I^2$  statistic, which describes the percentage of variability in point  
34 estimates that is due to heterogeneity rather than sampling error<sup>12</sup>, was calculated. Some  
35 studies reported multiple estimates using overlapping definitions of IPV on the same sample  
36 of participants. In order to avoid double counting participants in these studies, which can lead  
37 to falsely precise pooled estimates, preference was given to one estimate using the following  
38 algorithm implemented in the following sequence: (i) those derived from multivariate  
39  
40  
41  
42  
43  
44  
45  
46  
47  
48  
49  
50  
51  
52  
53  
54  
55  
56  
57  
58  
59  
60

1  
2  
3 analysis (ii) where the definition of IPV closely matched that of the other studies in the meta-  
4  
5 analysis (iii) where the reference group was unexposed to any violence and (iv) where the  
6  
7 estimate was most precise (i.e. the smallest confidence interval). This algorithm was applied  
8  
9 to 3 studies. Studies that provided multiple estimates, but on different sub-samples of  
10  
11 participants were included in the meta-analysis. Studies that reported other types of estimate  
12  
13 (e.g. correlations coefficients, betas, risk ratios) are documented separately.  
14  
15

### 16 17 18 ***Ethics Statement***

19  
20 All data used in this review were already in the public domain and ethical approval was not  
21  
22 required.  
23  
24

### 25 26 27 ***Patient and public involvement***

28  
29 Patients and the public were not involved in this systematic review.  
30  
31  
32  
33  
34  
35  
36  
37  
38  
39  
40  
41  
42  
43  
44  
45  
46  
47  
48  
49  
50  
51  
52  
53  
54  
55  
56  
57  
58  
59  
60

**Table 1. Quality assessment of 36 papers reporting on 35 studies included in the review and effect estimates**

| Study, Participants, Country                     | Length of Follow-up; Number of Waves | Attrition at Last Wave | IPV Measure and Timeframe                                              | Health Outcome Measure and Timeframe             | Adjusted for Time 1 Dependent Variable <sup>a</sup>              | Adjusted for CSA | Other Variables Adjusted For                                                                                                                                                                                                                | Mode of Administration                         | Effect Estimate               |
|--------------------------------------------------|--------------------------------------|------------------------|------------------------------------------------------------------------|--------------------------------------------------|------------------------------------------------------------------|------------------|---------------------------------------------------------------------------------------------------------------------------------------------------------------------------------------------------------------------------------------------|------------------------------------------------|-------------------------------|
| <b>Depressive symptoms as dependent variable</b> |                                      |                        |                                                                        |                                                  |                                                                  |                  |                                                                                                                                                                                                                                             |                                                |                               |
| Chuang et al. [13]; 1,420 adult women; USA       | 2 years; 2 waves                     | 29.1%                  | Physical and/or sexual, CTS-like, last 12 months                       | Depression, CES-D, past week                     | Yes                                                              | No               | IPV; age group; race; education; marital status; income (for the step 1 regression model)                                                                                                                                                   | Telephone interview                            | aOR=1.88 (1.02-3.45)          |
| Chowdhary & Patel [39]; 1,750 adult women; India | 1 year; 3 waves                      | -                      | Physical, CT-like, last 3 months                                       | Depressive disorder, ICD-10, currently suffering | No, but analysis removes women with baseline depressive disorder | No               | Age; literacy; household per capita income                                                                                                                                                                                                  | Interviewer administered                       | aOR=0.5 (0.07-3.79)           |
| Davidson et al. [31]; 494 adult women; Australia | 2 years; 2 waves                     | 37.4%                  | Physical and/or sexual, CAS, last 12 months                            | Major Depressive Disorder, PHQ-9, past 2 weeks   | Yes                                                              | Yes              | Social function; social structure; lives alone; economic disadvantage; neuroticism; child sexual abuse; child physical abuse                                                                                                                | Self-administered                              | aOR=2.3 (1.03-5.12), p=0.04   |
| Kim & Lee [43]; 153 adult women; Korea           | 4 years; 4 waves                     | 34.2%                  | “Physical violence and/or threat of physical violence”, last 12 months | Depression, CES-D, past week                     | Yes                                                              | No               | Age; education; social support; household income; past year physical violence at time 1                                                                                                                                                     | Interviewer administered                       | Beta=-0.03, SE=0.01, p=0.004  |
| Newcomb et al. [23] 113 adult women; USA         | 1 year; 3 waves                      | 24.0%                  | Psychological and/or physical, CTS, last 6 months                      | Depression, CES-D, period not specified          | Yes                                                              | No               | Age; education; relationship status                                                                                                                                                                                                         | Interviewer administered                       | Path coefficient=0.17, p<0.05 |
| Suglia et al. [25]; 1,834 adult women; USA       | 3 years; 3 waves                     | -                      | Physical and/or sexual, CTS-like, last 12 months                       | Depression, CID1-SF, past 12 months              | Yes                                                              | No               | Age; ethnicity; education; marital status; economic hardship; IPV                                                                                                                                                                           | Interviewer administered                       | aOR=1.09 (0.6-1.9)            |
| Roberts et al. [22]; 2,206 adolescents; USA      | 1 year; 2 waves                      | -                      | Physical, CTS, last 12 months                                          | Depression, CES-D, past week                     | Yes                                                              | No               | Sociodemographic factors; highest level of abuse by a partner prior to wave 1; number of sexual partners between wave 1 and 2; time elapsed between wave 1 and wave 2; level of risk behaviour at wave 1 (alcohol use/illicit substance us) | Computer assisted personal and self- interview | Beta=0.18 (0.1-0.26) p<0.05   |

1  
2  
3  
4

| Study, Participants, Country                              | Length of Follow-up; Number of Waves | Attrition at Last Wave | IPV Measure and Timeframe                                              | Health Outcome Measure and Timeframe                  | Adjusted for Time 1 Dependent Variable <sup>a</sup> | Adjusted for CSA | Other Variables Adjusted For                                                                                                                                                                                    | Mode of administration                         | Effect Estimate             |
|-----------------------------------------------------------|--------------------------------------|------------------------|------------------------------------------------------------------------|-------------------------------------------------------|-----------------------------------------------------|------------------|-----------------------------------------------------------------------------------------------------------------------------------------------------------------------------------------------------------------|------------------------------------------------|-----------------------------|
| Taft et al. [32]; 99,683 adult women; Australia           | 4 years; 2 waves                     | -                      | Physical and/or sexual, CTS, last 12 months                            | Depression, CES-D, past week                          | Yes                                                 | No               | Depression time 1; number of children; marital status; age; education level; occupation; health insurance status; country of birth; area of residence; state of residence; Aboriginal or Torres Strait identity | Self-administered                              | aOR=2.12 (1.69-2.65)        |
| Zlotnick et al. [19] 3,104 adult women; USA               | 5 years; 2 waves                     | -                      | Physical, CTS-like, last 12 months                                     | Depression, CES-D, past week                          | Yes                                                 | No               | Age                                                                                                                                                                                                             | Self-administered and interviewer administered | Beta=6.96, p=0.003          |
| <b>Depressive symptoms – IPV as dependent variable</b>    |                                      |                        |                                                                        |                                                       |                                                     |                  |                                                                                                                                                                                                                 |                                                |                             |
| Oshee et al. 2004 [24]; 1,291 adolescents; USA            | 4-5 years; 4-5 waves                 | -                      | Sexual dating violence, CTS like, last 12 months                       | Depression symptoms “Kandel and Davis”, last 6 months | Yes                                                 | No               | Demographics; peer environment; family environment; social norms; personal competencies; depression; problem behaviour; alcohol use                                                                             | Self-administered                              | HR=1.35 (1.05-1.74)         |
| Kim & Lee [43]; 3,153 adult women; Korea                  | 4 years; 4 waves                     | 34.2%                  | “Physical violence and/or threat of physical violence”, last 12 months | Depression, CES-D, past week                          | Yes                                                 | No               | Age; education; social support; household income                                                                                                                                                                | Interviewer administered                       | Beta=3.34, SE=0.61, p<0.001 |
| Geher et al. 2006 [17]; 1,659 adolescents; USA            | 7 years; 3 waves                     | -                      | Physical, CTS-like, last 12 months                                     | Depression, CES-D, past week                          | Yes                                                 | Yes              | Age; race/ethnicity; parental education; childhood physical abuse; dating violence/forced sex                                                                                                                   | Computer assisted self- interview              | aOR=1.86 (1.05-3.29)        |
| Levendosky et al. [26] 150 adult women; USA               | 4 years; 5 waves                     | -                      | Physical and/or sexual, last 12 months, SVAWS                          | Depression, BDI, time period not specified            | No                                                  | No               | Unadjusted                                                                                                                                                                                                      | Interviewer administered                       | R=0.24, p<0.05              |
| Mduna et al. 2010 [37]; 995 women and girls; South Africa | 1 year; 2 waves                      | 22.6%                  | Physical and/or sexual, CTS-like (WHO), last 12 months                 | Depression, CES-D, past week                          | Yes                                                 | Yes              | Socio-economic status; experiences of childhood adversity; alcohol abuse; education; study design                                                                                                               | Interviewer administered                       | aOR=1.67 (1.18-2.36)        |

37  
38  
39  
40  
41  
42  
43  
44  
45  
46  
47

1  
2  
3  
4  
5  
6  
7  
8  
9  
10  
11  
12  
13  
14  
15  
16  
17  
18  
19  
20  
21  
22  
23  
24  
25  
26  
27  
28  
29  
30  
31  
32  
33  
34  
35  
36  
37  
38  
39  
40  
41  
42  
43  
44  
45  
46  
47

| Study, Participants, Country                            | Length of Follow-up; Number of Waves | Attrition at Last Wave | IPV Measure and Timeframe                                                     | Health Outcome Measure and Timeframe                                  | Adjusted for Time 1 Dependent Variable <sup>a</sup> | Adjusted for CSA | Other Variables Adjusted For                                                                                                                                                                      | Mode of administration                                              | Effect Estimate                                                                                                                                                      |
|---------------------------------------------------------|--------------------------------------|------------------------|-------------------------------------------------------------------------------|-----------------------------------------------------------------------|-----------------------------------------------------|------------------|---------------------------------------------------------------------------------------------------------------------------------------------------------------------------------------------------|---------------------------------------------------------------------|----------------------------------------------------------------------------------------------------------------------------------------------------------------------|
| <b>Postpartum depression as dependent variable</b>      |                                      |                        |                                                                               |                                                                       |                                                     |                  |                                                                                                                                                                                                   |                                                                     |                                                                                                                                                                      |
| Escriba-Aguir et al. [42]; 888 pregnant women; Spain    | 1 year; 4 waves                      | 33.5%                  | Psychological, Abuse AAS, past 12 months                                      | Postpartum depression, EPDS, past 12 months                           | Yes                                                 | No               | Sociodemographic factors (age, marital status, education, employment status, native country); negative life events                                                                                | Self-administered, interviewer administered and telephone interview | aOR=4.11 (1.23-13.73)                                                                                                                                                |
| Flach et al. [47]; 5,681 pregnant women; United Kingdom | 3.5 years; 5 waves                   | -                      | Has a partner physically hurt and/or been emotionally cruel, during pregnancy | Postnatal depression, EPDS, past 7 days (asked at 8 weeks postpartum) | Yes                                                 | No               | Paternal postnatal depressive symptoms; size of child for gestational age                                                                                                                         | Self-administered                                                   | aOR=1.29 (1.02-1.63)                                                                                                                                                 |
| Kita et al. [46]; 962 adult women; Japan                | 1 month; 2 waves                     | 26.7%                  | Physical and/or non-physical, during pregnancy, ISA                           | Postnatal depression, HADS, past 7 days                               | Yes                                                 | No               | Mother to infant bonding; age, parity                                                                                                                                                             | Self-administered                                                   | Path coefficients: Antenatal IPV and postnatal depression=0.10 (NS); Antenatal IPV and antenatal depression=0.31; Antenatal depression and postnatal depression=0.57 |
| Patel et al. [40]; 235 pregnant women; India            | 6 months; 3 waves                    | 13.0%                  | "Marital violence" during pregnancy                                           | Postnatal depression at 6 months, EPDS, past 7 days                   | No                                                  | No               | Unadjusted                                                                                                                                                                                        | Interviewer administered                                            | RR=2.6 (1.6-4.3) p=0.001                                                                                                                                             |
| Tsai et al. [38]; 258 pregnant women; South Africa      | 3 years; 4 waves                     | 22.6%                  | Physical, CTS, last 12 months                                                 | Postpartum Depression, EPDS, past 7 days                              | Yes                                                 | No               | Intervention or control arm; age; completion of high school; household wealth; employment full time or part time; whether father or baby is with participant; HIV serostatus; high blood pressure | Interviewer administered                                            | Coefficient=1.04 (0.61-1.47)                                                                                                                                         |





1  
2  
3  
4

| Study, Participants, Country                             | Length of Follow-up; Number of Waves | Attrition at Last Wave | IPV Measure and Timeframe                                                              | Health Outcome Measure and Timeframe                                 | Adjusted for Time 1 Dependent Variable <sup>a</sup> | Adjusted for CSA | Other Variables Adjusted For                                                                                                                                                                                                                | Mode of administration                                                                    | Effect Estimate                             |
|----------------------------------------------------------|--------------------------------------|------------------------|----------------------------------------------------------------------------------------|----------------------------------------------------------------------|-----------------------------------------------------|------------------|---------------------------------------------------------------------------------------------------------------------------------------------------------------------------------------------------------------------------------------------|-------------------------------------------------------------------------------------------|---------------------------------------------|
| <b>Postpartum depression – IPV as dependent variable</b> |                                      |                        |                                                                                        |                                                                      |                                                     |                  |                                                                                                                                                                                                                                             |                                                                                           |                                             |
| Tsai et al. [38]; 658 pregnant women; South Africa       | 3 years; 4 waves                     | 22.6%                  | Physical, CTS, last 12 months                                                          | Postpartum Depression, EPDS, past 7 days                             | Yes                                                 | No               | Intervention or control arm; age at baseline; completion of high school; household wealth; employment full time or part time; whether father or baby is with participant; HIV serostatus; high blood pressure                               | Interviewer administered                                                                  | Beta=0.054 (0.030-0.079)                    |
| <b>Suicide attempts as dependent variable</b>            |                                      |                        |                                                                                        |                                                                      |                                                     |                  |                                                                                                                                                                                                                                             |                                                                                           |                                             |
| Chowdhary & Patel [39]; 8,750 adult women; India         | 1 year; 3 waves                      | -                      | Verbal, CTS-like, last 3 months                                                        | Single question, ever attempted suicide                              | Yes                                                 | No               | Age; literacy; household per capita income                                                                                                                                                                                                  | Interviewer administered                                                                  | aOR=2.84 (0.55-14.73)                       |
| Roberts et al. [22]; 2,206 adolescents; USA              | 1 year; 2 waves                      | -                      | Verbal, threats, physical, CTS, last 12 months                                         | Single question, ever attempted suicide                              | Yes                                                 | No               | Sociodemographic factors; highest level of abuse by a partner prior to wave 1; number of sexual partners between wave 1 and 2; time elapsed between wave 1 and wave 2; level of risk behaviour at wave 1 (alcohol use/illicit substance us) | Computer assisted self- interview                                                         | Beta=0.12 (0.02-0.22)                       |
| <b>Perceived stress as dependent variable</b>            |                                      |                        |                                                                                        |                                                                      |                                                     |                  |                                                                                                                                                                                                                                             |                                                                                           |                                             |
| Salzaar et al. [44]; 398 adults; Nicaragua               | 3 years; 2 waves                     | 16.7%                  | Emotional, physical, sexual, WHO Survey, last 12 months                                | Perceived emotional distress, SRQ,                                   | No                                                  | No               | None                                                                                                                                                                                                                                        | Interviewer administered                                                                  | OR=4.59 (2.5-8.45) calculated               |
| Testa et al. 2001 [27]; 494 adult women; USA             | 2 years; 2 waves                     | 9.0%                   | Verbal aggression, CTS, last 12 months<br><br>Physical aggression, CTS, last 12 months | Perceived Stress, Cohen et al. 1983 a 14-item measure, past 6 months | Yes                                                 | No               | Race; have a child/pregnant; time 1 marital satisfaction; time 1 verbal aggression                                                                                                                                                          | Self-administered at time 1 and interviewer administered or telephone interview at time 2 | Beta=0.18; p<0.001<br><br>Beta=0.11; p<0.05 |
| Study, Participants, Country                             | Length of Follow-up;                 | Attrition at Last Wave | IPV Measure and Timeframe                                                              | Health Outcome                                                       | Adjusted for Time 1                                 | Adjusted for CSA | Other Variables Adjusted For                                                                                                                                                                                                                | Mode of administration                                                                    | Effect Estimate                             |

40  
41  
42  
43  
44  
45  
46  
47

1  
2  
3  
4

| Country                                                                   | Number of Waves  |       |                                                    | Measure and Timeframe                                                                                     | Dependent Variable <sup>a</sup> |     |                                                                                                                                   |                                                                     |                       |  |
|---------------------------------------------------------------------------|------------------|-------|----------------------------------------------------|-----------------------------------------------------------------------------------------------------------|---------------------------------|-----|-----------------------------------------------------------------------------------------------------------------------------------|---------------------------------------------------------------------|-----------------------|--|
| <b>General anxiety as dependent variable</b>                              |                  |       |                                                    |                                                                                                           |                                 |     |                                                                                                                                   |                                                                     |                       |  |
| Suglia et al. [25]; 1,834 adult women; USA                                | 3 years; 3 waves | -     | Physical and/or sexual, CTS-like, past 12 months   | Single question, asking if they had a period of 6 months or more when they felt worried, tense or anxious | Yes                             | No  | Age; ethnicity; education; marital status; economic hardship; IPV                                                                 | Interviewer administered                                            | aOR=1.95 (1-3.8)      |  |
| <b>Self-perceived health status as dependent variable</b>                 |                  |       |                                                    |                                                                                                           |                                 |     |                                                                                                                                   |                                                                     |                       |  |
| Escriba-Aguir et al. [42]; 888 pregnant women; Spain                      | 1 year; 4 waves  | 33.5% | Psychological, Abuse AAS, past 12 months           | Respondents asked to report their general health as: very good; good; fair; poor; very poor               | Yes                             | No  | Sociodemographic factors (age, marital status, education, employment status, native country); negative life events                | Self-administered, interviewer administered and telephone interview | aOR=4.32 (1.58-11.87) |  |
| <b>Hard drug use (cocaine, crack, heroin) as dependent variable</b>       |                  |       |                                                    |                                                                                                           |                                 |     |                                                                                                                                   |                                                                     |                       |  |
| Algeria et al. [41]; 452 adult women; Puerto Rico                         | 3 years; 3 waves | -     | Physical and/or psychological, CTS, last 12 months | Hard core drug use, self-report of crack or cocaine, heroin, past 12 months                               | Yes                             | No  | Education; employment; very severe partner violence; alcohol use in last year                                                     | Computer assisted personal interview                                | aOR=2.02 (1.04-3.91)  |  |
| El-Bassel et al. [21]; 317 adult women; USA                               | 1 year; 3 waves  | 24.0% | Physical and/or sexual, CTS, last 6 months         | “Drug Use and Risk Behaviour Questionnaire”, Cocaine use once a week or more, last 6 months               | No                              | Yes | Socio-demographics; history of trauma (childhood sexual abuse, PTSD); psychological distress; social support; HIV risk behaviours | Interviewer administered                                            | aOR=2.10 (0.82-5.5)   |  |
| <b>Hard drug use (cocaine, crack, heroin) – IPV as dependent variable</b> |                  |       |                                                    |                                                                                                           |                                 |     |                                                                                                                                   |                                                                     |                       |  |
| El-Bassel et al. [21]; 317 adult women; USA                               | 1 year; 3 waves  | 24.0% | Physical and/or sexual, CTS, last 6 months         | “Drug Use and Risk Behaviour Questionnaire”, Crack use once a week or more, last 6 months                 | No                              | Yes | Socio-demographics; history of trauma (childhood sexual abuse, PTSD); psychological distress; social support; HIV risk behaviours | Interviewer administered                                            | aOR=1.6 (0.84-3.0)    |  |

36  
37  
38  
39  
40  
41  
42  
43  
44  
45  
46  
47

1  
2  
3  
4  
5  
6  
7  
8  
9  
10  
11  
12  
13  
14  
15  
16  
17  
18  
19  
20  
21  
22  
23  
24  
25  
26  
27  
28  
29  
30  
31  
32  
33  
34  
35  
36  
37  
38  
39  
40  
41  
42  
43  
44  
45  
46  
47

| Study, Participants, Country                | Length of Follow-up; Number of Waves | Attrition at Last Wave | IPV Measure and Timeframe                                                                                           | Health Outcome Measure and Timeframe                                                                 | Adjusted for Time 1 Dependent Variable <sup>a</sup> | Adjusted for CSA | Other Variables Adjusted For                                                                                                                                                                                                                                                                                  | Mode of administration                                                | Effect Estimate                                  |
|---------------------------------------------|--------------------------------------|------------------------|---------------------------------------------------------------------------------------------------------------------|------------------------------------------------------------------------------------------------------|-----------------------------------------------------|------------------|---------------------------------------------------------------------------------------------------------------------------------------------------------------------------------------------------------------------------------------------------------------------------------------------------------------|-----------------------------------------------------------------------|--------------------------------------------------|
| Gilbert et al. [14]; 185 adult women; USA   | 1 year; 3 waves                      | 23.2%                  | Physical, injurious, sexual, CTS, last 6 months                                                                     | “Drug Use and Risk Behaviour Questionnaire”, Hard drug use (cocaine, crack or heroin), last 6 months | Yes                                                 | Yes              | Socio-demographics (age, ethnicity, employment, marital status); homelessness; incarceration; childhood sexual abuse, psychological distress; active or avoidant coping; partner illicit drug use; partner binge drinking; financial dependency; sexual relationship power scale; perceived community support | Interviewer administered                                              | RR=1.6 (1.08-2.36)                               |
| Testa et al. [28] 724 adult women; USA      | 1 year; 2 waves                      | -                      | Minor violence from same partner, CTS, last 12 months<br><br>Severe violence from same partner, CTS, last 12 months | Hard drug use, past year                                                                             | Yes                                                 | No               | Race; age; cohabiting; married; time 1 psychological aggression; marijuana use                                                                                                                                                                                                                                | Computer assisted self-interview, and self-administered postal survey | aOR=2.41 (1.36-4.26)<br><br>aOR=2.87 (1.39-5.92) |
| <b>Marijuana use as dependent variable</b>  |                                      |                        |                                                                                                                     |                                                                                                      |                                                     |                  |                                                                                                                                                                                                                                                                                                               |                                                                       |                                                  |
| El-Bassel et al. [21]; 317 adult women; USA | 1 year; 3 waves                      | 24.0%                  | Physical and/or sexual, CTS, last 6 months                                                                          | “Drug Use and Risk Behaviour Questionnaire”, Marijuana use once a week or more, last 6 months        | No                                                  | Yes              | Socio-demographics; history of trauma (childhood sexual abuse, PTSD); psychological distress; social support; HIV risk behaviours                                                                                                                                                                             | Interviewer administered                                              | aOR=2.4 (0.92-6.2)                               |

1  
2  
3  
4

| Study, Participants, Country                        | Length of Follow-up; Number of Waves | Attrition at Last Wave | IPV Measure and Timeframe                       | Health Outcome Measure and Timeframe                                                                 | Adjusted for Time 1 Dependent Variable <sup>a</sup> | Adjusted for CSA | Other Variables Adjusted For                                                                                                                                                                                                                                                                                                | Mode of administration                        | Effect Estimate     |
|-----------------------------------------------------|--------------------------------------|------------------------|-------------------------------------------------|------------------------------------------------------------------------------------------------------|-----------------------------------------------------|------------------|-----------------------------------------------------------------------------------------------------------------------------------------------------------------------------------------------------------------------------------------------------------------------------------------------------------------------------|-----------------------------------------------|---------------------|
| 8 Gilbert et al. [14]; 185 adult women; USA         | 1 year; 3 waves                      | 23.2%                  | Physical, CTS, last 6 months                    | “Drug Use and Risk Behaviour Questionnaire”, Marijuana use, last 6 months                            | Yes                                                 | Yes              | Socio-demographics (age, ethnicity, employment, marital status); homelessness; incarceration; childhood sexual abuse, psychological distress; active or avoidant coping; partner illicit drug use; partner binge drinking; financial dependency; sexual relationship power scale; perceived community support; baseline IPV | Interviewer administered                      | RR=1.14 (0.81-1.6)  |
| 19 Nowotny & Graves [16]; 2,959 adolescents; USA    | 6 years; 2 waves                     | -                      | Sexual, CTS-like, last 12 months                | Marijuana use (any), last 12 months                                                                  | Yes                                                 | No               | Age; married; education; employment; personal income                                                                                                                                                                                                                                                                        | Computer assisted personal and self-interview | aOR=1.4 (0.97-2.08) |
| <b>23 Marijuana use – IPV as dependent variable</b> |                                      |                        |                                                 |                                                                                                      |                                                     |                  |                                                                                                                                                                                                                                                                                                                             |                                               |                     |
| 24 El-Bassel et al. [22]; 317 adult women; USA      | 1 year; 3 waves                      | 24.0%                  | Physical and/or sexual, CTS, last 6 months      | “Drug Use and Risk Behaviour Questionnaire”, Marijuana use once a week or more, last 6 months        | No                                                  | No               | Socio-demographics; history of trauma (childhood sexual abuse, PTSD); psychological distress; social support; HIV risk behaviours                                                                                                                                                                                           | Interviewer administered                      | aOR=4.5 (2.4-8.4)   |
| 30 Gilbert et al. [14]; 185 adult women; USA        | 1 year; 3 waves                      |                        | Physical, injurious, sexual, CTS, last 6 months | “Drug Use and Risk Behaviour Questionnaire”, Hard drug use (cocaine, crack or heroin), last 6 months | Yes                                                 | Yes              | Socio-demographics (age, ethnicity, employment, marital status); homelessness; incarceration; childhood sexual abuse, psychological distress; active or avoidant coping; partner illicit drug use; partner binge drinking; financial dependency; sexual relationship power scale; perceived community support               | Interviewer administered                      | RR=0.94 (0.71-1.24) |

40  
41  
42  
43  
44  
45  
46  
47

1  
2  
3  
4

| Study, Participants, Country                                                           | Length of Follow-up; Number of Waves | Attrition at Last Wave | IPV Measure and Timeframe                                                                                           | Health Outcome Measure and Timeframe                                                                                         | Adjusted for Time 1 Dependent Variable <sup>a</sup> | Adjusted for CSA | Other Variables Adjusted For                                                                                                                                                                                                                                                                                                | Mode of administration                                                | Effect Estimate                                  |
|----------------------------------------------------------------------------------------|--------------------------------------|------------------------|---------------------------------------------------------------------------------------------------------------------|------------------------------------------------------------------------------------------------------------------------------|-----------------------------------------------------|------------------|-----------------------------------------------------------------------------------------------------------------------------------------------------------------------------------------------------------------------------------------------------------------------------------------------------------------------------|-----------------------------------------------------------------------|--------------------------------------------------|
| 8 <sup>b</sup> Testa et al.<br>9 [28] 724 adult<br>10 women; USA                       | 1 year; 2 waves                      | -                      | Minor violence from same partner, CTS, last 12 months<br><br>Severe violence from same partner, CTS, last 12 months | Marijuana use, past year                                                                                                     | Yes                                                 | No               | Race; age; cohabiting; married; time 1 psychological aggression; marijuana use                                                                                                                                                                                                                                              | Computer assisted self-interview, and self-administered postal survey | aOR=0.98 (0.59-1.64)<br><br>aOR=1.78 (0.92-3.44) |
| <b>Other combinations of illicit drug use and/or alcohol use as dependent variable</b> |                                      |                        |                                                                                                                     |                                                                                                                              |                                                     |                  |                                                                                                                                                                                                                                                                                                                             |                                                                       |                                                  |
| 16 Gilbert et al.<br>17 [14]; 185 adult<br>18 women; USA                               | 1 year; 3 waves                      | 23.2%                  | Physical, injurious, sexual, CTS, last 6 months<br><br>Physical, CTS, last 6 months                                 | “Drug Use and Risk Behaviour Questionnaire”, any illicit drug use, last 6 months                                             | Yes                                                 | Yes              | Socio-demographics (age, ethnicity, employment, marital status); homelessness; incarceration; childhood sexual abuse, psychological distress; active or avoidant coping; partner illicit drug use; partner binge drinking; financial dependency; sexual relationship power scale; perceived community support; baseline IPV | Interviewer administered                                              | RR=1.15 (0.83-1.58)<br><br>RR=0.9 (0.65-1.26)    |
| 29 Newcomb et al.<br>30 [23]; 113 adult<br>31 women; USA                               | 1 year; 3 waves                      | 24.0%                  | Psychological and/or physical, CTS, past 6 months                                                                   | Participants asked if they had ever used 16 illegal drugs including cocaine, crack, heroin, marijuana and others not listed. | Yes                                                 | No               | Age, education, relationship status                                                                                                                                                                                                                                                                                         | Interviewer administered                                              | Path coefficient=0.18, p<0.05                    |

37  
38  
39  
40  
41  
42  
43  
44  
45  
46  
47

1  
2  
3  
4

| Study, Participants, Country                    | Length of Follow-up; Number of Waves | Attrition at Last Wave | IPV Measure and Timeframe                   | Health Outcome Measure and Timeframe                                                                                                                                | Adjusted for Time 1 Dependent Variable <sup>a</sup> | Adjusted for CSA | Other Variables Adjusted For                                                                                                                                          | Mode of administration                        | Effect Estimate                                                                                                                         |
|-------------------------------------------------|--------------------------------------|------------------------|---------------------------------------------|---------------------------------------------------------------------------------------------------------------------------------------------------------------------|-----------------------------------------------------|------------------|-----------------------------------------------------------------------------------------------------------------------------------------------------------------------|-----------------------------------------------|-----------------------------------------------------------------------------------------------------------------------------------------|
| Nowotny & Graves [16]; 959 adolescents; USA     | 6 years; 2 waves                     | -                      | Physical, CTS-like, last 12 months          | Drug use (MDMA, inhalents, LSD, heroin, PCP or other illegal drugs), last 12 months                                                                                 | Yes                                                 | No               | Age; married; education; employment; personal income                                                                                                                  | Computer assisted personal and self-interview | aOR=1.3 (0.8-2.15)                                                                                                                      |
| Roberts et al. [22]; 2,206 adolescents; USA     | 1 year; 2 waves                      | -                      | Physical, CTS, last 12 months               | Tobacco, alcohol and/or marijuana use, last 12 months                                                                                                               | Yes                                                 | No               | Sociodemographic factors; highest level of abuse by a partner prior to wave 1; number of sexual partners between wave 1 and 2; time elapsed between wave 1 and wave 2 | Computer assisted self-interview              | Beta=0.16 (0.06-2.26), p<0.05                                                                                                           |
| <b>Alcohol use as dependent variable</b>        |                                      |                        |                                             |                                                                                                                                                                     |                                                     |                  |                                                                                                                                                                       |                                               |                                                                                                                                         |
| Boden et al. [49]; 630 adult women; New Zealand | 10 years; 4 waves used               | -                      | Physical and/or sexual, CTS, last 12 months | CIDI - 1 to 2 symptoms versus none, last 12 months<br><br>CIDI - 3 to 5 symptoms versus none, last 12 months<br><br>CIDI - > 5 symptoms versus none, last 12 months | No                                                  | No               | Unadjusted                                                                                                                                                            | Not reported                                  | Population averaged IRR=1.58 (1.37-1.82)<br><br>Population averaged IRR=2.5 (1.88-2.89)<br><br>Population averaged IRR=3.38 (2.57-6.03) |
| El-Bassel et al. [21] 317 adult women; USA      | 1 year; 3 waves                      | 24.0%                  | Physical and/or sexual, CTS, last 6 months  | Binge drinking – drinking 4 or more alcoholic drinks within a 6-hour period) once a week or more in the past 6 months                                               | No                                                  | No               | Socio-demographics; history of trauma (childhood sexual abuse, PTSD); psychological distress; social support; HIV risk behaviours                                     | Interviewer administered                      | aOR=0.80 (0.04-17.0)                                                                                                                    |

39  
40  
41  
42  
43  
44  
45  
46  
47

1  
2  
3  
4  
5  
6  
7  
8  
9  
10  
11  
12  
13  
14  
15  
16  
17  
18  
19  
20  
21  
22  
23  
24  
25  
26  
27  
28  
29  
30  
31  
32  
33  
34  
35  
36  
37  
38  
39  
40  
41  
42  
43  
44  
45  
46  
47

| Study, Participants, Country                  | Length of Follow-up; Number of Waves | Attrition at Last Wave | IPV Measure and Timeframe                                                                                                                                                                                                                                                                                  | Health Outcome Measure and Timeframe                                                                    | Adjusted for Time 1 Dependent Variable <sup>a</sup> | Adjusted for CSA | Other Variables Adjusted For                                                                                                                                                                                                                                                                                                | Mode of administration   | Effect Estimate                                                                                            |
|-----------------------------------------------|--------------------------------------|------------------------|------------------------------------------------------------------------------------------------------------------------------------------------------------------------------------------------------------------------------------------------------------------------------------------------------------|---------------------------------------------------------------------------------------------------------|-----------------------------------------------------|------------------|-----------------------------------------------------------------------------------------------------------------------------------------------------------------------------------------------------------------------------------------------------------------------------------------------------------------------------|--------------------------|------------------------------------------------------------------------------------------------------------|
| Gao et al. [35]; 636 adult women; New Zealand | 2 years; 2 waves                     | 16.9%                  | Verbal aggression at 24 months postpartum only, CTS, last 12 months<br><br>Verbal aggression at 6 weeks and 24 months postpartum only, CTS, last 12 months<br><br>Physical at 24 months postpartum only, CTS, last 12 months<br><br>Physical at 6 weeks and 24 months postpartum only, CTS, last 12 months | High risk alcohol use - drank 6 or more alcoholic drinks on at least one occasion in the last 12 months | No                                                  | No               | Age; education; ethnicity; duration living in New Zealand; marital status; household income; whether born in New Zealand; cultural orientation; composite measures of verbal and physical violence                                                                                                                          | Interviewer administered | aOR=2.68 (0.57-12.62)<br><br>aOR=3.14 (0.71-13.92)<br><br>aOR=1.24 (0.69-2.23)<br><br>aOR=1.49 (0.78-2.84) |
| Gilbert et al. [14]; 185 adult women; USA     | 1 year; 3 waves                      | 23.2%                  | Physical, CTS, last 12 months                                                                                                                                                                                                                                                                              | "Drug Use and Risk Behaviour Questionnaire", Binge drinking, last 6 months                              | Yes                                                 | Yes              | Socio-demographics (age, ethnicity, employment, marital status); homelessness; incarceration; childhood sexual abuse, psychological distress; active or avoidant coping; partner illicit drug use; partner binge drinking; financial dependency; sexual relationship power scale; perceived community support; baseline IPV | Interviewer administered | RR=1.4 (0.97-2.02)                                                                                         |



1  
2  
3  
4

| Study, Participants, Country                  | Length of Follow-up; Number of Waves | Attrition at Last Wave | IPV Measure and Timeframe                                                                                              | Health Outcome Measure and Timeframe                                                                                                                 | Adjusted for Time 1 Dependent Variable <sup>a</sup> | Adjusted for CSA | Other Variables Adjusted For                                                                                                                                                                                                               | Mode of administration                                                                                            | Effect Estimate                                                                                                    |
|-----------------------------------------------|--------------------------------------|------------------------|------------------------------------------------------------------------------------------------------------------------|------------------------------------------------------------------------------------------------------------------------------------------------------|-----------------------------------------------------|------------------|--------------------------------------------------------------------------------------------------------------------------------------------------------------------------------------------------------------------------------------------|-------------------------------------------------------------------------------------------------------------------|--------------------------------------------------------------------------------------------------------------------|
| Keiley et al. [15]; 195 couples; USA          | 2.5 years; 2 waves                   | -                      | Physical, CTS, last 12 months<br><br><br><br><br><br><br><br><br><br>Verbal, CTS, last 12 months                       | ADS and MAST, last 12 months                                                                                                                         | Yes                                                 | No               | Socio-economic status; race; wife's reports of their own anxiety and depression; wife's reports of their own physical and verbal aggression towards husband; wife's reports of their husband's physical and verbal aggression towards them | Self-administered and interviewer administered                                                                    | Slope=0.011<br>Quadratic=0.001<br>NS<br><br><br><br><br><br><br><br><br><br>Slope=-0.009<br>Quadratic=-0.006<br>NS |
| Nowotny & Graves [16]; 2,959 adolescents; USA | 6 years; 2 waves                     | -                      | Threats, minor violence, CTS-like, last 12 months                                                                      | Binge drinking: drinking five or more drinks during a single occasion at least two to three times a month in the past year                           | Yes                                                 | No               | Age; married; education; employment; personal income                                                                                                                                                                                       | Computer assisted personal and self-interview                                                                     | aOR=1.0 (0.71-1.43)                                                                                                |
| Testa et al. 2001 [27]; 494 adult women; USA  | 2 years; 2 waves                     | 9.0%                   | Verbal aggression, CTS, last 12 months<br><br><br><br><br><br><br><br><br><br>Physical aggression, CTS, last 12 months | Alcohol consumption, average daily volume. Heavy drinking index, 6+ drinks single occasion and drinking to intoxication (continuous), last 12 months | Yes                                                 | No               | Race; have a child/pregnant; time 1 marital satisfaction; time 1 verbal aggression                                                                                                                                                         | Self-complete questionnaire at time 1 and in-person/telephone interview and self-complete questionnaire at time 2 | Beta=-0.4; NS<br><br><br><br><br><br><br><br><br><br>Beta=0.09; p<0.05                                             |

39  
40  
41  
42  
43  
44  
45  
46  
47

1  
2  
3  
4

| Study, Participants, Country                    | Length of Follow-up; Number of Waves | Attrition at Last Wave | IPV Measure and Timeframe                                                                                           | Health Outcome Measure and Timeframe                                                                                                                                                         | Adjusted for Time 1 Dependent Variable <sup>a</sup> | Adjusted for CSA | Other Variables Adjusted For                                                                  | Mode of administration                                                | Effect Estimate                                                                             |
|-------------------------------------------------|--------------------------------------|------------------------|---------------------------------------------------------------------------------------------------------------------|----------------------------------------------------------------------------------------------------------------------------------------------------------------------------------------------|-----------------------------------------------------|------------------|-----------------------------------------------------------------------------------------------|-----------------------------------------------------------------------|---------------------------------------------------------------------------------------------|
| Zlotnick et al. [19]; 2,905 adult women; USA    | 5 years; 2 waves                     | -                      | Physical, CTS-like, last 12 months                                                                                  | National Survey of Alcohol and Drug Abuse Questions. Four items coded on a 6-point scale ranging from 0 (abstinent) to 3 (high moderate use) to 5 (binge drinking) past 30 days              | No                                                  | No               | Unadjusted                                                                                    | Self-administered and interviewer administered                        | IPV: Weighted mean score=1.45 (SE=0.19)<br>No IPV: Weighted mean score=0.87 (SE=0.06)<br>NS |
| <b>Alcohol use – IPV as dependent variable</b>  |                                      |                        |                                                                                                                     |                                                                                                                                                                                              |                                                     |                  |                                                                                               |                                                                       |                                                                                             |
| Marsh-Buzy et al. [29]; 73 school students; USA | 4 months, 2 waves                    | 31.1%                  | Physical and/or sexual, CTS, past 4 months                                                                          | Alcohol use – quantity/frequency measure, past 4 months                                                                                                                                      | Yes                                                 | No               | None                                                                                          | Self-administered                                                     | aOR=3.94; p=0.04                                                                            |
| Testa et al. [2003 [28]; 724 adult women; USA   | 1 year; 2 waves                      | -                      | Severe violence from same partner, CTS, last 12 months<br><br>Minor violence from same partner, CTS, last 12 months | Heavy episodic drinking in past 12 months consisted of mean response to two questions on frequency of consuming 5 or more drinks in a single day and frequency of drinking until intoxicated | Yes                                                 | No               | Race; age; cohabiting; married; time 1 psychological aggression; marijuana use; hard drug use | Computer assisted self-interview, and self-administered postal survey | aOR=1.0 (0.71-1.4)<br><br>aOR=1.2 (0.93-1.56)                                               |

36  
37  
38  
39  
40  
41  
42  
43  
44  
45  
46  
47

1  
2  
3  
4

| Study, Participants, Country                                | Length of Follow-up; Number of Waves | Attrition at Last Wave | IPV Measure and Timeframe                          | Health Outcome Measure and Timeframe                                                                                                               | Adjusted for Time 1 Dependent Variable <sup>a</sup> | Adjusted for CSA | Other Variables Adjusted For                                                                                                                           | Mode of administration   | Effect Estimate      |
|-------------------------------------------------------------|--------------------------------------|------------------------|----------------------------------------------------|----------------------------------------------------------------------------------------------------------------------------------------------------|-----------------------------------------------------|------------------|--------------------------------------------------------------------------------------------------------------------------------------------------------|--------------------------|----------------------|
| <b>HIV infection as dependent variable</b>                  |                                      |                        |                                                    |                                                                                                                                                    |                                                     |                  |                                                                                                                                                        |                          |                      |
| El-Bassel et al. [20] 405 adult women; USA                  | 1 year; 3 waves                      | 24.0%                  | Physical and/or sexual, last 6 months              | HIV positive status                                                                                                                                | Yes                                                 | No               | Age; ethnicity; education; drug and alcohol use; baseline HIV risk behaviours                                                                          | Interviewer administered | aOR=0.21 (0.03-1.6)  |
| Jewkes et al. [36] 1,099 women and girls; South Africa      | 2 years; 3 waves                     | 12.5%                  | Physical and/or sexual, WHO Survey, last 12 months | HIV infection assessed with blood tests at all three waves                                                                                         | Yes                                                 | No               | Age; study treatment group; stratum; person years of exposure to HIV (years from baseline to last negative HIV test), herpes simplex virus at baseline | Interviewer administered | IRR=1.51 (1.04-2.21) |
| <b>Sexually transmitted infection as dependent variable</b> |                                      |                        |                                                    |                                                                                                                                                    |                                                     |                  |                                                                                                                                                        |                          |                      |
| Chowdhary & Patel [40]; 1,750 adult women; India            | 1 year; 3 waves                      | -                      | Physical, CTS-like, last 3 months                  | STI (chlamydia, gonorrhoea or trichomoniasis) biological testing, past 3 months                                                                    | No, but removes women who had STI at baseline       | No               | Age; literacy; household per capita income                                                                                                             | Interviewer administered | aOR=1.88 (0.64-5.53) |
| El-Bassel et al. [20] 405 adult women; USA                  | 1 year; 3 waves                      | 24.0%                  | Physical and/or sexual, CTS, last 6 months         | STI infection at wave 3                                                                                                                            | Yes                                                 | No               | Age; ethnicity; education; drug and alcohol use; baseline HIV risk behaviours                                                                          | Interviewer administered | aOR=0.88 (0.53-1.5)  |
| Wilson et al. [45]; 389 adult women; Kenya                  | Up to 2 years; unclear               | -                      | Physical and/or sexual, WHO, last 12 months        | STI at quarterly examination, Presence of gonorrhoeae, chlamydia trachomatis, or trichomonas vaginalis detected by nucleic acid amplification test | No                                                  | No               | Age; baseline alcohol use level; lifetime history of sexual violence since age of 15 by someone other than the index partner                           | Interviewer administered | aRR=0.88 (0.57-1.37) |

34  
35  
36  
37  
38  
39  
40  
41  
42  
43  
44  
45  
46  
47

1  
2  
3  
4

| Study, Participants, Country                       | Length of Follow-up; Number of Waves | Attrition at Last Wave | IPV Measure and Timeframe                   | Health Outcome Measure and Timeframe                                                                                     | Adjusted for Time 1 Dependent Variable <sup>a</sup> | Adjusted for CSA | Other Variables Adjusted For                                                  | Mode of administration                        | Effect Estimate                                                                                       |
|----------------------------------------------------|--------------------------------------|------------------------|---------------------------------------------|--------------------------------------------------------------------------------------------------------------------------|-----------------------------------------------------|------------------|-------------------------------------------------------------------------------|-----------------------------------------------|-------------------------------------------------------------------------------------------------------|
| <b>Sexual risk behaviour as dependent variable</b> |                                      |                        |                                             |                                                                                                                          |                                                     |                  |                                                                               |                                               |                                                                                                       |
| El-Bassel et al. (2010) 405 adult women; USA       | 1 year; 3 waves                      | 24.0%                  | Physical and/or sexual, last 6 months       | Unprotected anal sex<br><br>Condom use consistency<br><br>Condom request consistency<br><br>Multiple concurrent partners | Yes                                                 | No               | Age; ethnicity; education; drug and alcohol use; baseline HIV risk behaviours | Interviewer administered                      | aOR=1.8 (0.58-5.5)<br><br>aOR=0.41 (0.24-0.71)<br><br>aOR=0.42 (0.22-0.82)<br><br>aOR=3.1 (0.89-11.0) |
| Teitelman et al. (2015); 2,629 adolescents; USA    | 7 years; 2 waves<br>Is it 2 waves    | -                      | Verbal and/or physical, CTS, last 12 months | HIV risk (condom use), last 12 months                                                                                    | Yes                                                 | No               | Age; race/ethnicity; family income                                            | Computer assisted personal and self-interview | aOR=1.59 (1.16-2.18)                                                                                  |

24  
25  
26  
27  
28  
29  
30  
31  
32  
33  
34  
35  
36  
37  
38  
39  
40  
41  
42  
43  
44  
45  
46  
47

1  
2  
3  
4

| Study, Participants, Country               | Length of Follow-up; Number of Waves | Attrition at Last Wave | IPV Measure and Timeframe                   | Health Outcome Measure and Timeframe                                                                                                                                                                                                                                                            | Adjusted for Time 1 Dependent Variable <sup>a</sup> | Adjusted for CSA | Other Variables Adjusted For                                                                                                 | Mode of administration   | Effect Estimate                                                                                                                                                 |
|--------------------------------------------|--------------------------------------|------------------------|---------------------------------------------|-------------------------------------------------------------------------------------------------------------------------------------------------------------------------------------------------------------------------------------------------------------------------------------------------|-----------------------------------------------------|------------------|------------------------------------------------------------------------------------------------------------------------------|--------------------------|-----------------------------------------------------------------------------------------------------------------------------------------------------------------|
| Wilson et al. [45]; 389 adult women; Kenya | Up to 2 years; unclear               | -                      | Physical and/or sexual, WHO, last 12 months | Unprotected anal and/or vaginal sex, past week<br><br>100% condom use, past week<br><br>2 or more sexual partners, past week<br><br>3 or more sex acts, past week<br><br>Semen detection by prostate specific antigen test PSA as a biomarker of unprotected sex<br><br>No sex in the past week | No                                                  | No               | Age; baseline alcohol use level; lifetime history of sexual violence since age of 15 by someone other than the index partner | Interviewer administered | aRR=1.91 (1.32-2.78)<br><br>aRR=0.90 (0.82-0.99)<br><br>aRR=0.96 (0.76-1.21)<br><br>aRR=1.0 (0.79-1.26)<br><br>aRR=1.54 (1.17-2.04)<br><br>aRR=0.67 (0.54-0.83) |

32  
33  
34  
35  
36  
37  
38  
39  
40  
41  
42  
43  
44  
45  
46  
47

1  
2  
3  
4

| Study, Participants, Country                                  | Length of Follow-up; Number of Waves | Attrition at Last Wave | IPV Measure and Timeframe         | Health Outcome Measure and Timeframe      | Adjusted for Time 1 Dependent Variable <sup>a</sup> | Adjusted for CSA | Other Variables Adjusted For               | Mode of administration   | Effect Estimate      |
|---------------------------------------------------------------|--------------------------------------|------------------------|-----------------------------------|-------------------------------------------|-----------------------------------------------------|------------------|--------------------------------------------|--------------------------|----------------------|
| <b>Gynaecological problems as dependent variable</b>          |                                      |                        |                                   |                                           |                                                     |                  |                                            |                          |                      |
| <sup>c</sup> Chowdhary & Patel [39]; 1,750 adult women; India | 1 year; 3 waves                      | -                      | Physical, CTS-like, last 3 months | Abnormal vaginal discharge, last 3 months | No, but removes women who had condition at baseline | No               | Age; literacy; household per capita income | Interviewer administered | aOR=1.06 (0.44-2.58) |
|                                                               |                                      |                        | Sexual, CTS-like, last 3 months   | Dysuria, last 3 months                    |                                                     |                  |                                            |                          | aOR=1.57 (0.6-4.14)  |
|                                                               |                                      |                        | Physical, CTS-like, last 3 months | Lower abdominal pain, last 3 months       |                                                     |                  |                                            |                          | aOR=1.2 (0.63-2.32)  |
|                                                               |                                      |                        | Physical, CTS-like, last 3 months | Dyspareunia, last 3 months                |                                                     |                  |                                            |                          | aOR=2.15 (0.8-5.82)  |

19  
20 <sup>a</sup> Refers to the dependent variable21 <sup>b</sup> Estimates are mutually exclusive as based on different sub-samples22 <sup>c</sup> More than one estimate reported in the study, but preference given to one estimate using the following algorithm: estimate derived from multivariate analysis; the definition of IPV closely matches that of other studies in the health outcome group; where the reference group was unexposed to any violence; where the estimate was most precise

23 NS, Not statistically significant

24 CSA, Childhood sexual abuse

25 AAS, Abuse Assessment Screen; ADS, Alcohol Dependence Scale; BDI, Beck Depression Inventory; CAS, Composite Abuse Scale; CES-D, Center for Epidemiological Studies-Depression;  
26 CIDI-SF, Composite International Diagnostic Interview-Short Form; CTS, Conflict Tactics Scale; HADS, Hospital Anxiety and Depression Scale; ISA, Index of Spouse Abuse; MAST,  
27 Michigan Alcoholism Screening Test; PHQ-9, Patient Health Questionnaire; SRQ, Self-Report Questionnaire; SVAWS, Severity of Violence Against Women Scale

28

29

30

31

32

33

34

35

36

37

38

39

40

41

42

43

44

45

46

47

## Results

### *Study characteristics*

Thirty-five separate cohort studies described in 36 articles published between 2002 and 2017 with 48,863 participants met the inclusion criteria and contained 174 effect estimates of association between IPV and health outcomes. Eighteen articles were from the USA,<sup>13-30</sup> three from Australia,<sup>31-33</sup> two from New Zealand,<sup>34,35</sup> three from South Africa,<sup>36-38</sup> two from India,<sup>39,40</sup> one from Puerto Rico,<sup>41</sup> one from Spain,<sup>42</sup> one from Korea,<sup>43</sup> one from Nicaragua,<sup>44</sup> one from Kenya,<sup>45</sup> one from Japan,<sup>46</sup> one from the UK,<sup>47</sup> and one from Tanzania.<sup>48</sup> Amongst the 35 cohort studies, 11 were household surveys,<sup>13,19,27,28,32,35,39,43,44,47,49</sup> 14 sampled participants from clinical settings,<sup>14,20,21,23,25,26,30,31,33</sup> {Rogathi, 2017 #4192 40 42 45 46} seven from schools,<sup>16,17,22,24,29,36,50</sup> and three from the local community.<sup>15,38,41</sup> Some studies were based on sub-populations of women including one study (reported in two papers) of women receiving methadone maintenance treatment,<sup>20,21</sup> women attending a clinic with depressive symptoms at baseline,<sup>31</sup> HIV-positive female sex workers,<sup>45</sup> and eight studies of pregnant women.<sup>30,33,38,40,42,46-48</sup> Six studies focussed on adolescents<sup>16-18,22,24,29</sup> and one (reported in two papers) included women and young girls.<sup>36,37</sup>

Table 2 presents the different health outcomes measured in the studies, the number of studies that measure each health condition, the overall number of estimates that contribute to each health condition, and the number of estimates that contribute to the meta-analysis.

**Table 2: Health outcomes/health risk behaviours measured in the 35 studies and number of estimates**

| Health outcome                                 | Number of studies and estimates, refs                             | Number of estimates in the meta-analysis |
|------------------------------------------------|-------------------------------------------------------------------|------------------------------------------|
| Depression                                     | 13 studies; <sup>13 17 19 22-26 31 32 37 39 43</sup> 13 estimates | 7                                        |
| Postpartum depression                          | 8 studies; <sup>30 33 38 40 42 46-48</sup> 11 estimates           | 7                                        |
| Suicide attempts                               | 2 studies; <sup>22 39</sup> 2 estimates                           | NA                                       |
| Perceived stress                               | 2 studies; <sup>27 44</sup> 3 estimates                           | NA                                       |
| General anxiety                                | 1 study; <sup>25</sup> 1 estimate                                 | NA                                       |
| Self-perceived health status                   | 1 study; <sup>42</sup> 1 estimate                                 | NA                                       |
| Hard drug use                                  | 4 studies; <sup>14 21 28 41</sup> 6 estimates                     | 5                                        |
| Marijuana use                                  | 4 studies; <sup>14 16 21 28</sup> 7 estimates                     | 5                                        |
| Other combinations of illicit drug/alcohol use | 4 studies; <sup>14 16 22 23</sup> 5 estimates                     | NA                                       |
| Alcohol use                                    | 10 studies; <sup>14-16 19 21 27 29 35 49</sup> 18 estimates       | 9                                        |
| HIV infection                                  | 2 studies; <sup>20 36</sup> 3 estimates                           | NA                                       |
| STIs                                           | 3 studies; <sup>20 39 45</sup> 2 estimates                        | NA                                       |
| Sexual risk behaviours                         | 3 studies; <sup>18 20 45</sup> 8 estimates                        | NA                                       |
| Abnormal vaginal discharge                     | 1 study; <sup>39</sup> 3 estimates                                | NA                                       |
| Dysuria                                        | 1 study; <sup>39</sup> 3 estimates                                | NA                                       |
| Lower abdominal pain                           | 1 study; <sup>39</sup> 3 estimates                                | NA                                       |
| Dyspareunia                                    | 1 study; <sup>39</sup> 3 estimates                                | NA                                       |

NA- Not applicable as study estimates were continuous and could not be included in a meta-analysis

Table 1 summarises quality issues in relation to the 36 papers reporting on 35 separate cohort studies included in the review. All but three of the 35 cohort studies used recognised, validated IPV instruments or used items that were taken from validated instruments.<sup>40 43 47</sup> All, but nine studies assessed for IPV that occurred in the last 12 months; one measured IPV in the last three months,<sup>39</sup> two in the last six months,<sup>20 21 23</sup> one in the last four months,<sup>29</sup> four measured IPV that occurred during pregnancy,<sup>40 46-48</sup> and one measure IPV during or within 12 months of pregnancy.<sup>30</sup> Most of the studies assessed for physical and/or sexual violence from a partner, with some also including threats, emotional or verbal abuse. The attrition rate was reported or calculated in 19 studies and ranged from 4.6%<sup>48</sup> to 37.4%.<sup>31</sup> The length of follow-up ranged from one month<sup>46</sup> to ten years<sup>49</sup> and the number of waves ranged from two (multiple studies) to six.<sup>33</sup> The smallest sample size was 73 adolescents<sup>29</sup> and the largest was 1,303 adult women<sup>48</sup>. Table 1 presents all study estimates grouped by health outcome.



### ***IPV and depressive symptoms***

Thirteen studies examined the relationship between recent IPV and depressive symptoms<sup>13 17 19 22-26 31 32 37 39 43</sup> of which one examined the association in both directions.<sup>43</sup> Of these, nine studies provided nine estimates of association between IPV and subsequent depressive symptoms.<sup>13 19 22 23 25 31 32 39 43</sup> Eight of these estimates showed a positive direction of association between experience of IPV and subsequent depressive symptoms.<sup>9 13 19 22 23 31 32 39</sup> Of the nine estimates of the association between IPV and subsequent depression, all but two reached statistical significance.<sup>25 39</sup> Five studies provided five estimates of association between depression and subsequent IPV, all of which showed a positive and statistically significant relationship.<sup>17 24 26 37 43</sup>

We were able to include seven estimates reporting binary IPV measures and binary depressive symptoms or disorder measures in the meta-analysis. For IPV and subsequent depressive symptoms or disorder, the pooled OR from five estimates<sup>13 25 31 32 39</sup> was 1.76 (95% CI 1.26-2.44,  $I^2 = 37.5%$   $p=0.172$ ). Two estimates<sup>17 37</sup> were included in the meta-analysis of the relationship between depressive symptoms and subsequent IPV, resulting in a pooled OR of 1.72 (95% CI 1.28-2.31,  $I^2 = 0.0%$ ,  $p=0.752$ ). One study, not included in the meta-analyses examined the bi-directional relationship between IPV and depression.<sup>43</sup> A Korean study of married women found that IPV at Wave 1 was positively associated with the depression level at Wave 1 (Beta=0.030, SE=0.03,  $p<0.001$ ), but negatively associated with the growth rate of depression over the study period (Beta=-0.03, SE=0.01,  $p=0.004$ ). IPV experienced at Wave 4 was associated with a larger growth rate of depression in the model (Beta=3.34, SE=0.61,  $p<0.001$ ) and the experience of IPV at Wave 1 (Beta=0.68, SE=0.11,  $p<0.001$ ). See Figure 2.

1  
2  
3 **Depression measurement:** Of the nine studies that measured IPV and subsequent depressive  
4 symptoms, one measured depressive symptoms occurring in the past 12 months,<sup>25</sup> one in the  
5 last two weeks,<sup>31</sup> five in the last week,<sup>13 19 22 32 43</sup> one “current”,<sup>39</sup> and one did not specify a  
6 time period.<sup>23</sup> Of the five studies that measured depressive symptoms and subsequent IPV,  
7 three measured depressive symptoms in the past week,<sup>17 37 43</sup> one in the past six months,<sup>24</sup> and  
8 one did not specify a time period.<sup>26</sup>  
9  
10  
11  
12  
13  
14  
15

16  
17  
18 All but one of the studies used screening questionnaires that measured depressive symptoms  
19 as opposed to diagnostic tools. Of the 13 studies, eight used the Center for Epidemiologic  
20 Studies Depression Scale (CES-D),<sup>13 17 19 22 23 32 37 43</sup> one study used the WHO ICD-10,<sup>39</sup> one  
21 used the Composite International Diagnostic Interview-Short Form (CIDI-SF),<sup>25</sup> one used the  
22 Patient Health Questionnaire (PHQ),<sup>31</sup> one used the Beck Depression Inventory (BDI),<sup>26</sup> and  
23 one used a scale from Kandell and Davies.<sup>24</sup>  
24  
25  
26  
27  
28  
29  
30

31  
32  
33 **Common risk factors/confounding:** Of the nine studies that measured IPV and subsequent  
34 depressive symptoms and disorder, all but one controlled for time one levels of depression.  
35 Chowdhary & Patel<sup>39</sup> excluded women with baseline depressive disorder in their analysis, but  
36 this may have resulted in the exclusion of cases of IPV that preceded depressive symptoms at  
37 baseline and the remaining cases may not have been representative of women experiencing  
38 IPV. All, but one of the five studies that measured depressive symptoms and later IPV,  
39 controlled for time one levels of IPV.<sup>26</sup> Of the 13 studies, all but 2 controlled for socio-  
40 demographic factors.<sup>26 39</sup> Other confounders were not comprehensively controlled for. Two  
41 studies controlled for childhood physical and/or sexual abuse<sup>17 31</sup> and two for alcohol use,<sup>24 37</sup>  
42 of which one also controlled for childhood adversity which measured emotional and physical  
43 neglect, and physical and sexual abuse.<sup>37</sup> There were no discernible differences in effect  
44  
45  
46  
47  
48  
49  
50  
51  
52  
53  
54  
55  
56  
57  
58  
59  
60

1  
2  
3 estimates regardless of which confounders were adjusted for and studies found similar  
4  
5 directions and varying magnitudes of association.  
6  
7

### 9 *IPV and postpartum depressive symptoms*

10  
11 Eight studies provided eleven estimates of association between IPV and subsequent  
12  
13 postpartum depressive symptoms.<sup>30 33 38 40 42 46-48</sup> All eleven estimates showed a positive  
14  
15 direction of association between IPV and subsequent postpartum depressive symptoms, with  
16  
17 all but one of the estimates reaching statistical significance.<sup>46</sup> Seven estimates from three  
18  
19 studies were included in the meta-analysis of the relationship between IPV and subsequent  
20  
21 postpartum depression,<sup>33 47 42 30 48</sup> resulting in a pooled OR of 2.19 (95% CI 1.39-3.45). This  
22  
23 was heterogeneous ( $I^2 = 79.8\%$ ,  $p=0.000$ ). One of the studies examined the bi-directional  
24  
25 relationship and found that depression symptom severity was associated with a greater risk of  
26  
27 subsequent IPV.<sup>38</sup> Each five point difference in the Edinburgh Postnatal Depression Scale  
28  
29 was associated with a 0.9 to 2.3 point difference in subsequent IPV risk (Beta=0.054; 95% CI  
30  
31 0.030-0.079).  
32  
33  
34  
35  
36

37 **Postpartum depression measurement:** Of the eight studies that measured IPV and  
38  
39 subsequent depressive symptoms, one measured depressive symptoms occurring in the past  
40  
41 12 months,<sup>42</sup> six studies measured depressive symptoms in the last week,<sup>33 38 40 46 47 48</sup> and one  
42  
43 study did not specify the time period.<sup>30</sup> One study measured postpartum depression in the last  
44  
45 week and subsequent IPV<sup>38</sup>. Of the eight studies, six used the Edinburgh Postnatal  
46  
47 Depression Scale (EPDS),<sup>33 38 40 42 47 48</sup> one used the Hospital Anxiety and Depression Scale  
48  
49 (HADS),<sup>46</sup> and one used the Beck Depression Inventory (BDI).<sup>30</sup>  
50  
51  
52  
53  
54  
55  
56  
57  
58  
59  
60

1  
2  
3 **Common risk factors/confounding:** Six of the eight studies that examined IPV and  
4 subsequent postpartum depression controlled for time one levels of depressive symptoms.<sup>33 38</sup>  
5  
6  
7 <sup>42 46 47 30</sup> One study did not control for time one levels of depressive symptoms as it was not  
8 significant in the bivariate analysis.<sup>48</sup> Five studies controlled for socio-demographic  
9 factors.<sup>33 38 42 46 48</sup> One study controlled for HIV serostatus<sup>38</sup> and one controlled for  
10 HIV/AIDS diagnosis.<sup>48</sup>  
11  
12  
13  
14  
15

### 16 *IPV and alcohol use*

17  
18 Ten studies examined the relationship between recent IPV and alcohol use. Of these, eight  
19 studies provided 15 estimates of association between IPV and subsequent alcohol use.<sup>14-16 19</sup>  
20  
21  
22 <sup>21 27 35 49</sup> All, but one of these 15 estimates showed a positive direction of association between  
23 IPV and subsequent alcohol use,<sup>15</sup> with two studies providing five estimates which reached  
24 statistical significance.<sup>27 49</sup> Two studies<sup>28 29</sup> provided three estimates showing a positive  
25 direction of association between alcohol use and subsequent IPV, of which one was  
26 statistically significant.<sup>29</sup>  
27  
28  
29  
30  
31  
32  
33  
34  
35  
36

37 For IPV and later alcohol use, the pooled OR from six estimates provided by three studies<sup>16 21</sup>  
38 <sup>35</sup> was 1.19 (95% CI 0.91-1.55,  $I^2 = 0.0\%$ ,  $p=0.523$ ). Three estimates from two studies<sup>28 29</sup>  
39 were included in the meta-analysis of the relationship between alcohol use and subsequent  
40 IPV, resulting in a pooled OR of 1.11 (95% CI 0.91-1.35,  $I^2 = 0.0\%$ ,  $p=0.672$ ).  
41  
42  
43  
44  
45  
46  
47

48 **Alcohol use measurement:** Of the eight studies that measured IPV and subsequent alcohol  
49 use, five measured alcohol use in the last 12 months,<sup>15 16 27 35 49</sup> two in the last six months,<sup>21 14</sup>  
50 and one in the last 30 days.<sup>19</sup> Of the two studies that measured alcohol use and subsequent  
51 IPV, one measured alcohol use in the last 12 months<sup>28</sup> and one in the last four months.<sup>29</sup>  
52  
53  
54  
55  
56  
57

1  
2  
3 Alcohol consumption was measured in a variety of ways. Of the 10 studies, one assessed  
4 alcohol abuse or dependence using the CIDI-SF,<sup>49</sup> four measured binge drinking which was  
5 based on the number of alcoholic drinks consumed on one occasion,<sup>14 16 21 35</sup> three measured  
6 heavy drinking which was assessed using a combined quantity-frequency measure,<sup>27-29</sup> one  
7 used the Alcohol Dependence Scale (ADS) and the Michigan Alcohol Screening Test  
8 (MAST),<sup>15</sup> and one used the National Survey of Alcohol and Drug Abuse (NSDUH).<sup>19</sup>

9  
10  
11  
12  
13  
14  
15  
16  
17  
18 **Common risk factors/confounding:** Of the eight studies that measured IPV and subsequent  
19 alcohol use, only four adjusted for time one levels of alcohol use.<sup>14-16 27</sup> Both studies that  
20 examined the association between alcohol use and subsequent IPV adjusted for time one  
21 levels of IPV.<sup>28 29</sup> Of the 10 studies, 7 controlled for socio-demographic factors.<sup>14-16 21 27 28 35</sup>  
22 Two studies adjusted for a history of trauma. El-Bassel<sup>21</sup> controlled for childhood sexual  
23 abuse, post-traumatic stress disorder, multiple concurrent partners and frequency of condom  
24 use. Gilbert<sup>14</sup> also controlled for childhood sexual abuse as well as psychological distress,  
25 coping strategies, the partner's illicit drug use and binge drinking and sexual relationship  
26 power. Regardless of the confounders controlled for, all but one study found a positive  
27 direction of association and reported varying magnitudes of association.

### 28 29 30 31 32 33 34 35 36 37 38 39 40 41 42 ***IPV and hard drug use (crack, cocaine, heroin)***

43 Four studies examined the relationship between recent IPV and hard drug use,<sup>14 21 28 41</sup> of  
44 which one reported an association in both directions.<sup>21</sup> Two studies provided two estimates of  
45 IPV and subsequent hard drug use, both of which showed a positive direction of association  
46 although only one was statistically significant.<sup>21 41</sup> The pooled OR from these studies was  
47 2.05 (95% CI 1.19-3.52,  $I^2 = 0.0\%$ ,  $p=0.948$ ). Three studies provided four estimates of hard  
48 drug use and subsequent IPV, which showed a positive direction of association and three of  
49  
50  
51  
52  
53  
54  
55  
56  
57  
58  
59  
60

1  
2  
3 these were statistically significant.<sup>14 21 28</sup> Three of these estimates were included in the meta-  
4 analysis, resulting in a pooled OR of 2.20 (95% CI 1.52-3.17,  $I^2 = 0.0\%$ ,  $p=0.455$ ).  
5  
6  
7

8  
9 **Hard drug use measurement:** Of the two studies that measured IPV and subsequent hard  
10 drug use, one study measured drug use in the last 12 months<sup>41</sup> and the other in the last 6  
11 months.<sup>21</sup> Of the three studies that measured hard drug use and subsequent IPV, one assessed  
12 use in the last 12 months<sup>28</sup> and two in the last six months.<sup>14 21</sup> Of the four studies, two used  
13 the Drug Use and Risk Behaviour Questionnaire<sup>14 21</sup> and two asked about use of specific hard  
14 drugs including crack, cocaine and heroin.<sup>28 41</sup> Of the latter, one of the studies used two  
15 methods for assessing hard drug use at each wave including self-report information only and  
16 combined self-report and toxicological information.<sup>41</sup>  
17  
18  
19  
20  
21  
22  
23  
24  
25  
26  
27

28  
29 **Common risk factors/confounding:** Of the two studies that measured IPV and subsequent  
30 hard drug use, one controlled for time one levels of hard drug use<sup>41</sup>. Of the three studies that  
31 measured hard drug use and subsequent IPV, two controlled for time one levels of IPV.<sup>14 28</sup>  
32 All four studies controlled for socio-demographic factors. El-Bassel<sup>21</sup> controlled for  
33 childhood sexual abuse, post-traumatic stress disorder, multiple concurrent partners and  
34 frequency of condom use. Gilbert<sup>14</sup> controlled for childhood sexual abuse, psychological  
35 distress, coping strategies, the partner's illicit drug use and binge drinking and sexual  
36 relationship power.  
37  
38  
39  
40  
41  
42  
43  
44  
45  
46  
47

### 48 ***IPV and marijuana use***

49  
50 Four studies examined the relationship between recent IPV and marijuana use,<sup>14 16 21 28</sup> of  
51 which two studies reported an association in both directions.<sup>14 21</sup> Three studies provided three  
52 estimates of IPV and subsequent marijuana use, all showing a positive direction of  
53  
54  
55  
56  
57

1  
2  
3 association, although none were statistically significant.<sup>14 16 21</sup> Two of these studies were  
4 included in the meta-analysis resulting in a pooled OR of 1.52 (95% CI 1.04-2.24,  $I^2 = 5.4\%$ ,  
5  $p=0.304$ ). Three studies provided four estimates of marijuana use and subsequent IPV<sup>14 21 28</sup>  
6 of which one showed a positive and statistically significant relationship. Three of these  
7 estimates were included in the meta-analysis, resulting in a pooled OR of 1.96 (95% CI 0.8-  
8 4.83). This was heterogeneous ( $I^2 = 85.4\%$ ,  $p=0.001$ ).

9  
10  
11  
12  
13  
14  
15  
16  
17  
18 **Marijuana use measurement:** Of the four studies, two measured marijuana use in the last  
19 12 months<sup>16 28</sup> and two in the last six months.<sup>14 21</sup> All studies used self-report information to  
20 assess for marijuana use.  
21  
22  
23

24  
25  
26 **Common risk factors/confounding:** Of the three studies that measured IPV and subsequent  
27 marijuana use, two controlled for time levels of marijuana use.<sup>14 16</sup> Of the three studies that  
28 measured marijuana use and subsequent IPV, two controlled for time levels of IPV.<sup>14 28</sup> All  
29 the studies controlled for socio-demographic factors. El-Bassel<sup>21</sup> controlled for childhood  
30 sexual abuse, post-traumatic stress disorder, multiple concurrent partners and frequency of  
31 condom use. Gilbert<sup>14</sup> controlled for childhood sexual abuse, psychological distress, coping  
32 strategies, the partner's illicit drug use and binge drinking and sexual relationship power.  
33  
34  
35  
36  
37  
38  
39  
40  
41  
42  
43

#### 44 ***IPV and STIs (excluding HIV)***

45  
46 Three studies provided three estimates of the association between recent IPV and subsequent  
47 STIs<sup>20 39 45</sup> of which one showed a positive and statistically significant relationship.<sup>39</sup> The  
48 meta-analysis of two of these studies<sup>20 39</sup> resulted in a pooled OR of 1.10 (95% CI 0.56-2.18,  
49  $I^2 = 35.5\%$ ,  $p=0.214$ ).  
50  
51  
52  
53  
54  
55  
56  
57  
58  
59  
60

1  
2  
3 **STI measurement:** One study assessed for STIs (chlamydia, gonorrhoea or trichomoniasis)  
4 within the last three months using biological measures,<sup>39</sup> another relied on self-report to  
5 assess for STIs at the last wave<sup>20</sup> and the third study assessed women quarterly for  
6 gonorrhoeae, chlamydia or trichomoniasis.<sup>45</sup>  
7  
8  
9  
10

11  
12  
13 **Common risk factors/confounding:** All the studies controlled for socio-demographic  
14 factors. El-Bassel's study<sup>21</sup> of women attending a methadone maintenance clinic adjusted for  
15 time one HIV risk factors (i.e. frequency of condom use, frequency of requesting condom  
16 use, having unprotected anal sex, exchanging sex for drugs, being HIV positive and having  
17 had an STI), as well as drug and alcohol use. Chowdhary & Patel<sup>39</sup> removed women with an  
18 STI at time one from the analysis. However, this would likely have introduced bias in the  
19 resulting cases, as it would have excluded women with IPV that preceded the acquisition of  
20 an STI at baseline. Wilson's<sup>45</sup> study of HIV positive sex workers did not control for time one  
21 sexual risk behaviours, although it did control for a lifetime history of sexual violence since  
22 the age of 15 by someone other than the index partner. Figure 3 presents the forest plots for  
23 alcohol use, hard drug use, marijuana use and STIs.  
24  
25  
26  
27  
28  
29  
30  
31  
32  
33  
34  
35  
36  
37  
38

## 39 **Discussion**

### 40 ***Summary of main findings***

41  
42 Our review identified cohort studies that examined the relationship between recent IPV (i.e.  
43 IPV occurring up to and including the last 12 months) and depression, postpartum depression,  
44 alcohol use, hard drug use, marijuana use and STIs. Although a few other health or health  
45 related outcomes were identified (i.e. sexual risk behaviours, HIV infection, general anxiety,  
46 perceived stress and gynaecological problems) these could not be included in a meta-analysis  
47 because there was only one estimate. We found evidence consistent with a bi-directional  
48 relationship between recent IPV and depressive symptoms. Recent IPV was also associated  
49  
50  
51  
52  
53  
54  
55  
56  
57  
58  
59  
60



1  
2  
3 with increased symptoms of postpartum depression. There was some evidence of a bi-  
4  
5 directional relationship between recent IPV and hard drug use, and IPV and subsequent  
6  
7 marijuana use although there were a limited number of studies. There was no evidence of an  
8  
9 association between recent IPV and alcohol or STIs although the evidence was weak with  
10  
11 few studies and inconsistent measurement of alcohol and STIs.  
12  
13

14  
15 Although the search strategy did not limit the types of health outcomes identified, the review  
16  
17 found no cohort studies for recent IPV exposure and non-communicable diseases such as  
18  
19 cardiovascular disease, hypertension and obesity. Nor did we find longitudinal evidence for  
20  
21 recent experience of IPV and posttraumatic stress disorder or anxiety disorder. There is  
22  
23 limited evidence from cross-sectional data that lifetime IPV increases the risk of  
24  
25 cardiovascular disease.<sup>51</sup> Cohort studies measuring past history of IPV have reported an  
26  
27 association with increased body mass index,<sup>52</sup> increased risk for cardiovascular disease<sup>53</sup> and  
28  
29 hypertension.<sup>54</sup> Physiological mechanisms may explain the association between IPV and  
30  
31 some adverse health outcomes through complex neural, neuroendocrine and immune  
32  
33 responses to acute and chronic stress. For example, sustained and acute elevated stress levels  
34  
35 have been linked to cardiovascular disease, hypertension, gastrointestinal disorders and  
36  
37 chronic pain. When exposed to prolonged or acute stress, areas of the brain (e.g.  
38  
39 hippocampus, amyglada and prefrontal cortex) undergo structural changes that can impact on  
40  
41 mental and cognitive functioning, which can lead to mental disorders.<sup>55</sup>  
42  
43  
44  
45  
46  
47

48 We found evidence consistent with a bi-directional relationship between recent experience of  
49  
50 IPV and depressive symptoms. The magnitude of the association in either direction is similar  
51  
52 to that reported in our previous review of 'ever' IPV and depressive symptoms<sup>4</sup> although  
53  
54 there were fewer estimates in our meta-analysis of recent IPV and depressive symptoms.  
55  
56  
57

1  
2  
3 All the studies on postpartum depressive symptoms conceptualised IPV as the dependent  
4 variable and there was evidence that recent experience of IPV or IPV during pregnancy  
5 increased symptoms of subsequent postpartum depression although there was substantial  
6 heterogeneity. The magnitude of the association was slightly lower (OR=2.19, 95% CI 1.39-  
7 3.45) compared to Howard et al.<sup>56</sup> who reported a three-fold increase in the levels of  
8 depressive symptoms in the postnatal period after having experienced IPV during pregnancy  
9 (OR=3.1, 95% CI 2.7-3.6). However, the authors state that study heterogeneity and lack of  
10 data on baseline symptoms prevented conclusions on temporality. In addition, we excluded  
11 one study that was included in the Howard et al review as it measures postnatal depressive  
12 symptoms using the Edinburgh Postnatal Depression Scale (EPDS) at the final wave, but  
13 assesses common mental health disorders during pregnancy with the Self-Reporting  
14 Questionnaire (SRQ-20).<sup>57</sup> A recently published systematic review explored studies of IPV  
15 during pregnancy and perinatal mental disorders in low and middle income countries.  
16 However, most of the studies were cross-sectional and consider partner violence experienced  
17 during pregnancy. Furthermore, estimates were not pooled in a meta-analysis.<sup>58</sup>

18  
19  
20  
21  
22  
23  
24  
25  
26  
27  
28  
29  
30  
31  
32  
33  
34  
35  
36  
37 There was no evidence of an association between recent IPV and alcohol use in either  
38 direction. This might be because there were fewer estimates in the meta-analysis of recent  
39 IPV and measurement of problematic alcohol use was conceptualised in a number of different  
40 ways for example, binge drinking, heavy episodic drinking and high risk alcohol use, which  
41 may have diluted the effect. None of the estimates in the meta-analysis measured alcohol use  
42 disorder. Furthermore, few estimates in the meta-analysis controlled for time one levels of  
43 IPV or alcohol use, and none included the perpetrator's alcohol use which may be related to  
44 IPV and/or the woman's drinking behaviour. This finding is in contrast to our previous  
45 review of 'ever' IPV and alcohol use which did find evidence consistent with a bi-directional  
46  
47  
48  
49  
50  
51  
52  
53  
54  
55  
56  
57  
58  
59  
60

1  
2  
3 relationship.<sup>5</sup> Although the pooled estimates in both reviews are based studies that assess  
4 binge drinking, the Devries review includes estimates of IPV that occurred in the distant past  
5 (i.e. before the last 12 months).  
6  
7  
8  
9

10  
11 Our review found evidence consistent with a bi-directional relationship between recent IPV  
12 and hard drug use. However, this finding should be treated with caution as there were very  
13 few studies overall, and one of the studies was based on a sample of women attending a  
14 methadone maintenance clinic. For marijuana use, there were few studies, but the evidence  
15 suggests that IPV predicts subsequent marijuana use. Pooled estimates did not support that  
16 marijuana use predicts subsequent IPV, although estimates were heterogeneous. The evidence  
17 for recent IPV and STI infection was in conflicting directions and there were only two  
18 estimates. Our review adds to previous systematic reviews as it focuses on longitudinal  
19 studies that measure recent experiences of IPV. Furthermore it includes a broader range of  
20 health or health related outcomes and explores bi-directionality. The review also highlights  
21 that longitudinal studies on recent IPV are lacking for important health outcomes that are  
22 known to be associated with partner violence.  
23  
24  
25  
26  
27  
28  
29  
30  
31  
32  
33  
34  
35  
36  
37  
38  
39

#### 40 **Limitations of the review**

41 To our knowledge, this is the first systematic review of cohort studies to measure the  
42 magnitude of the association between recent exposure to IPV and health outcomes. Although  
43 we conducted an extensive search of the global literature, the review has a number of  
44 limitations. Due to the large number of abstracts retrieved and the limited timeframe for the  
45 review, we were not able to employ double screening of abstracts. Citation tracking was not  
46 undertaken although we conducted reference list screening of key systematic review papers.  
47  
48  
49  
50  
51  
52  
53  
54  
55 However, two researchers reviewed the final set of included papers. One researcher was  
56  
57  
58  
59  
60

1  
2  
3 responsible for extracting data from included papers. As some studies measured the outcome  
4  
5 variable (either IPV or the health condition) continuously, it was not possible to combine all  
6  
7 measures of effect, which limited the number of studies in the meta-analyses. However, we  
8  
9 comment on the direction of the association of studies that were not included in the meta-  
10  
11 analysis in the results section for each health condition. It was not possible to quantitatively  
12  
13 assess publication bias as too few studies were in the meta-analyses of each health condition.  
14  
15

### 16 17 18 **Sources of bias and limitations of included studies**

19  
20 One of the main limitations of the included studies relates to the lack of consistency in  
21  
22 controlling for key potential confounders. With regard to studies on depression, hard drug use  
23  
24 and marijuana use, most controlled for time one levels of the health condition or IPV (where  
25  
26 IPV was the dependent variable). Far fewer of the estimates on IPV and later alcohol use and  
27  
28 IPV and STI controlled for time one levels of the health outcome.  
29  
30

31  
32  
33 With regard to the studies on depressive symptoms, only two controlled for early childhood  
34  
35 trauma (i.e. childhood sexual and/or physical abuse) and two controlled for alcohol use, even  
36  
37 though both are known to increase the risk for depression.<sup>59 60</sup> This makes it difficult to rule  
38  
39 them out as potential contributors to the causation of the outcomes. Nevertheless, we found  
40  
41 that studies showed a positive direction of association, regardless of which variables were  
42  
43 adjusted for, and there was no clear pattern of differing magnitude of association that  
44  
45 indicated the relationship between IPV and depressive symptoms were not likely to be  
46  
47 entirely accounted for by shared risk factors.  
48  
49

50  
51  
52 Little is known about the potential causal mechanisms between depression and subsequent  
53  
54 IPV. However, women who are depressed may experience symptoms (e.g. lethargy and  
55  
56

1  
2  
3 withdrawal) that impact their capacity for engaging in self-care behaviours including help-  
4 seeking and contact with health care providers that could enable them to extricate themselves  
5 from the relationship. It is also plausible that earlier, perhaps unmeasured experiences of  
6 violence, such as childhood sexual abuse and trauma are causing depression and later IPV, or  
7 that depression is mediating the relationship between childhood sexual abuse and later IPV. A  
8 path analysis with cross-sectional data supports this hypothesis<sup>60</sup>, but few longitudinal  
9 studies have explored these relationships.  
10  
11  
12  
13  
14  
15  
16  
17  
18  
19

20 Only two studies on alcohol use controlled for childhood sexual abuse and one controlled for  
21 the partner's level of alcohol use, both of which are potential causes of women's alcohol use.  
22 It has been suggested that women who drink heavily are more likely to have a partner who  
23 drinks heavily, which can increase their risk of IPV because heavy alcohol use by men is  
24 associated with IPV perpetration.<sup>61</sup> This can occur because people tend to choose a partner  
25 with similar drinking patterns to themselves or through the influence of their partner's  
26 drinking patterns and expectations.<sup>62</sup> Research also suggests that the partner's or the woman's  
27 drinking may fuel conflict in the relationship. A nationally representative study from the US  
28 found that couples with similar drinking patterns (e.g. both abstinent or both binge drinkers)  
29 were less likely to experience IPV in their relationship compared to those with discordant  
30 drinking habits.<sup>63</sup> This implies that relationship conflict may result in IPV, as opposed to  
31 alcohol use alone because high alcohol use would be more predictive than discordant use.  
32 Alcohol use was measured in a variety of ways with most assessing binge drinking or heavy  
33 drinking and only two studies measuring alcohol dependence. Although heavy alcohol  
34 consumption increases the risk for disease, injury and premature death<sup>64 65</sup> the adverse  
35 consequences may vary considerably between people who sporadically drink heavily and  
36 those who develop an alcohol use disorder. Although the evidence points to a bi-directional  
37  
38  
39  
40  
41  
42  
43  
44  
45  
46  
47  
48  
49  
50  
51  
52  
53  
54  
55  
56  
57  
58  
59  
60

1  
2  
3 relationship between IPV and hard drug use and IPV and marijuana use there were few  
4 estimates. Women may self-medicate with alcohol, tobacco or drugs in an attempt to cope  
5 with the trauma and stress of living in an abusive relationship, which in themselves are  
6 important risk factors for poor health. However, alcohol or substance abuse by the abuser or  
7 the woman has also been identified as a trigger to violent episodes or a factor that contributes  
8 to more severe violence.<sup>66</sup> The evidence for the association between recent IPV and STIs is  
9 uncertain.  
10  
11  
12  
13  
14  
15  
16  
17  
18  
19

20 It was not possible to examine whether the duration or severity of the violence influenced the  
21 relationship between IPV and health. Studies conceptualised violence as physical, sexual,  
22 verbal, or emotional (or psychological), with most using a combination of types of violence.  
23 Only one study provided estimates of minor and severe violence. Studies reported the time  
24 frame in which the violence occurred, but not the duration.  
25  
26  
27  
28  
29  
30  
31  
32

33 The majority of the studies were from high income countries, most notably the USA and only  
34 seven studies were from middle income countries where it is known that the prevalence of  
35 past year IPV is higher. Six of the studies were of adolescents, again mostly in high income  
36 countries, where these were likely to be dating relationships with no cohabitation. One study  
37 included young girls and women. Experiences of IPV in adult and adolescent relationships  
38 may be qualitatively different, in that there is a lower likelihood of experiencing systematic  
39 and chronic violence in dating relationships.<sup>67</sup> About a third of the studies were drawn from  
40 clinical settings, schools or were taken from sub-populations and therefore subject to bias  
41 (e.g. HIV positive sex workers, women with depressive symptoms and women on methadone  
42 maintenance). More population-based cohort studies are needed in order to generalise the  
43 findings. Most studies measured physical violence and some modelled exposure to physical  
44  
45  
46  
47  
48  
49  
50  
51  
52  
53  
54  
55  
56  
57  
58  
59  
60

1  
2  
3 and sexual and other forms of violence separately. However, other forms of violence (e.g.  
4 emotional abuse, threats) may also associated with some of the health outcomes. Most studies  
5 constructed the reference categories for IPV as binary opposites, meaning that some  
6 participants in the reference group may have been exposed to other forms of IPV that were  
7 not measured or modelled. This can bias the effect estimates towards the null and  
8 underestimate the magnitude of the association between recent IPV and health outcomes.  
9 Some studies included only women who were in a relationship for all waves of data  
10 collection. However, research shows that the prevalence of IPV is higher among women who  
11 are no longer with abuser compared to those currently in a relationship<sup>68</sup> and excluding these  
12 women may dilute the association between IPV and health outcomes.  
13  
14  
15  
16  
17  
18  
19  
20  
21  
22  
23  
24  
25

## 26 **Implications**

27  
28 The evidence on the association between exposure to IPV and mental and physical health  
29 outcomes has important implications for the delivery of interventions and services. IPV  
30 against women has received increasing attention by public health experts globally.<sup>2</sup> The  
31 results of this review indicates that health care providers and specialist IPV organisations  
32 should be aware of the bidirectional relationship between recent IPV and depression. Women  
33 with depression may be at risk of IPV, including IPV that is ongoing and services,  
34 particularly health care, should be trained to enquire about IPV experiences and respond and  
35 refer appropriately. Little is known about what pattern of exposure to IPV is more strongly  
36 associated with different health outcomes. In order to establish these connections,  
37 longitudinal studies of IPV and health are needed that distinguish recent violence with no  
38 prior history, from recent violence that is part of ongoing abuse, and historical violence that  
39 no longer occurs. Other factors that are known to mediate the relationship such as the  
40 duration and severity of IPV, childhood physical and sexual abuse, poverty related stress and  
41  
42  
43  
44  
45  
46  
47  
48  
49  
50  
51  
52  
53  
54  
55  
56  
57  
58  
59  
60

1  
2  
3 risk behaviours such as alcohol and substance abuse should be carefully considered in  
4  
5 analyses.  
6  
7  
8

9 **Figure 1: Flow of studies through review**

10  
11 **Figure 2: Forest plot estimates of the association between IPV and depression**

12  
13 **Figure 3: Forest plot estimates of the association between IPV and alcohol use, hard**  
14  
15 **drug use, marijuana use and STIs**  
16  
17  
18  
19  
20  
21  
22  
23  
24  
25  
26  
27  
28  
29  
30  
31  
32  
33  
34  
35  
36  
37  
38  
39  
40  
41  
42  
43  
44  
45  
46  
47  
48  
49  
50  
51  
52  
53  
54  
55  
56  
57  
58  
59  
60



**Declarations****Ethics approval**

Not applicable

**Consent for publication**

Not applicable

**Availability of data and material**

All data generated or analysed during this study are included in this published article [and its supplementary files].

**Competing interests**

The authors declare that they have no competing interests.

**Funding**

The study received funding from Wellspring. Wellspring did not contribute to study design, data collection and analysis, interpretation of data or writing the manuscript.

**Authors' contributions**

Conceived and designed the study: LJB KD. Data collection: LJB. Analysed the data: LJB, MR, KD. Wrote the first draft of the manuscript: LJB. Contributed to the writing of the manuscript: LJB CW KD MR. Agreed with manuscript results and conclusions: LJB CW KD MR.

**Acknowledgements**

None

## References

1. Devries KM, Mak JY, Garcia-Moreno C, et al. Global health. The global prevalence of intimate partner violence against women. *Science* 2013;340:1527-8. doi: 10.1126/science.1240937
2. World Health Organization. Global and regional estimates of violence against women: prevalence and health effects of intimate partner violence and non-partner sexual violence. Geneva, Switzerland: World Health Organization, 2013.
3. Mokdad AH, Hosseini Forouzanfar M, Daoud F, et al. Global burden of diseases, injuries, and risk factors for young people's health during 1990–2013: a systematic analysis for the Global Burden of Disease Study 2013. *Lancet* 2016;387:2383-401.
4. Devries KM, Mak JY, Bacchus LJ, et al. Intimate partner violence and incident depressive symptoms and suicide attempts: a systematic review of longitudinal studies. *PLoS Med* 2013;10:e1001439. doi: 10.1371/journal.pmed.1001439
5. Devries KM, Child JC, Bacchus LJ, et al. Intimate partner violence victimization and alcohol consumption in women: a systematic review and meta-analysis. *Addiction* 2014;109:379-91. doi: 10.1111/add.12393
6. Hindin MJ, Kishor S, Ansam DL. Intimate Partner Violence among Couples in 10 DHS Countries: Predictors and Health Outcomes . DHS Analytical studies No.18. Calverton, Maryland, USA, 2008.
7. World Health Organization. WHO multi-country study on women's health and domestic violence against women. Geneva, Switzerland, 2005.
8. Abramsky T, Devries K, Kiss L, et al. Findings from the SASA! Study: a cluster randomized controlled trial to assess the impact of a community mobilization intervention to prevent violence against women and reduce HIV risk in Kampala, Uganda. *BMC Med* 2014;12:122. doi: 10.1186/s12916-014-0122-5
9. Kim JC, Watts CH, Hargreaves JR, et al. Understanding the impact of a microfinance-based intervention on women's empowerment and the reduction of intimate partner violence in South Africa. *Am J Public Health* 2007 97:1794-802. doi: 10.2105/AJPH.2006.095521
10. Wagman JA, Gray RH, Campbell JC, et al. Effectiveness of an integrated intimate partner violence and HIV prevention intervention in Rakai, Uganda: analysis of an intervention in an existing cluster randomised cohort. *Lancet Glob Health* 2015;3:e23-33. doi: [http://dx.doi.org/10.1016/S2214-109X\(14\)70344-4](http://dx.doi.org/10.1016/S2214-109X(14)70344-4)
11. Glymour MM, Weuve J, Berkman LF, et al. When is baseline adjustment useful in analyses of change? An example with education and cognitive change. *Am J Epidemiol* 2005;162:267–78.
12. Higgins J, Thompson SG. Quantifying heterogeneity in a meta-analysis. *Statistics in Medicine* 2002;21(11):1539–58. doi: Higgins J, Thompson SG (2002) Quantifying heterogeneity in a meta-analysis. *Stat Med* 21: 1539–1558.
13. Chuang CH, Cattoi AL, McCall-Hosenfeld JS, et al. Longitudinal association of intimate partner violence and depressive symptoms. *Mental Health Fam Med* 2012;9:107-14.
14. Gilbert L, El-Bassel N, Chang M, et al. Substance use and partner violence among urban women seeking emergency care. *Psychol Addict Behav* 2012;26:226-35. doi: <http://dx.doi.org/10.1037/a0025869>
15. Keiley MK, Keller PS, El-Sheikh M. Effects of physical and verbal aggression, depression, and anxiety on drinking behavior of married partners: A prospective and retrospective longitudinal examination. *Aggress Behav* 2009;35:296-312. doi: <http://dx.doi.org/10.1002/ab.20310>

16. Nowotny KM, Graves JL. Substance use and intimate partner violence victimization among white, African American, and Latina women. *J Interpers Violence* 2013;28:3301-18. doi: <http://dx.doi.org/10.1177/0886260513496903>
17. Leher JA, Buka G, Gortmaker S, et al. Depressive symptomatology as predictor of exposure to intimate partner violence among US female adolescents and young adults. *Arch Pediatr Adolesc Med* 2006;160:270-76.
18. Teitelman AM, Ratcliffe SJ, Dichter ME, et al. Recent and past intimate partner abuse and HIV risk among young women. *Journal Obstet Gynecol Neonatal Nurs.* 2008;37:219-27. doi: <http://dx.doi.org/10.1111/j.1552-6909.2008.00231.x>
19. Zlotnick C, Johnson DM, Kohn R. Intimate Partner Violence and Long-Term Psychosocial Functioning in a National Sample of American Women. *J Interpers Violence* 2006;21:262-75. doi: <http://dx.doi.org/10.1177/0886260505282564>
20. El-Bassel N, Gilbert L, Wu E, et al. HIV and intimate partner violence among methadone-maintained women in New York City. *Soc Sci Med* 2005;61:171-83. doi: <http://dx.doi.org/10.1016/j.socscimed.2004.11.035>
21. El-Bassel N, Gilbert L, Wu E, et al. Relationship between drug abuse and intimate partner violence: a longitudinal study among women receiving methadone. *Am J Pub Health* 2005;95:1493-94. doi: <http://dx.doi.org/10.2105/AJPH.2005.069195>
22. Roberts TA, Klein J. Intimate partner abuse and high-risk behavior in adolescents. *Arch Pediatr Adolesc Med* 2003;157:375-80.
23. Newcomb MD, Vargas Carmona J. Adult Trauma and HIV Status Among Latinas: Effects Upon Psychological Adjustment and Substance Use. *AIDS Beh* 2004;8:417-28.
24. Foshee VA, Benefield TS, Ennett ST, et al. Longitudinal predictors of serious physical and sexual dating violence victimization during adolescence. *Prev Med* 2004;39:1007-16. doi: 10.1016/j.ypmed.2004.04.014
25. Suglia SF, Duarte CS, Sandel MT. Housing quality, housing instability, and maternal mental health. *J Urban Health.* 2011;88:1105-16.
26. Levendosky AA, Bogat GA, Huth-Bocks AC, et al. The influence of domestic violence on the stability of attachment from infancy to preschool. *J Clin Child Adolesc Psychol* 2011;40:398-410. doi: <http://dx.doi.org/10.1037/a0024561>
27. Testa M, Leonard KE. The impact of marital aggression on women's psychological and marital functioning in a newlywed sample. *J Fam Viol* 2001;16:115-30.
28. Testa M, Livingston JA, Leonard KE. Women's substance use and experiences of intimate partner violence: A longitudinal investigation among a community sample. *J Addict Behav* 2003;28:1649-64. doi: <http://dx.doi.org/10.1016/j.addbeh.2003.08.040>
29. Marsh Buzy W. Adolescent girls' alcohol use as a risk factor for relationship violence. *J Res Adolesc* 2004;14:449-70.
30. Valentine JM, Rodriguez MA, Lapeyrouse LM, et al. Recent intimate partner violence as a prenatal predictor of maternal depression in the first year postpartum among Latinas. *Arch Womens Ment Health* 2011;14:135-43. doi: <http://dx.doi.org/10.1007/s00737-010-0191-1>
31. Davidson SK, Dowrick CF, Gunn JM. Impact of functional and structural social relationships on two year depression outcomes: a multivariate analysis. *J Affect Disord* 2016;193:274-81.
32. Taft AJ, Watson LF. Depression and termination of pregnancy (induced abortion) in a national cohort of young Australian women: the confounding effect of women's experience of violence. *BMC Public Health* 2008;8:75. doi: <http://dx.doi.org/10.1186/1471-2458-8-75>

- 1  
2  
3 33. Woolhouse H, Gartland D, Mensah F, et al. Maternal depression from early pregnancy to  
4 4 years postpartum in a prospective pregnancy cohort study: implications for primary  
5 health care. *BJOG* 2014;122:312-21. doi: <http://dx.doi.org/10.1111/1471-0528.12837>
- 6 34. Boden JM, Fergusson DM, Horwood L. Alcohol misuse and relationship breakdown:  
7 Findings from a longitudinal birth cohort. *Drug Alcohol Depend* 2013;133:115-20.  
8 doi: <http://dx.doi.org/10.1016/j.drugalcdep.2013.05.023>
- 9 35. Gao W, Paterson J, Abbott M, et al. Impact of current and past intimate partner violence  
10 on maternal mental health and behaviour at 2 years after childbirth: Evidence from the  
11 Pacific Islands Families Study. *Aust N Z J Psychiatry* 2010;44:174-82. doi:  
12 <http://dx.doi.org/10.3109/00048670903487126>
- 13 36. Jewkes RK, Dunkle K, Nduna M, et al. Intimate partner violence, relationship power  
14 inequity, and incidence of HIV infection in young women in South Africa: A cohort  
15 study. *Lancet* 2010;376:41-48. doi: <http://dx.doi.org/10.1016/S0140-6736%2810%2960548-X>
- 17 37. Nduna M, Jewkes RK, Dunkle KL, et al. Associations between depressive symptoms,  
18 sexual behaviour and relationship characteristics: a prospective cohort study of young  
19 women and men in the Eastern Cape, South Africa. *J Int AIDS Soc* 2010;13:44. doi:  
20 <http://dx.doi.org/10.1186/1758-2652-13-44>
- 21 38. Tsai AC, Tomlinson M, Comulada WS, et al. Intimate partner violence and depression  
22 symptom severity among South African women during pregnancy and postpartum:  
23 population-based prospective cohort study. *PLoS Medicine* 2016;13:e1001943. doi:  
24 10.1371/journal.pmed1001943
- 25 39. Chowdhary N, Patel V. The effect of spousal violence on women's health: findings from  
26 the Stree Arogya Shodh in Goa, India. *J Postgrad Med* 2008;54:306-12.
- 27 40. Patel V, Rodrigues M, DeSouza N. Gender, poverty and postnatal depression: a study of  
28 mothers in Goa, India. *Am J Psychiatry* 2002;159:43-46.
- 29 41. Algeria M, Vera M, Shrout P, et al. Understanding hard-core drug use among urban  
30 Puerto Rican women in high-risk neighborhoods. *J Addict Behav* 2004;29:643-64.
- 31 42. Escriba-Aguir V, Royo-Marques M, Artazcoz L, et al. Longitudinal study of depression  
32 and health status in pregnant women: Incidence, course and predictive factors. *Eur*  
33 *Arch Psychiatry Clin Neurosci* 2013;263:143-51. doi:  
34 <http://dx.doi.org/10.1007/s00406-012-0336-5>
- 35 43. Kim J, Lee J. Prospective study on the reciprocal relationship between intimate partner  
36 violence and depression among women in Korea. *Soc Sci Med* 2013;99:42-48. doi:  
37 <http://dx.doi.org/10.1016/j.socscimed.2013.10.014>
- 38 44. Salazar M, Valladares E, Ohman A, et al. Ending intimate partner violence after  
39 pregnancy: findings from a community-based longitudinal study in Nicaragua. *BMC*  
40 *Public Health* 2009;9:350. doi: <http://dx.doi.org/10.1186/1471-2458-9-350>
- 41 45. Wilson KS, Deya R, Yuhus K, et al. A prospective cohort study of intimate partner  
42 violence and unprotected sex in HIV-positive female sex workers in Mombasa,  
43 Kenya. *J AIDS Behav* 2016;20:2054-64.
- 44 46. Kita S, Haruna M, Matsuzaki M, et al. Associations between intimate partner violence  
45 (IPV) during pregnancy, mother-to-infant bonding failure, and postnatal depressive  
46 symptoms. *Archives of Women's Mental Health* 2016;19:623-34.
- 47 47. Flach C, Leese M, Heron J, et al. Antenatal domestic violence, maternal mental health  
48 and subsequent child behaviour: a cohort study. *BJOG* 2011;118:1383-91. doi:  
49 <http://dx.doi.org/10.1111/j.1471-0528.2011.03040.x>
- 50 48. Rogathi JJ, Manongi R, Mushi D, et al. Postpartum depression among women who have  
51 experienced intimate partner violence: a prospective cohort study at Moshi, Tanzania.  
52 *J Affect Disord* 2017;218:238-45.
- 53  
54  
55  
56  
57  
58  
59  
60

- 1  
2  
3 49. Boden JM, Fergusson DM, Horwood L. Alcohol misuse and violent behavior: Findings  
4 from a 30-year longitudinal study. *Drug Alcohol Depend* 2012;122:135-41. doi:  
5 <http://dx.doi.org/10.1016/j.drugalcdep.2011.09.023>
- 6 50. Teitelman AM, Rratcliffe SJ, Dichter ME, et al. Recent and Past Intimate Partner Abuse  
7 and HIV Risk Among Young Women. *Obstet Gynecol Neonatal Nurs* 2008;37:219-  
8 27.
- 9 51. Stene LE, Jacobsen GW, Dyb G, et al. Intimate partner violence and cardiovascular risk  
10 in women: A population-based cohort study. *J Womens Health* 2013;22:250-58. doi:  
11 <http://dx.doi.org/10.1089/jwh.2012.3920>
- 12 52. Clark CJ, Spencer RA, Everson-Rose SA, et al. Dating violence, childhood maltreatment,  
13 and BMI from adolescence to young adulthood. *Pediatrics* 2014;134:678-85. doi:  
14 <http://dx.doi.org/10.1542/peds.2014-1179>
- 15 53. Clark CJ, Alonso A, Everson-Rose SA, et al. Intimate partner violence in late adolescence  
16 and young adulthood and subsequent cardiovascular risk in adulthood. *Prev Med*  
17 2016;87:132-37. doi: 10.1016/j.ypmed.2016.02.031
- 18 54. Clark CJ, Everson-Rose SA, Alonso A, et al. Effect of partner violence in adolescence  
19 and young adulthood on blood pressure and incident hypertension. *PLoS ONE*  
20 2014;9:e92204. doi: <http://dx.doi.org/10.1371/journal.pone.0092204>
- 21 55. Miller AH. Neuroendocrine and immune system interactions in stress and depression.  
22 *Psychiatr Clin North Am* 1998;21:443-63.
- 23 56. Howard LM, Oram S, Galley H, et al. Domestic violence and perinatal mental disorders:  
24 a systematic review and meta-analysis. *PLoS Med* 2013;10:e1001452. doi:  
25 <http://dx.doi.org/10.1371/journal.pmed.1001452>
- 26 57. Ludermir AB, Lewis G, Valongueiro SA, et al. Violence against women by their intimate  
27 partner during pregnancy and postnatal depression: a prospective cohort study. *Lancet*  
28 2010;376:903-10. doi: [http://dx.doi.org/10.1016/S0140-6736\(10\)60887-2](http://dx.doi.org/10.1016/S0140-6736(10)60887-2)
- 29 58. Halim N, Beard J, Mesic A, et al. Intimate partner violence during pregnancy and  
30 perinatal mental disorders in low and lower middle income countries: a systematic  
31 review of literature 1990-2017. *Clin Psychol Rev* 2017;
- 32 59. Boden JM, Fergusson DM. Alcohol and depression. *Addiction* 2011;106:906-14. doi:  
33 10.1111/j.1360-0443.2010.03351.x
- 34 60. Machisa MT, Christophides N, Jewkes R. Mental ill health in structural pathways to  
35 women's experiences of intimate partner violence. *PLOS One* 2017;12:0175240.
- 36 61. Foran HM, O'Leary KD. Alcohol and intimate partner violence: A meta-analytic review.  
37 *Clin Psychol Rev* 28 2008;28:1222-34.
- 38 62. Leonard KE, Eiden RD. Marital and family processes in the context of alcohol use and  
39 alcohol disorders. *Annu Rev Clin Psychol* 2007;3:285-310.
- 40 63. Leadley K, Clark C, R. C. Couples' drinking patterns, intimate partner violence, and  
41 alcohol-related partnership problems. *J Subst Abuse* 2000;11:253-63.
- 42 64. Barbosa C, Taylor B, Godfrey C, et al. Modelling lifetime QALYs and health care costs  
43 from different drinking patterns over time: a Markov model. *Int J Methods Psychiatr*  
44 *Res* 2010;19:97-109.
- 45 65. Room R, Babor T, Rehm J. Alcohol and public health. *Lancet HIV* 2005;365:519-30.
- 46 66. Campbell JC. Health consequences of intimate partner violence. *Lancet* 2002;359:1331-  
47 36.
- 48 67. Johnson MP. Patriarchal terrorism and common couple violence: two forms of violence  
49 against women. *J Marriage Fam* 1995;57:283-94.
- 50 68. Nyamayemombe C, Mishra V, Rusakaniko S, et al. The association between violence  
51 against women and hiv: evidence from a national population-based survey in  
52 Zimbabwe. Calverton (Maryland): ICF Macro., 2010.
- 53  
54  
55  
56  
57  
58  
59  
60

Figure 1: Flow of studies through the review

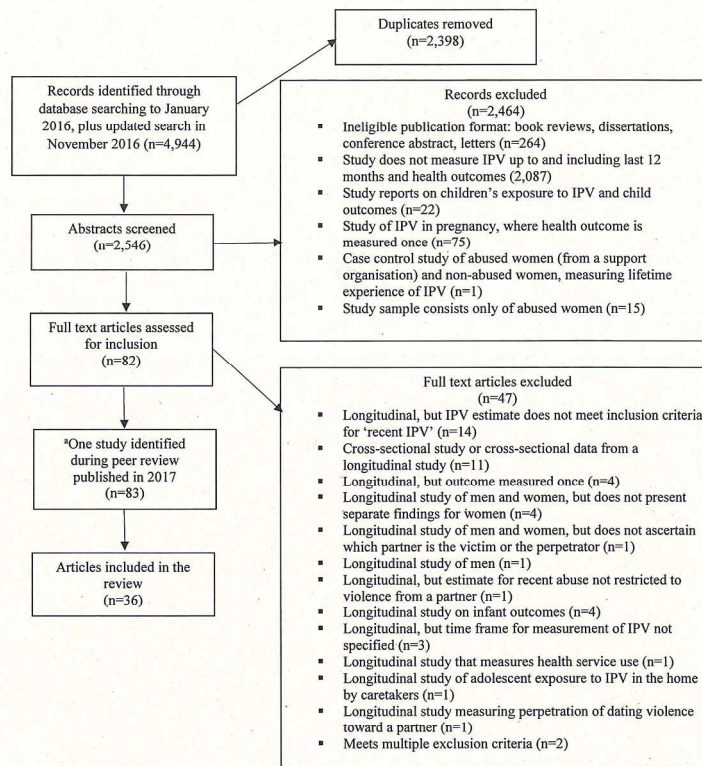

\*New systematic review published in 2017 on domestic violence in pregnancy and perinatal mental health disorders identified by editorial team during peer review of our paper

Figure 1 Flow of studies through the review

209x296mm (300 x 300 DPI)

Figure 2: Forest plot estimates of the association between IPV and depression

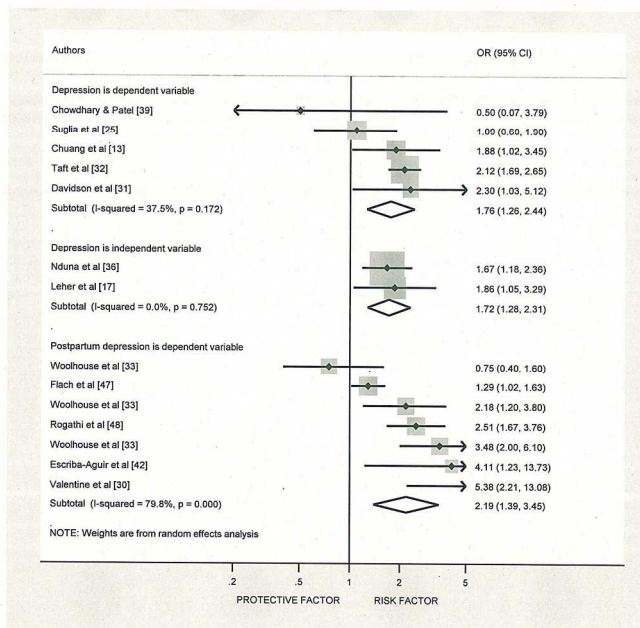

Notes: Woolhouse estimates are based on different sub-samples and are mutually exclusive. Meta-analysis with depression as the dependent variable was also undertaken excluding the Chowdhary study, but it did not materially change the overall pooled estimate (OR=1.83; 95% CI 1.35-2.49;  $I^2 = 35.1%$ ,  $p=0.202$ )

Figure 2 Forest plot estimates of the association between IPV and depression

209x296mm (300 x 300 DPI)

Figure 3: Forest plot estimates of the association between IPV and alcohol use, hard drug use, marijuana use and STIs

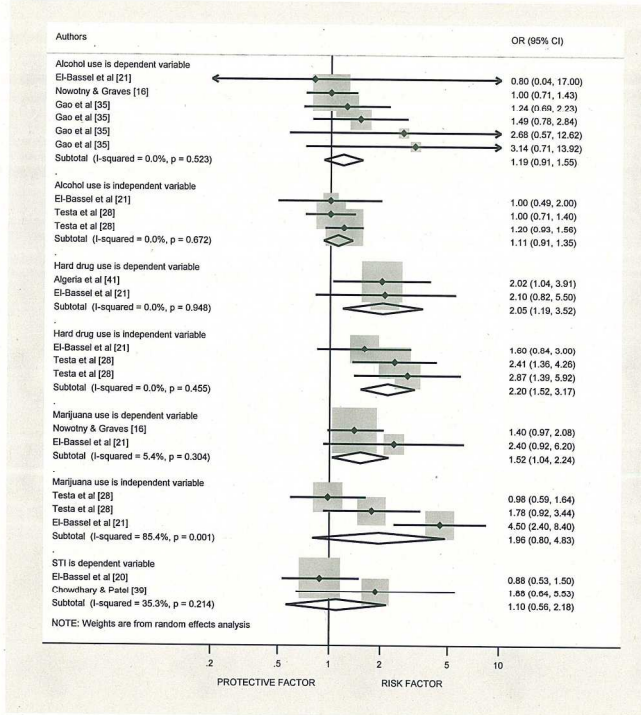

Note: Estimates from Gao and Testa are based on different sub-samples and are mutually exclusive

Figure 3 Forest plot estimates of the association between IPV and alcohol use, hard drug use, marijuana use and STIs

209x296mm (300 x 300 DPI)



## Appendix 1

### Search Strategy from Medline

1. domestic violence/ or spouse abuse/
2. Battered Women/
3. (spous\* abuse or battered wom\*n or intimate partner violence or intimate partner abuse or dating violence or domestic abuse).mp. [mp=title, abstract, original title, name of substance word, subject heading word, keyword heading word, protocol supplementary concept word, rare disease supplementary concept word, unique identifier]
4. (intimate adj4 partner adj4 violence).tw.
5. (intimate adj4 partner adj4 abuse).tw.
6. ((partner or relationship or wom\$n or domestic or spous\*) adj4 (abus\* or violen\* victimi\* or batter\*)).mp. [mp=title, abstract, original title, name of substance word, subject heading word, keyword heading word, protocol supplementary concept word, rare disease supplementary concept word, unique identifier]
7. Rape/
8. sexual violence.tw.
9. sexual abuse.tw.
10. rape.tw.
11. cohort studies/ or follow-up studies/ or longitudinal studies/ or "national longitudinal study of adolescent health"/ or prospective studies/
12. longitudinal stud\*.tw.
13. cohort stud\*.tw.
14. panel stud\*.tw.
15. follow up stud\*.tw.
16. prospective stud\*.tw.
17. longitudinal analysis.tw.
18. (longitudinal adj3 analysis).tw.
19. cohort analysis.tw.
20. (cohort adj3 analysis).tw.
21. panel analysis.tw.
22. (panel adj3 analysis).tw.
23. time series.tw.
24. (longitudinal adj3 stud\*).tw.
25. (cohort adj3 stud\*).tw.
26. (panel adj3 stud\*).tw.
27. (follow up adj3 stud\*).tw.
28. (prospective adj3 stud\*).tw.
29. letter.pt.

1  
2  
3 30. editorial.pt.  
4

5 31. comment.pt.  
6

7 32. 1 or 2 or 3 or 4 or 5 or 6 or 7 or 8 or 9 or 10  
8

9 33. 11 or 12 or 13 or 14 or 15 or 16 or 17 or 18 or 19 or 20 or 21 or 22 or 23 or 24 or 25 or 26  
10 or 27 or 28

11 34. 29 or 30 or 31  
12

13 35. 33 not 34  
14

15 **36. 32 and 35 (2,536)**  
16  
17  
18  
19  
20  
21  
22  
23  
24  
25  
26  
27  
28  
29  
30  
31  
32  
33  
34  
35  
36  
37  
38  
39  
40  
41  
42  
43  
44  
45  
46  
47  
48  
49  
50  
51  
52  
53  
54  
55  
56  
57  
58  
59  
60

For peer review only

## MOOSE Checklist for Meta-analyses of Observational Studies

| Item No                                     | Recommendation                                                                                                                                                                                                                                                               | Reported on Page No            |
|---------------------------------------------|------------------------------------------------------------------------------------------------------------------------------------------------------------------------------------------------------------------------------------------------------------------------------|--------------------------------|
| Reporting of background should include      |                                                                                                                                                                                                                                                                              |                                |
| 1                                           | Problem definition                                                                                                                                                                                                                                                           | 5                              |
| 2                                           | Hypothesis statement                                                                                                                                                                                                                                                         | NA                             |
| 3                                           | Description of study outcome(s)                                                                                                                                                                                                                                              | 6                              |
| 4                                           | Type of exposure or intervention used                                                                                                                                                                                                                                        | 5                              |
| 5                                           | Type of study designs used                                                                                                                                                                                                                                                   | 5                              |
| 6                                           | Study population                                                                                                                                                                                                                                                             | 5                              |
| Reporting of search strategy should include |                                                                                                                                                                                                                                                                              |                                |
| 7                                           | Qualifications of searchers (eg, librarians and investigators)                                                                                                                                                                                                               |                                |
| 8                                           | Search strategy, including time period included in the synthesis and key words                                                                                                                                                                                               | 6                              |
| 9                                           | Effort to include all available studies, including contact with authors                                                                                                                                                                                                      | 6                              |
| 10                                          | Databases and registries searched                                                                                                                                                                                                                                            | 6                              |
| 11                                          | Search software used, name and version, including special features used (eg, explosion)                                                                                                                                                                                      | 6                              |
| 12                                          | Use of hand searching (eg, reference lists of obtained articles)                                                                                                                                                                                                             | 6                              |
| 13                                          | List of citations located and those excluded, including justification                                                                                                                                                                                                        | 27 and see flow chart 1 figure |
| 14                                          | Method of addressing articles published in languages other than English                                                                                                                                                                                                      | NA see exclusion page 6        |
| 15                                          | Method of handling abstracts and unpublished studies                                                                                                                                                                                                                         | 7                              |
| 16                                          | Description of any contact with authors                                                                                                                                                                                                                                      | NA                             |
| Reporting of methods should include         |                                                                                                                                                                                                                                                                              |                                |
| 17                                          | Description of relevance or appropriateness of studies assembled for assessing the hypothesis to be tested                                                                                                                                                                   | NA                             |
| 18                                          | Rationale for the selection and coding of data (eg, sound clinical principles or convenience)                                                                                                                                                                                | 7-9                            |
| 19                                          | Documentation of how data were classified and coded (eg, multiple raters, blinding and interrater reliability)                                                                                                                                                               | 7-9                            |
| 20                                          | Assessment of confounding (eg, comparability of cases and controls in studies where appropriate)                                                                                                                                                                             | 7-9                            |
| 21                                          | Assessment of study quality, including blinding of quality assessors, stratification or regression on possible predictors of study results                                                                                                                                   | 7-9                            |
| 22                                          | Assessment of heterogeneity                                                                                                                                                                                                                                                  | 7-9                            |
| 23                                          | Description of statistical methods (eg, complete description of fixed or random effects models, justification of whether the chosen models account for predictors of study results, dose-response models, or cumulative meta-analysis) in sufficient detail to be replicated | 8                              |
| 24                                          | Provision of appropriate tables and graphics                                                                                                                                                                                                                                 | 10-26,28                       |
| Reporting of results should include         |                                                                                                                                                                                                                                                                              |                                |
| 25                                          | Graphic summarizing individual study estimates and overall estimate                                                                                                                                                                                                          | Figures 2 and 3                |
| 26                                          | Table giving descriptive information for each study included                                                                                                                                                                                                                 | 10-26                          |
| 27                                          | Results of sensitivity testing (eg, subgroup analysis)                                                                                                                                                                                                                       | NA see 40                      |

|    |                                                   |       |
|----|---------------------------------------------------|-------|
| 28 | Indication of statistical uncertainty of findings | 29-36 |
|----|---------------------------------------------------|-------|

| Item No                                 | Recommendation                                                                                                            | Reported on Page No |
|-----------------------------------------|---------------------------------------------------------------------------------------------------------------------------|---------------------|
| Reporting of discussion should include  |                                                                                                                           |                     |
| 29                                      | Quantitative assessment of bias (eg, publication bias)                                                                    | 39 - 40             |
| 30                                      | Justification for exclusion (eg, exclusion of non-English language citations)                                             | 39                  |
| 31                                      | Assessment of quality of included studies                                                                                 | 40 - 43             |
| Reporting of conclusions should include |                                                                                                                           |                     |
| 32                                      | Consideration of alternative explanations for observed results                                                            | 37 - 39             |
| 33                                      | Generalization of the conclusions (ie, appropriate for the data presented and within the domain of the literature review) | 37 - 39             |
| 34                                      | Guidelines for future research                                                                                            | 43-44               |
| 35                                      | Disclosure of funding source                                                                                              | 45                  |

From: Stroup DF, Berlin JA, Morton SC, et al, for the Meta-analysis Of Observational Studies in Epidemiology (MOOSE) Group. Meta-analysis of Observational Studies in Epidemiology. A Proposal for Reporting. *JAMA*. 2000;283(15):2008-2012. doi: 10.1001/jama.283.15.2008.

Transcribed from the original paper within the NEUROSURGERY® Editorial Office, Atlanta, GA, United States. August 2012.
