# Supplementary material for: Recent intimate partner violence against women and health: a systematic review and meta-analysis of cohort studies
Source: PubMed Central journal article supplement — BMJ Open. 2018 Jul 28;8(7):e019995. doi: 10.1136/bmjopen-2017-019995 (PMC6067339; doi:10.1136/bmjopen-2017-019995), 2018-07-28
Supplement: bmjopen-2017-019995supp001.pdf [file bmjopen-2017-019995supp001.pdf]

## Appendix 1

### Search Strategy from Medline

1. domestic violence/ or spouse abuse/
2. Battered Women/
3. (spous\* abuse or battered wom\*n or intimate partner violence or intimate partner abuse or dating violence or domestic abuse).mp. [mp=title, abstract, original title, name of substance word, subject heading word, keyword heading word, protocol supplementary concept word, rare disease supplementary concept word, unique identifier]
4. (intimate adj4 partner adj4 violence).tw.
5. (intimate adj4 partner adj4 abuse).tw.
6. ((partner or relationship or wom\$n or domestic or spous\*) adj4 (abus\* or violen\* victimi\* or batter\*)).mp. [mp=title, abstract, original title, name of substance word, subject heading word, keyword heading word, protocol supplementary concept word, rare disease supplementary concept word, unique identifier]
7. Rape/
8. sexual violence.tw.
9. sexual abuse.tw.
10. rape.tw.
11. cohort studies/ or follow-up studies/ or longitudinal studies/ or "national longitudinal study of adolescent health"/ or prospective studies/
12. longitudinal stud\*.tw.
13. cohort stud\*.tw.
14. panel stud\*.tw.
15. follow up stud\*.tw.
16. prospective stud\*.tw.
17. longitudinal analysis.tw.
18. (longitudinal adj3 analysis).tw.
19. cohort analysis.tw.
20. (cohort adj3 analysis).tw.
21. panel analysis.tw.
22. (panel adj3 analysis).tw.
23. time series.tw.
24. (longitudinal adj3 stud\*).tw.
25. (cohort adj3 stud\*).tw.
26. (panel adj3 stud\*).tw.
27. (follow up adj3 stud\*).tw.
28. (prospective adj3 stud\*).tw.
29. letter.pt.

30. editorial.pt.

31. comment.pt.

32. 1 or 2 or 3 or 4 or 5 or 6 or 7 or 8 or 9 or 10

33. 11 or 12 or 13 or 14 or 15 or 16 or 17 or 18 or 19 or 20 or 21 or 22 or 23 or 24 or 25 or 26  
or 27 or 28

34. 29 or 30 or 31

35. 33 not 34

**36. 32 and 35 (2,536)**
